# Supplementary material for: The mechanism of the replacement of aluminum atoms in 1-ethyl-3-alkylalumolanes by boron atoms with boron halides
Source: Royal Society of Chemistry journal article supplement (doi:10.1039/d2cp05721b), 2023-01-01
Supplement: d2cp05721b1.pdf [file d2cp05721b1.pdf]

## The mechanism of replacement of aluminum atom in 1-ethyl-3-alkylaluminumolanes by boron atom with boron halides

*T. V. Tyumkina, L. I. Tulyabaeva, S. M. Idrisova, D. N. Islamov,  
L. M. Khalilov, U. M. Dzhemilev*

*Institute of Petrochemistry and Catalysis, Ufa Federal Research Center, Russian Academy of  
Sciences, Russian Federation, 450075, Ufa, Prospect Oktyabrya, 141*

### *Supporting Information*

#### Content:

|                                                                                                                                                                                                                                                        |     |
|--------------------------------------------------------------------------------------------------------------------------------------------------------------------------------------------------------------------------------------------------------|-----|
| <b>Table S1.</b> Calculated (PBE/3 $\zeta$ ) thermodynamic parameters for all optimized compounds and intermediates at T = 298.15 K ([S] = cal/(mol*K); [H] = [G] = cal/mol).....                                                                      | S2  |
| <b>Table S2.</b> Calculated (PBE/3 $\zeta$ ) relative thermodynamic parameters for intermeffiate <b>6a'</b> and and its ten possible* conformers at T = 298.15 K ([ $\Delta$ S] = cal/(mol*K); [ $\Delta$ H] = [ $\Delta$ G] = kcal/mol).....          | S5  |
| <b>Table S3.</b> Thermodynamic and activation parameters of reaction <b>4</b> $\rightarrow$ <b>5</b> calculated by M06-2X/cc-pVDZ method at T = 298 K ( $\Delta$ H, $\Delta$ G [kcal/mol]) in gas phase, THF, toluene, and dichloromethane (CPCM)..... | S5  |
| <b>Cartesian coordinates (PBE/3<math>\zeta</math>)</b> .....                                                                                                                                                                                           | S6  |
| <b>The 3<math>\zeta</math> basis set</b> .....                                                                                                                                                                                                         | S78 |
| <b>Table S4.</b> Energy effects and activation barriers of reactions calculated by PBE/3 $\zeta$ , PBE/6-31G(d,p), PBE(GD3)/6-31G(d,p), PBE0/6-31G(d,p), PBE0(GD3)/6-31G(d,p) methods.....                                                             | S84 |
| <b>Figure S1.</b> Energy diagram of route 2 of the reaction between 1,3-diethylaluminumolane and BHal <sub>3</sub> .....                                                                                                                               | S87 |

**Table S1.** Calculated (PBE/3 $\zeta$ ) thermodynamic parameters for all optimized compounds and intermediates at T = 298.15 K ([S] = cal/(mol\*K); [H] = [G] = kcal/mol).

| Compound         | H <sup>0</sup> | G <sup>0</sup> | S <sup>0</sup> |
|------------------|----------------|----------------|----------------|
| <b>3</b>         | -349412.4      | -349445.6      | 111.2          |
| <b>4</b>         | -203540.8      | -203560.1      | 64.6           |
| <b>4'</b>        | -881674.7      | -881696.5      | 73.0           |
| <b>5a</b>        | -552953.5      | -552996.9      | 145.7          |
| <b>5a'</b>       | -1231086.9     | -1231134.9     | 160.9          |
| <b>5b</b>        | -552953.2      | -552997.3      | 147.7          |
| <b>5b'</b>       | -1231087.0     | -1231133.5     | 156.0          |
| <b>6a</b>        | -552973.2      | -553015.2      | 140.6          |
| <b>6a + THF</b>  | -1231118.6     | -1231162.1     | 145.8          |
| <b>6a + 2THF</b> | -1522454.1     | -1522517.4     | 212.3          |
| <b>6a'</b>       | -1231118.6     | -1231162.1     | 145.8          |
| <b>6a'_1</b>     | -1231116.0     | -1231161.3     | 152.0          |
| <b>6a'_2</b>     | -1231116.7     | -1231159.2     | 142.5          |
| <b>6a'_3</b>     | -1231116.9     | -1231161.3     | 148.8          |
| <b>6a'_4</b>     | -1231119.3     | -1231162.4     | 144.5          |
| <b>6a'_5</b>     | -1231119.6     | -1231162.8     | 145.0          |
| <b>6a'_6</b>     | -1231117.2     | -1231161.6     | 148.8          |
| <b>6a'_7</b>     | -1231117.8     | -1231162.5     | 150.0          |
| <b>6a'_8</b>     | -1231116.6     | -1231162.8     | 155.1          |
| <b>6a'_9</b>     | -1231118.2     | -1231163.5     | 151.9          |
| <b>6a'_10</b>    | -1231112.9     | -1231157.9     | 151.0          |
| <b>6b</b>        | -552973.3      | -553015.2      | 140.4          |
| <b>6b + THF</b>  | -1231117.5     | -1231160.8     | 145.1          |
| <b>6b + 2THF</b> | -1522450.7     | -1522512.9     | 208.6          |
| <b>6b'</b>       | -1231117.5     | -1231160.8     | 145.1          |
| <b>7a</b>        | -552988.7      | -553031.4      | 143.5          |
| <b>7a + THF</b>  | -1231141.8     | -1231186.6     | 150.2          |
| <b>7a + 2THF</b> | -1522479.1     | -1522549.1     | 234.7          |
| <b>7a'</b>       | -1231141.8     | -1231186.6     | 150.2          |
| <b>7b</b>        | -552988.7      | -553030.9      | 141.9          |
| <b>7b + THF</b>  | -1231141.0     | -1231185.6     | 149.5          |
| <b>7b + 2THF</b> | -1522456.5     | -1522531.1     | 250.3          |

|             |             |             |       |
|-------------|-------------|-------------|-------|
| <b>7b'</b>  | -1231141.0  | -1231185.6  | 149.5 |
| <b>8</b>    | -327001.6   | -327026.6   | 84.1  |
| <b>8'</b>   | -779109.5   | -779136.5   | 90.5  |
| <b>9</b>    | -225978.1   | -226005.4   | 91.5  |
| <b>9'</b>   | -452025.5   | -452053.6   | 94.1  |
| <b>10a</b>  | -756513.9   | -756569.0   | 184.6 |
| <b>10a'</b> | -2112792.4  | -2112851.9  | 199.5 |
| <b>10b</b>  | -756514.1   | -756568.0   | 181.0 |
| <b>10b'</b> | -2112792.1  | -2112851.6  | 199.8 |
| <b>11a</b>  | -756535.4   | -756585.7   | 168.9 |
| <b>11a'</b> | -2112818.2  | -2112874.8  | 189.7 |
| <b>11b</b>  | -756536.4   | -756587.0   | 169.7 |
| <b>11b'</b> | -2112820.2  | -2112877.6  | 192.5 |
| <b>12</b>   | -429525.9   | -429562.5   | 122.6 |
| <b>12'</b>  | -1333703.2  | -1333742.9  | 133.0 |
| <b>13a</b>  | -429520.4   | -429559.1   | 129.7 |
| <b>13a'</b> | -1333700.1  | -1333745.2  | 151.3 |
| <b>13b</b>  | -429520.4   | -429559.2   | 130.1 |
| <b>13b'</b> | -1333700.1  | -1333744.4  | 148.5 |
| <b>14</b>   | -4860932.9  | -4860957.2  | 81.3  |
| <b>15</b>   | -5210344.5  | -5210396.3  | 173.6 |
| <b>16</b>   | -5210345.3  | -5210390.2  | 150.9 |
| <b>17</b>   | -5210378.0  | -5210426.1  | 161.6 |
| <b>18</b>   | -5210404.4  | -5210451.4  | 157.7 |
| <b>19</b>   | -3431953.1  | -3431981.9  | 96.3  |
| <b>20</b>   | -1778445.2  | -1778474.1  | 96.9  |
| <b>21</b>   | -5210344.4  | -5210397.1  | 176.8 |
| <b>22</b>   | -5210377.3  | -5210425.3  | 161.2 |
| <b>23</b>   | -5210404.4  | -5210451.4  | 157.6 |
| <b>24</b>   | -10071310.9 | -10071378.0 | 224.9 |
| <b>25</b>   | -10071340.0 | -10071403.1 | 211.8 |
| <b>26</b>   | -6639380.1  | -6639423.3  | 144.6 |
| <b>27</b>   | -10071309.9 | -10071376.0 | 221.7 |
| <b>28</b>   | -10071297.0 | -10071357.0 | 201.5 |
| <b>29</b>   | -10071341.0 | -10071402.9 | 207.6 |
| <b>30a</b>  | -6639377.9  | -6639425.3  | 159.1 |

|                         |             |             |       |
|-------------------------|-------------|-------------|-------|
| <b>30b</b>              | -6639377.7  | -6639425.2  | 159.5 |
| <b>33</b>               | -698839.8   | -698891.7   | 174.2 |
| <b>34a</b>              | -1580540.6  | -1580604.5  | 214.3 |
| <b>34b</b>              | -1580545.5  | -1580612.2  | 223.8 |
| <b>TS(5a-6a)</b>        | -552953.8   | -552994.0   | 134.7 |
| <b>TS(5a'-6a')</b>      | -1231084.0  | -1231126.0  | 141.2 |
| <b>TS(5b-6b)</b>        | -552952.8   | -552993.3   | 135.9 |
| <b>TS(5b'-6b')</b>      | -1231083.8  | -1231126.3  | 142.5 |
| <b>TS(6a-7a)</b>        | -552976.6   | -553016.0   | 132.1 |
| <b>TS(6a-7a) + THF</b>  | -1231116.7  | -1231157.5  | 136.6 |
| <b>TS(6a-7a) + 2THF</b> | -1522434.9  | -1522500.0  | 218.2 |
| <b>TS(6a'-7a')</b>      | -1231116.7  | -1231157.5  | 136.6 |
| <b>TS(6b-7b)</b>        | -552969.4   | -553009.0   | 132.9 |
| <b>TS(6b-7b) + THF</b>  | -1231111.9  | -1231153.1  | 137.9 |
| <b>TS(6b-7b) + 2THF</b> | -1522435.7  | -1522500.1  | 215.9 |
| <b>TS(6b'-7b')</b>      | -1231111.9  | -1231153.1  | 137.9 |
| <b>TS(10a-11a)</b>      | -756509.9   | -756558.5   | 163.2 |
| <b>TS(10a'-11a')</b>    | -2112782.7  | -2112836.1  | 179.1 |
| <b>TS(10b-11b)</b>      | -756511.4   | -756559.5   | 161.2 |
| <b>TS(10b'-11b')</b>    | -2112777.9  | -2112832.3  | 182.3 |
| <b>TS(12-13a)</b>       | -429499.9   | -429532.5   | 109.4 |
| <b>TS(12'-13a')</b>     | -1333669.0  | -1333704.4  | 118.9 |
| <b>TS(12-13b)</b>       | -429501.2   | -429533.8   | 109.5 |
| <b>TS(12'-13b')</b>     | -1333668.2  | -1333703.5  | 118.3 |
| <b>TS(15-16)</b>        | -5210336.0  | -5210382.5  | 155.8 |
| <b>TS(16-17)</b>        | -5210344.0  | -5210387.2  | 145.1 |
| <b>TS(17-18)</b>        | -5210378.8  | -5210422.7  | 147.0 |
| <b>TS(21-22)</b>        | -5210330.8  | -5210376.4  | 152.8 |
| <b>TS(22-23)</b>        | -5210379.3  | -5210423.1  | 147.1 |
| <b>TS(24-25)</b>        | -10071296.6 | -10071356.9 | 202.3 |
| <b>TS(26-30a)</b>       | -6639353.0  | -6639392.8  | 133.6 |
| <b>TS(26-30b)</b>       | -6639353.0  | -6639392.8  | 133.5 |
| <b>TS(27-28)</b>        | -10071294.8 | -10071353.9 | 198.3 |
| <b>TS(28-29)</b>        | -10071298.4 | -10071358.6 | 201.8 |
| <b>TS(33-34a)</b>       | -1580497.5  | -1580557.1  | 199.9 |
| <b>TS(33-34b)</b>       | -1580492.8  | -1580555.0  | 208.6 |

**Table S2.** Calculated (PBE/3 $\zeta$ ) relative thermodynamic parameters for intermediate **6a'** and its ten possible\* conformers at T = 298.15 K ( $[\Delta S] = \text{cal}/(\text{mol}\cdot\text{K})$ ;  $[\Delta H] = [\Delta G] = \text{kcal/mol}$ ).

| Conformer       | $\Delta H^0$ | $\Delta G^0$ | $\Delta S^0$ |
|-----------------|--------------|--------------|--------------|
| <b>6a'</b>      | 0.9          | 1.4          | 3.3          |
| <b>6a'_1</b>    | 3.6          | 2.2          | 9.5          |
| <b>6a'_2</b>    | 2.9          | 4.3          | 0.0          |
| <b>6a'_3</b>    | 2.7          | 2.2          | 6.4          |
| <b>6a'_4</b>    | 0.2          | 1.1          | 2.0          |
| <b>6a'_5</b>    | 0.0          | 0.7          | 2.6          |
| <b>6a'_6</b>    | 2.4          | 1.9          | 6.4          |
| <b>6a'_7</b>    | 1.8          | 1.0          | 7.5          |
| <b>6a'_8</b>    | 3.0          | 0.7          | 12.7         |
| <b>6a'_9</b>    | 1.4          | 0.0          | 9.4          |
| <b>6a'_{10}</b> | 6.7          | 5.5          | 8.6          |

\* 80 possible conformers of intermediate **6a** were found in the Avogadro 1.93.0 program, and then the 10 most energetically favorable ones were optimized in the PRIRODA-06 (PBE/3 $\zeta$ ) program

**Table S3.** Thermodynamic and activation parameters of reaction **6**  $\rightarrow$  **7** calculated by M06-2X/cc-pVDZ method at T = 298 K ( $\Delta H$ ,  $\Delta G$  [kcal/mol]) in gas phase, THF, toluene, and dichloromethane (CPCM).

| Solvent                         | Reaction                          | $\Delta H^0$ | $\Delta G^0$ | $\Delta H^\ddagger$ | $\Delta G^\ddagger$ |
|---------------------------------|-----------------------------------|--------------|--------------|---------------------|---------------------|
| Gas phase                       | <b>6a</b> $\rightarrow$ <b>7a</b> | -13.9        | -14.0        | 2.1                 | 6.0                 |
|                                 | <b>6b</b> $\rightarrow$ <b>7b</b> | -20.3        | -22.2        | 8.2                 | 9.7                 |
| THF                             | <b>6a</b> $\rightarrow$ <b>7a</b> | -13.7        | -13.8        | 2.5                 | 6.4                 |
|                                 | <b>6b</b> $\rightarrow$ <b>7b</b> | -21.0        | -22.9        | 8.5                 | 9.9                 |
| Toluene                         | <b>6a</b> $\rightarrow$ <b>7a</b> | -13.7        | -13.8        | 2.5                 | 6.4                 |
|                                 | <b>6b</b> $\rightarrow$ <b>7b</b> | -20.7        | -22.6        | 8.4                 | 9.9                 |
| CH <sub>2</sub> Cl <sub>2</sub> | <b>6a</b> $\rightarrow$ <b>7a</b> | -13.7        | -13.8        | 2.5                 | 6.4                 |
|                                 | <b>6b</b> $\rightarrow$ <b>7b</b> | -21.1        | -23.0        | 8.5                 | 9.9                 |

### Cartesian coordinates (PBE/3c)

**3**

|    |             |             |             |
|----|-------------|-------------|-------------|
| 6  | 0.95389614  | 2.49109994  | 1.01381071  |
| 13 | 0.51431413  | 1.13768685  | -0.36859271 |
| 6  | -1.40241127 | 1.61882103  | -0.53922865 |
| 6  | -1.60287201 | 2.51187684  | 0.71563145  |
| 6  | -0.32758036 | 3.36135883  | 0.96953288  |
| 6  | 1.61085304  | -0.23980905 | -1.28338207 |
| 6  | 3.04765167  | -0.43154480 | -0.76022781 |
| 1  | -0.24090922 | 4.09299054  | 0.14533849  |
| 1  | 1.05351470  | 2.00801217  | 2.00284859  |
| 1  | -1.71406378 | 1.83801571  | 1.58904756  |
| 1  | 1.86912089  | 3.08333581  | 0.87234114  |
| 1  | -1.56177808 | 2.22474761  | -1.45255951 |
| 1  | -0.46016441 | 3.95120949  | 1.89230278  |
| 1  | 1.05652642  | -1.19417281 | -1.24025524 |
| 1  | 1.63050818  | 0.01902970  | -2.35799206 |
| 1  | 3.59853436  | -1.19671261 | -1.32943494 |
| 1  | 3.62890512  | 0.50033158  | -0.82046047 |
| 1  | 3.05695047  | -0.74305012 | 0.29471627  |
| 1  | -2.12373856 | 0.79134459  | -0.59091455 |
| 6  | -2.85556421 | 3.40258478  | 0.65972374  |
| 1  | -2.86350089 | 4.06055803  | 1.54617176  |
| 1  | -2.77053212 | 4.06886098  | -0.21690200 |
| 6  | -4.17844738 | 2.63446205  | 0.59254099  |
| 1  | -4.29085214 | 1.96482073  | 1.45913507  |
| 1  | -4.24170138 | 2.01869548  | -0.31558968 |
| 1  | -5.03698043 | 3.32112270  | 0.58953551  |

**4**

|   |             |            |             |
|---|-------------|------------|-------------|
| 9 | 1.35215225  | 0.40759772 | 0.14462021  |
| 9 | 0.20173101  | 0.31767145 | -1.84165172 |
| 5 | 0.20410054  | 0.33539530 | -0.51551482 |
| 9 | -0.94135121 | 0.27582001 | 0.15045958  |

**4'**

|    |            |             |            |
|----|------------|-------------|------------|
| 17 | 1.68926350 | -0.87473353 | 0.12119101 |
| 17 | 2.40524060 | -0.93489764 | 3.07241857 |
| 5  | 2.89828057 | -0.94354770 | 1.38953185 |
| 17 | 4.60001152 | -1.03198961 | 0.97509688 |

**5a**

|    |             |             |             |
|----|-------------|-------------|-------------|
| 6  | 0.08346562  | 1.89116266  | 1.37323019  |
| 13 | -0.10520810 | 0.90386637  | -0.34896176 |
| 6  | -1.68437265 | 1.92513196  | -0.97424778 |
| 6  | -1.65744613 | 3.15626039  | -0.02735129 |
| 6  | -1.23365093 | 2.71017912  | 1.39738313  |
| 6  | 1.07927278  | -0.38501266 | -1.27873466 |
| 6  | 2.21392227  | -1.02298860 | -0.45506850 |

|   |             |             |             |
|---|-------------|-------------|-------------|
| 1 | -1.15139876 | 3.58479893  | 2.06157746  |
| 1 | 0.26549505  | 1.36944417  | 2.32634263  |
| 1 | 0.94696376  | 2.57552096  | 1.26946662  |
| 1 | -0.86981976 | 3.84463109  | -0.39524968 |
| 1 | -2.04864167 | 2.08631220  | 1.80781137  |
| 1 | 0.43944477  | -1.16884449 | -1.72107203 |
| 1 | 1.50120278  | 0.15032314  | -2.14941196 |
| 1 | 2.83874799  | -1.69655506 | -1.06235077 |
| 1 | 2.88024784  | -0.26128681 | -0.02398858 |
| 1 | 1.82370830  | -1.61577231 | 0.38516877  |
| 1 | -2.60949041 | 1.34584417  | -0.79227168 |
| 1 | -1.71153728 | 2.22375373  | -2.03231610 |
| 6 | -2.98660829 | 3.93321151  | -0.03925791 |
| 1 | -3.26111847 | 4.12704084  | -1.08903165 |
| 1 | -3.77667937 | 3.27562496  | 0.36440574  |
| 6 | -2.97780103 | 5.26149526  | 0.72699671  |
| 1 | -2.18237601 | 5.92613992  | 0.35609095  |
| 1 | -2.81593226 | 5.11610761  | 1.80394945  |
| 1 | -3.93401320 | 5.79068815  | 0.60662725  |
| 9 | 0.10546433  | -1.49888214 | 2.83756906  |
| 5 | -1.02151742 | -0.97804974 | 2.38188981  |
| 9 | -1.30205044 | -1.05594430 | 1.07242341  |
| 9 | -1.90321965 | -0.43592524 | 3.20390738  |

### 5a'

|    |             |             |             |
|----|-------------|-------------|-------------|
| 6  | 1.21962000  | 3.31451169  | -0.16915734 |
| 13 | 0.87253372  | 1.37335310  | -0.41024259 |
| 6  | -1.05879552 | 1.44262587  | 0.04539698  |
| 6  | -1.18025603 | 2.86396791  | 0.65698591  |
| 6  | -0.23583928 | 3.84366129  | -0.09165244 |
| 6  | 1.99175713  | -0.09148718 | -1.14917626 |
| 6  | 3.51548133  | 0.13221794  | -1.14668909 |
| 1  | -0.62997927 | 3.97422152  | -1.11636050 |
| 1  | 1.74932924  | 3.51654648  | 0.77787013  |
| 1  | -0.81758580 | 2.81003291  | 1.70260714  |
| 1  | 1.80052980  | 3.81423042  | -0.95780971 |
| 1  | -1.65666169 | 1.38850981  | -0.88573360 |
| 1  | -0.28928472 | 4.83702924  | 0.38562567  |
| 1  | 1.73822442  | -1.03008322 | -0.62760081 |
| 1  | 1.63944425  | -0.24754529 | -2.18642378 |
| 1  | 4.05889075  | -0.69597884 | -1.62825000 |
| 1  | 3.79146775  | 1.05583800  | -1.67651781 |
| 1  | 3.91182050  | 0.22222663  | -0.12400867 |
| 1  | -1.45457364 | 0.66024039  | 0.70768581  |
| 6  | -2.61804346 | 3.40958389  | 0.69669762  |
| 1  | -2.59284179 | 4.45341034  | 1.05565949  |
| 1  | -3.00496355 | 3.44999263  | -0.33687664 |
| 6  | -3.57909768 | 2.60082898  | 1.57230727  |
| 1  | -3.21984479 | 2.55278984  | 2.61180498  |
| 1  | -3.68509123 | 1.56949710  | 1.20758599  |

|    |             |            |            |
|----|-------------|------------|------------|
| 1  | -4.58087869 | 3.05351369 | 1.58709865 |
| 17 | 1.60266600  | 0.28765498 | 2.60354108 |
| 17 | 4.48950542  | 0.08902227 | 3.52480126 |
| 5  | 3.03718582  | 1.03931397 | 3.30710676 |
| 17 | 2.99028218  | 2.71944827 | 3.78796896 |

**5b**

|    |             |             |             |
|----|-------------|-------------|-------------|
| 6  | 0.68610035  | 2.44027514  | 1.16181877  |
| 13 | 0.25449592  | 1.13823949  | -0.27106064 |
| 6  | -1.60237010 | 1.79463028  | -0.58390131 |
| 6  | -1.55806696 | 3.16723145  | 0.14520848  |
| 6  | -0.71509821 | 3.04239162  | 1.44271932  |
| 6  | 1.35836438  | -0.15258774 | -1.29319592 |
| 6  | 2.68560743  | -0.58506667 | -0.64063868 |
| 1  | -0.64152026 | 4.02146851  | 1.94181376  |
| 1  | 1.15778524  | 2.04350969  | 2.07217223  |
| 1  | 1.36741669  | 3.22291951  | 0.78277221  |
| 1  | -1.01942812 | 3.87439715  | -0.51752590 |
| 1  | -1.26447955 | 2.38266480  | 2.13946957  |
| 1  | 0.73586896  | -1.03548142 | -1.51958080 |
| 1  | 1.55673358  | 0.30805173  | -2.27876622 |
| 1  | 3.25645466  | -1.27780742 | -1.27875559 |
| 1  | 3.33523435  | 0.27814045  | -0.43349685 |
| 1  | 2.51785689  | -1.09328547 | 0.32048281  |
| 1  | -2.38907583 | 1.17106455  | -0.11343465 |
| 1  | -1.91360825 | 1.90072769  | -1.63413828 |
| 6  | -2.96326214 | 3.74574905  | 0.39071076  |
| 1  | -3.52349040 | 3.70379331  | -0.55774104 |
| 1  | -3.49740393 | 3.07655360  | 1.08835656  |
| 6  | -2.99683855 | 5.18239108  | 0.92566556  |
| 1  | -2.45086970 | 5.86528153  | 0.25674773  |
| 1  | -2.54510858 | 5.26171524  | 1.92399454  |
| 1  | -4.03054133 | 5.54895974  | 1.00171000  |
| 9  | -0.70694463 | -0.77829150 | 1.35630182  |
| 5  | -2.02691747 | -1.00846423 | 1.30246998  |
| 9  | -2.51632315 | -1.75712857 | 0.32924356  |
| 9  | -2.81017826 | -0.52345448 | 2.25053016  |

**5b'**

|    |             |             |             |
|----|-------------|-------------|-------------|
| 6  | 0.51418518  | 2.97463524  | -0.51706195 |
| 13 | 0.03951053  | 1.08130820  | -0.90068479 |
| 6  | -1.73335504 | 1.13308227  | 0.00117730  |
| 6  | -1.62743568 | 2.45833041  | 0.80459235  |
| 6  | -0.84887475 | 3.51713090  | -0.02224896 |
| 6  | 1.15921984  | -0.44649324 | -1.50651020 |
| 6  | 1.96225979  | -1.07041453 | -0.34241175 |
| 1  | -1.47257398 | 3.78914466  | -0.89367200 |
| 1  | 1.25509536  | 3.00602352  | 0.30273640  |
| 1  | -1.01937118 | 2.25297357  | 1.70863082  |
| 1  | 0.93855319  | 3.58235862  | -1.32889706 |



|    |             |             |             |
|----|-------------|-------------|-------------|
| 1  | -2.55492735 | 1.21536463  | -0.73496005 |
| 1  | -0.73856322 | 4.43813172  | 0.57554582  |
| 1  | 0.51917202  | -1.21732719 | -1.96615765 |
| 1  | 1.85284643  | -0.10859024 | -2.29404998 |
| 1  | 2.58021668  | -1.91990431 | -0.67362277 |
| 1  | 2.64333148  | -0.34045826 | 0.12146572  |
| 1  | 1.30160679  | -1.44608794 | 0.45422010  |
| 1  | -1.97842581 | 0.27359110  | 0.64140884  |
| 6  | -2.98134158 | 3.01461031  | 1.27806829  |
| 1  | -2.81653482 | 3.99738558  | 1.75331083  |
| 1  | -3.60847968 | 3.20368465  | 0.38882286  |
| 6  | -3.73533298 | 2.10533615  | 2.25230624  |
| 1  | -3.13323396 | 1.90544220  | 3.15205319  |
| 1  | -3.97974809 | 1.13754792  | 1.79242830  |
| 1  | -4.67801381 | 2.56708980  | 2.57923355  |
| 17 | -0.78290782 | 1.81905614  | -3.72525303 |
| 17 | -2.45377685 | 0.99510687  | -6.11396291 |
| 5  | -1.88960619 | 0.67113089  | -4.49171258 |
| 17 | -2.40058908 | -0.75650108 | -3.62676323 |

**6a**

|    |             |             |             |
|----|-------------|-------------|-------------|
| 6  | -0.35121151 | 1.75269031  | 2.03022411  |
| 13 | -0.47157607 | 0.26123627  | -0.50106715 |
| 6  | -1.69904750 | 1.76188494  | -0.88005515 |
| 6  | -1.69925120 | 2.91572057  | 0.15506256  |
| 6  | -1.70689080 | 2.35583847  | 1.59337249  |
| 6  | 1.21616046  | -0.21070195 | -1.40340609 |
| 6  | 2.02883263  | -1.35868308 | -0.77443573 |
| 1  | -1.98080652 | 3.14677780  | 2.30531078  |
| 1  | 0.20733441  | 2.48444810  | 2.64197536  |
| 1  | 0.34771201  | 1.62879319  | 1.17006616  |
| 1  | -0.76658385 | 3.49718044  | 0.02524422  |
| 1  | -2.50089380 | 1.59514995  | 1.66280261  |
| 1  | 0.95709214  | -0.45775754 | -2.44963001 |
| 1  | 1.83152371  | 0.70287816  | -1.48140289 |
| 1  | 2.93306245  | -1.58665635 | -1.35937249 |
| 1  | 2.35093580  | -1.11505832 | 0.24773388  |
| 1  | 1.43667238  | -2.28180011 | -0.70625725 |
| 1  | -2.71729378 | 1.33096804  | -0.91528208 |
| 1  | -1.50146665 | 2.16497391  | -1.88722584 |
| 6  | -2.87770548 | 3.87823394  | -0.09644644 |
| 1  | -2.92877942 | 4.08275796  | -1.17800212 |
| 1  | -3.81753178 | 3.35841942  | 0.15882462  |
| 6  | -2.79729314 | 5.21047976  | 0.65674745  |
| 1  | -1.87263980 | 5.75143967  | 0.40457270  |
| 1  | -2.81830898 | 5.07454343  | 1.74732578  |
| 1  | -3.64364090 | 5.86066042  | 0.39428451  |
| 9  | 0.72550000  | -0.31654557 | 3.02870305  |
| 5  | -0.38843782 | 0.40683435  | 2.85108621  |
| 9  | -1.02478049 | -0.83987568 | 0.68146791  |

9 -1.47437860 0.02264542 3.52665278

**6a + THF**

6 1.61368795 3.72521340 0.98318122  
13 0.67122226 0.58420515 -0.39726111  
6 -0.73545844 1.99548322 -0.28918706  
6 -0.85569189 2.86545452 0.98752279  
6 0.11466106 4.06279830 0.97130706  
6 2.27734459 0.69396030 -1.57286115  
6 2.98896477 -0.63738075 -1.88271735  
1 -0.10561219 4.67076746 0.07643347  
1 2.18976218 4.65351748 0.78220662  
1 -0.61242584 2.24345532 1.86829535  
1 1.89444491 3.07565691 0.13725493  
1 -0.68963243 2.66200230 -1.17153523  
1 -0.10634568 4.70357675 1.83967133  
1 2.01473406 1.20949168 -2.51489851  
1 2.99788272 1.36941876 -1.07850347  
1 3.90483810 -0.49678566 -2.47876346  
1 3.27979979 -1.15907679 -0.95883054  
1 2.34537378 -1.32672168 -2.45400551  
1 -1.67652586 1.42561478 -0.40484935  
6 -2.29045530 3.39841803 1.20035050  
1 -2.27233957 4.13042945 2.02576279  
1 -2.60123883 3.95712185 0.29981521  
6 -3.33255838 2.32551019 1.52980090  
1 -3.04770592 1.76656874 2.43367161  
1 -3.44969657 1.59813704 0.71325401  
1 -4.31850216 2.77731205 1.70947700  
17 1.06893018 -0.38926735 1.52309353  
17 3.90019803 2.49411805 2.25207184  
5 2.26854169 3.18529982 2.29739604  
17 1.51384325 3.35822407 3.88866821  
6 -0.61815147 -3.07314358 -2.20390611  
6 -1.55607461 -2.08934061 -2.92087730  
6 -0.28133625 -2.34353195 -0.90846028  
6 -0.91244621 -0.74721347 -2.60604200  
1 0.28948779 -3.24142899 -2.80064284  
1 -1.00935269 -2.53189956 -0.10868280  
1 -2.56919182 -2.13797807 -2.49690638  
1 -1.60830943 0.10031019 -2.58659286  
1 -1.62223408 -2.26853148 -4.00112227  
1 -0.07129496 -0.52141660 -3.27956292  
1 0.72928868 -2.52587807 -0.52877026  
1 -1.08770587 -4.04510024 -2.00879955  
8 -0.38596387 -0.90550397 -1.24431579

**6a + 2THF**

6 1.88890042 3.77410829 1.04780135  
13 0.56863671 0.06977622 0.47342924

|    |             |             |             |
|----|-------------|-------------|-------------|
| 6  | -0.52876867 | 1.73249408  | 0.54178364  |
| 6  | -0.42649812 | 2.71969955  | 1.73964308  |
| 6  | 0.39424868  | 3.97509614  | 1.38347144  |
| 6  | 2.30595972  | -0.13816270 | -0.50539388 |
| 6  | 3.32145762  | -1.13944669 | 0.07641214  |
| 1  | -0.09943365 | 4.46030433  | 0.52190833  |
| 1  | 2.24579245  | 4.72035990  | 0.59857001  |
| 1  | 0.06414721  | 2.22151818  | 2.59274328  |
| 1  | 1.98410232  | 3.01197791  | 0.25453799  |
| 1  | -0.40671562 | 2.30297341  | -0.39934702 |
| 1  | 2.08531250  | -0.40790047 | -1.55602679 |
| 1  | 2.77132414  | 0.86084426  | -0.56923945 |
| 1  | 4.25362033  | -1.18869641 | -0.51168182 |
| 1  | 3.59061559  | -0.87582252 | 1.10906485  |
| 1  | 2.91094195  | -2.15936673 | 0.11975460  |
| 1  | -1.56207892 | 1.33901260  | 0.50173531  |
| 17 | 0.31389530  | -1.28455954 | 2.17087352  |
| 17 | 2.80763949  | 1.62809337  | 2.81944349  |
| 5  | 2.84966948  | 3.40666508  | 2.27505655  |
| 17 | 2.72397258  | 4.56131455  | 3.72969120  |
| 6  | -0.85146144 | -2.72512729 | -2.39940776 |
| 6  | -1.76249496 | -1.55363891 | -2.79762974 |
| 6  | -0.55622146 | -2.44052810 | -0.92955518 |
| 6  | -1.12549004 | -0.39063312 | -2.05156296 |
| 1  | 0.07494333  | -2.70593515 | -2.99097236 |
| 1  | -1.29845860 | -2.87648441 | -0.24867495 |
| 1  | -2.78908705 | -1.72040456 | -2.44129199 |
| 1  | -1.81247913 | 0.42486823  | -1.79797877 |
| 1  | -1.79333822 | -1.38048089 | -3.88062098 |
| 1  | -0.25483114 | 0.01595092  | -2.59105048 |
| 1  | 0.44704240  | -2.73893856 | -0.60415967 |
| 1  | -1.32737866 | -3.70407579 | -2.53537905 |
| 8  | -0.66464966 | -0.97426217 | -0.78889677 |
| 6  | 6.30752202  | 3.37634425  | 0.41515951  |
| 6  | 5.90660446  | 4.85959628  | 0.40894797  |
| 6  | 5.00422709  | 2.69365793  | 0.78425432  |
| 6  | 4.96474165  | 4.97708413  | 1.60333313  |
| 1  | 7.07346168  | 3.17873708  | 1.17829103  |
| 1  | 4.30584005  | 2.63722533  | -0.06247859 |
| 1  | 5.37899596  | 5.10576251  | -0.52338528 |
| 1  | 4.11592591  | 5.65032955  | 1.44911446  |
| 1  | 6.76387564  | 5.53688940  | 0.50795103  |
| 1  | 5.47242634  | 5.23639014  | 2.53856223  |
| 1  | 5.09588736  | 1.71406279  | 1.25966802  |
| 1  | 6.68406006  | 3.03010016  | -0.55542108 |
| 8  | 4.42834081  | 3.60077314  | 1.80360248  |
| 1  | 0.32629170  | 4.68929344  | 2.21956787  |
| 6  | -1.82037313 | 3.16400248  | 2.23476248  |
| 1  | -1.69039899 | 3.98727857  | 2.95762474  |
| 1  | -2.38377885 | 3.58453058  | 1.38237358  |

|   |             |            |            |
|---|-------------|------------|------------|
| 6 | -2.63648782 | 2.05355301 | 2.90341383 |
| 1 | -2.10802182 | 1.65687495 | 3.78258293 |
| 1 | -2.81762224 | 1.20715979 | 2.22500644 |
| 1 | -3.61555907 | 2.42728154 | 3.23682642 |

**6a'**

|    |             |             |             |
|----|-------------|-------------|-------------|
| 6  | 1.46782119  | 3.84857366  | 0.42727675  |
| 13 | 0.88051981  | 0.37600815  | 0.12501442  |
| 6  | -0.64616777 | 1.64072186  | -0.03949026 |
| 6  | -0.87051699 | 2.77932362  | 0.98416538  |
| 6  | -0.06614299 | 4.04207367  | 0.62288267  |
| 6  | 2.26037923  | 0.09924983  | -1.26830171 |
| 6  | 3.41534814  | -0.85920795 | -0.92740195 |
| 1  | -0.46662054 | 4.45634142  | -0.31757930 |
| 1  | 1.90026336  | 4.82105598  | 0.14591788  |
| 1  | -0.54481657 | 2.43883609  | 1.98627132  |
| 1  | 1.64084652  | 3.15665241  | -0.41081839 |
| 1  | -0.64498407 | 2.07020297  | -1.05843374 |
| 1  | -0.23122674 | 4.80879830  | 1.39626913  |
| 1  | 1.71443904  | -0.27489325 | -2.15460286 |
| 1  | 2.65813645  | 1.08163654  | -1.57851912 |
| 1  | 4.09827452  | -1.00142168 | -1.77940609 |
| 1  | 4.01917468  | -0.48379709 | -0.08779297 |
| 1  | 3.04155004  | -1.84950018 | -0.63203941 |
| 1  | -1.51337391 | 0.95751445  | -0.00884820 |
| 6  | -2.35910923 | 3.16886282  | 1.11992350  |
| 1  | -2.42767993 | 4.10017630  | 1.70848304  |
| 1  | -2.75343145 | 3.40711379  | 0.11691526  |
| 6  | -3.23548497 | 2.10408529  | 1.78520168  |
| 1  | -2.87461714 | 1.87335896  | 2.79854430  |
| 1  | -3.24797476 | 1.16367242  | 1.21655218  |
| 1  | -4.27485465 | 2.45045622  | 1.87019250  |
| 17 | 0.48719829  | -1.31426683 | 1.41775870  |
| 17 | 2.41459828  | 1.57729526  | 2.00259974  |
| 5  | 2.16516965  | 3.33775804  | 1.71771900  |
| 17 | 2.71976081  | 4.39474918  | 3.00633345  |

**6a'\_1**

|    |             |            |             |
|----|-------------|------------|-------------|
| 6  | -0.44635160 | 4.59358816 | -0.77223570 |
| 13 | 1.13985658  | 1.01403426 | -0.39007037 |
| 6  | -0.74271885 | 1.52970464 | -0.07853614 |
| 6  | -0.95815625 | 2.67366557 | 0.93739905  |
| 6  | -0.12796166 | 3.92995021 | 0.58840808  |
| 6  | 1.98560242  | 0.70234684 | -2.14504949 |
| 6  | 3.43998392  | 0.19950056 | -2.15397087 |
| 1  | -0.24493628 | 4.67557704 | 1.39020312  |
| 1  | -0.42833164 | 3.85623743 | -1.58812226 |
| 1  | -0.56558612 | 2.32643722 | 1.91025404  |
| 1  | 0.37800884  | 5.29918520 | -0.99960929 |
| 1  | -1.21361995 | 1.77014342 | -1.04770707 |

|    |             |             |             |
|----|-------------|-------------|-------------|
| 1  | 0.94218522  | 3.65025413  | 0.60024495  |
| 1  | 1.32987900  | 0.00038301  | -2.69180994 |
| 1  | 1.90393094  | 1.64974603  | -2.70887738 |
| 1  | 3.81628900  | 0.05810760  | -3.17870631 |
| 1  | 4.11412774  | 0.90509865  | -1.64878129 |
| 1  | 3.53821798  | -0.76173674 | -1.63038501 |
| 1  | -1.25794139 | 0.61954783  | 0.27620229  |
| 6  | -2.44549779 | 3.01775953  | 1.15286095  |
| 1  | -2.50879427 | 3.87708918  | 1.84044054  |
| 1  | -2.88851691 | 3.34995680  | 0.19661691  |
| 6  | -3.28988196 | 1.87084665  | 1.71645554  |
| 1  | -2.86595164 | 1.49830791  | 2.66149180  |
| 1  | -3.35209285 | 1.02479316  | 1.01817323  |
| 1  | -4.31673100 | 2.20485630  | 1.91957742  |
| 17 | 2.34020827  | 0.69889483  | 1.36055594  |
| 17 | -2.11785580 | 6.70016766  | 0.34481794  |
| 5  | -1.72912269 | 5.48188971  | -0.88194349 |
| 17 | -2.78321125 | 5.41414721  | -2.30542718 |

**6a'\_2**

|    |             |             |             |
|----|-------------|-------------|-------------|
| 6  | -0.20514290 | 4.92603754  | -0.53582525 |
| 13 | -1.06608176 | 1.92609516  | -2.07933516 |
| 6  | -0.46974900 | 1.87197248  | -0.17368365 |
| 6  | -0.90714411 | 2.84808797  | 0.94134788  |
| 6  | -0.19423178 | 4.21296671  | 0.85024270  |
| 6  | -2.60722907 | 0.88764782  | -2.76221929 |
| 6  | -2.92355714 | 0.99559951  | -4.26435396 |
| 1  | -0.61915708 | 4.88988800  | 1.60829796  |
| 1  | 0.36415270  | 4.32237728  | -1.25887796 |
| 1  | -0.56337748 | 2.42351643  | 1.90503005  |
| 1  | 0.34249973  | 5.87547350  | -0.40995169 |
| 1  | -0.75374686 | 0.84725180  | 0.13013571  |
| 1  | 0.86483672  | 4.07248929  | 1.11637100  |
| 1  | -2.38779603 | -0.16563816 | -2.50482710 |
| 1  | -3.49663928 | 1.14678946  | -2.16182028 |
| 1  | -3.75979000 | 0.34179870  | -4.55707245 |
| 1  | -3.20064759 | 2.02103395  | -4.55159501 |
| 1  | -2.05473146 | 0.71900841  | -4.87774218 |
| 1  | 0.63369675  | 1.85591477  | -0.22080986 |
| 6  | -2.43354174 | 2.99523185  | 1.08066100  |
| 1  | -2.63986270 | 3.72173722  | 1.88393875  |
| 1  | -2.86394213 | 3.42700092  | 0.15975123  |
| 6  | -3.16488754 | 1.68598776  | 1.39484166  |
| 1  | -2.75787821 | 1.22113667  | 2.30579177  |
| 1  | -3.07306761 | 0.95791372  | 0.57711261  |
| 1  | -4.23680169 | 1.86287739  | 1.55927261  |
| 17 | 0.55026324  | 2.27328907  | -3.48053534 |
| 17 | -2.58001313 | 6.63075832  | -0.56058979 |
| 5  | -1.60220088 | 5.27778243  | -1.11322792 |
| 17 | -2.30081197 | 4.31822405  | -2.47640801 |

**6a'\_3**

|    |             |             |             |
|----|-------------|-------------|-------------|
| 6  | -0.63595166 | 4.82327267  | -0.71602780 |
| 13 | -1.47386031 | -0.20187462 | -0.51844894 |
| 6  | -0.82074835 | 1.64602275  | -0.77480796 |
| 6  | -0.83055447 | 2.51407861  | 0.50391367  |
| 6  | -0.06170582 | 3.84713143  | 0.33526805  |
| 6  | -0.74558462 | -1.54187965 | 0.73641581  |
| 6  | -1.74311478 | -2.58335640 | 1.27889655  |
| 1  | -0.00656212 | 4.35560154  | 1.31150992  |
| 1  | -0.82161162 | 4.31040409  | -1.67078404 |
| 1  | -0.27856123 | 1.96524843  | 1.29112786  |
| 1  | 0.15146058  | 5.57091889  | -0.94272099 |
| 1  | 0.21174381  | 1.58548190  | -1.16472852 |
| 1  | 0.97441673  | 3.60094000  | 0.05510972  |
| 1  | 0.06703078  | -2.05832087 | 0.19252871  |
| 1  | -0.24383160 | -1.01573611 | 1.56638915  |
| 1  | -1.24848201 | -3.32642428 | 1.92300967  |
| 1  | -2.53835692 | -2.11307719 | 1.87641971  |
| 1  | -2.23692129 | -3.12842687 | 0.46242060  |
| 1  | -1.42114630 | 2.11520643  | -1.57203412 |
| 6  | -2.25534083 | 2.73417622  | 1.04481304  |
| 1  | -2.19764865 | 3.35254711  | 1.95416398  |
| 1  | -2.84943914 | 3.30834655  | 0.31273906  |
| 6  | -3.00939589 | 1.44284319  | 1.37616010  |
| 1  | -2.40949777 | 0.77379776  | 2.01384946  |
| 1  | -3.33297349 | 0.89742503  | 0.46687664  |
| 1  | -3.94441842 | 1.64736501  | 1.91640903  |
| 17 | -2.93134530 | -0.92467620 | -1.92751625 |
| 17 | -1.97398644 | 6.50849257  | 1.25191562  |
| 5  | -1.86527759 | 5.70569665  | -0.32696680 |
| 17 | -3.15801530 | 6.05496534  | -1.48781095 |

**6a'\_4**

|    |             |             |             |
|----|-------------|-------------|-------------|
| 6  | 1.45931779  | 4.19623127  | 1.04066569  |
| 13 | 1.29868541  | 1.05608096  | -0.52766828 |
| 6  | -0.32206869 | 2.21356833  | -0.42908336 |
| 6  | -0.75703509 | 2.85857824  | 0.90334293  |
| 6  | -0.08813598 | 4.22462774  | 1.13217426  |
| 6  | 1.71270988  | -0.01601250 | -2.13686112 |
| 6  | 3.07445926  | -0.73234771 | -2.17043866 |
| 1  | -0.48676500 | 4.95306542  | 0.40616409  |
| 1  | 1.86017543  | 3.37239614  | 1.64939621  |
| 1  | -0.44498360 | 2.19714841  | 1.73229253  |
| 1  | 1.84275352  | 5.13514998  | 1.48391775  |
| 1  | -0.37385559 | 2.95197606  | -1.24956571 |
| 1  | -0.37185460 | 4.59333262  | 2.12970611  |
| 1  | 0.89971755  | -0.76204257 | -2.20934474 |
| 1  | 1.59211945  | 0.62842545  | -3.02431911 |
| 1  | 3.18541548  | -1.36041339 | -3.06785769 |

|    |             |             |             |
|----|-------------|-------------|-------------|
| 1  | 3.91107310  | -0.01770607 | -2.17240077 |
| 1  | 3.21039149  | -1.38064946 | -1.29333447 |
| 1  | -1.07297148 | 1.45121070  | -0.72091405 |
| 6  | -2.28879781 | 3.03169127  | 1.01068385  |
| 1  | -2.50999930 | 3.65574574  | 1.89351719  |
| 1  | -2.64400401 | 3.60157303  | 0.13480928  |
| 6  | -3.07197514 | 1.72136927  | 1.13109368  |
| 1  | -2.73919571 | 1.14139045  | 2.00482478  |
| 1  | -2.95180006 | 1.08374221  | 0.24334687  |
| 1  | -4.14714583 | 1.91645589  | 1.24786673  |
| 17 | 1.97404052  | 0.26937930  | 1.36950333  |
| 17 | 1.68304237  | 5.40246708  | -1.60518001 |
| 5  | 2.02955170  | 4.16322347  | -0.40316173 |
| 17 | 3.20534497  | 2.88471266  | -0.92869558 |

**6a'\_5**

|    |             |             |             |
|----|-------------|-------------|-------------|
| 6  | 1.42213822  | 3.31734724  | 0.33567472  |
| 13 | -1.61809191 | 1.98225928  | -1.88242543 |
| 6  | -1.18664489 | 1.68953619  | 0.03870262  |
| 6  | -1.02799577 | 2.86527461  | 1.02282799  |
| 6  | 0.00679103  | 3.89602244  | 0.53455672  |
| 6  | -1.69628446 | 0.45887600  | -3.14022891 |
| 6  | -1.74642298 | 0.79090123  | -4.64230609 |
| 1  | -0.34829180 | 4.35696134  | -0.40173234 |
| 1  | 1.76223915  | 2.79556993  | 1.24441559  |
| 1  | -0.65368937 | 2.46386283  | 1.98650224  |
| 1  | 2.13169486  | 4.16361362  | 0.21487715  |
| 1  | -1.94730933 | 0.98401361  | 0.41790672  |
| 1  | 0.06692444  | 4.70921319  | 1.27495990  |
| 1  | -0.84833662 | -0.21233392 | -2.91991394 |
| 1  | -2.59734031 | -0.11683279 | -2.85736495 |
| 1  | -1.85560739 | -0.11443953 | -5.25939565 |
| 1  | -2.58768267 | 1.45743764  | -4.87874505 |
| 1  | -0.83083680 | 1.30121067  | -4.97571952 |
| 1  | -0.26436348 | 1.07355494  | 0.03700019  |
| 6  | -2.36171649 | 3.57614483  | 1.32804024  |
| 1  | -2.14458357 | 4.44863715  | 1.96712196  |
| 1  | -2.78121864 | 3.97510169  | 0.39042283  |
| 6  | -3.40383018 | 2.70128758  | 2.03125314  |
| 1  | -3.00331457 | 2.27577457  | 2.96431598  |
| 1  | -3.73793543 | 1.86674361  | 1.39873053  |
| 1  | -4.29609161 | 3.28908817  | 2.28880973  |
| 17 | -2.62015822 | 3.78456628  | -2.52648840 |
| 17 | 0.95751745  | 2.76509827  | -2.51225516 |
| 5  | 1.72096440  | 2.43272786  | -0.90623873 |
| 17 | 2.93318693  | 1.15527148  | -0.89815408 |

**6a'\_6**

|    |            |            |             |
|----|------------|------------|-------------|
| 6  | 0.01966346 | 4.87957498 | 1.46408199  |
| 13 | 0.92869853 | 0.94572496 | -0.14034397 |

|    |             |             |             |
|----|-------------|-------------|-------------|
| 6  | -0.96701398 | 1.54199797  | -0.11905422 |
| 6  | -1.26108543 | 2.73752103  | 0.81023121  |
| 6  | -0.52078972 | 4.00853918  | 0.32235410  |
| 6  | 2.28491504  | 1.32454334  | -1.52957491 |
| 6  | 2.23924399  | 0.30115210  | -2.68630515 |
| 1  | 0.31530486  | 3.72965854  | -0.33923426 |
| 1  | -0.78213613 | 5.14942490  | 2.17459849  |
| 1  | -0.87812904 | 2.48646279  | 1.81796578  |
| 1  | 0.36589974  | 5.86013503  | 1.08107393  |
| 1  | -1.26648878 | 1.80396538  | -1.15097666 |
| 1  | -1.20466976 | 4.60308190  | -0.30478564 |
| 1  | 2.13699944  | 2.34349657  | -1.92465913 |
| 1  | 3.28426848  | 1.31305000  | -1.06575665 |
| 1  | 3.00406601  | 0.51290874  | -3.44965889 |
| 1  | 2.41527987  | -0.72317198 | -2.32612458 |
| 1  | 1.26502262  | 0.30268996  | -3.19915656 |
| 1  | -1.57394230 | 0.66819165  | 0.16941569  |
| 6  | -2.76792551 | 3.03271807  | 0.97528608  |
| 1  | -2.88558812 | 3.98875139  | 1.51568643  |
| 1  | -3.20110983 | 3.19263795  | -0.02721143 |
| 6  | -3.55547856 | 1.94961377  | 1.71623343  |
| 1  | -3.14288156 | 1.77775829  | 2.72184767  |
| 1  | -3.53561436 | 0.99078513  | 1.17989103  |
| 1  | -4.60906872 | 2.23958262  | 1.83275061  |
| 17 | 1.37957428  | -0.70954559 | 1.16624907  |
| 17 | 2.12811876  | 2.84645165  | 1.79177356  |
| 5  | 1.21873427  | 4.31040063  | 2.28322385  |
| 17 | 1.81109747  | 5.11604604  | 3.73418340  |

### 6a'\_7

|    |             |             |             |
|----|-------------|-------------|-------------|
| 6  | 0.12540639  | 4.78697308  | 1.51180141  |
| 13 | 0.79819200  | 0.84287497  | -0.29220248 |
| 6  | -1.04190792 | 1.58775874  | -0.24452770 |
| 6  | -1.24952458 | 2.73411653  | 0.76813086  |
| 6  | -0.45987933 | 3.99437202  | 0.33502366  |
| 6  | 2.14222786  | 1.14226366  | -1.71021583 |
| 6  | 3.55681783  | 0.58168461  | -1.48272735 |
| 1  | 0.36063790  | 3.71140823  | -0.34399363 |
| 1  | -0.65536099 | 5.04100389  | 2.25074215  |
| 1  | -0.85347427 | 2.40255852  | 1.74709625  |
| 1  | 0.49432210  | 5.77582877  | 1.17424309  |
| 1  | -1.31711261 | 1.94116514  | -1.25510454 |
| 1  | -1.12320181 | 4.64473368  | -0.25785493 |
| 1  | 1.70298664  | 0.69417034  | -2.62185588 |
| 1  | 2.18244173  | 2.22447134  | -1.92485040 |
| 1  | 4.20850013  | 0.74703257  | -2.35464701 |
| 1  | 4.04582470  | 1.05186485  | -0.61727013 |
| 1  | 3.53382953  | -0.49915831 | -1.28596941 |
| 1  | -1.71278241 | 0.74278273  | -0.01613627 |
| 6  | -2.73518045 | 3.09001455  | 0.99483005  |



|    |             |             |            |
|----|-------------|-------------|------------|
| 1  | -2.79176682 | 4.02067465  | 1.58679190 |
| 1  | -3.18910131 | 3.32197222  | 0.01589813 |
| 6  | -3.55098777 | 2.00690549  | 1.70450064 |
| 1  | -3.12426699 | 1.77281673  | 2.69141253 |
| 1  | -3.58155357 | 1.07312968  | 1.12587546 |
| 1  | -4.58922696 | 2.33276729  | 1.85788196 |
| 17 | 1.14973937  | -0.80647434 | 1.04836098 |
| 17 | 2.18138329  | 2.68595313  | 1.67903742 |
| 5  | 1.32199812  | 4.13844250  | 2.27489362 |
| 17 | 1.95572057  | 4.84088456  | 3.76240113 |

**6a'\_8**

|    |             |             |             |
|----|-------------|-------------|-------------|
| 6  | -0.33486399 | 5.19576485  | 1.63976869  |
| 13 | -0.84794460 | 1.76969757  | -1.88769985 |
| 6  | -0.41953289 | 1.60990389  | 0.04270246  |
| 6  | -0.91138890 | 2.75752852  | 0.95500455  |
| 6  | -0.18178588 | 4.06968926  | 0.60136936  |
| 6  | -2.41193828 | 0.97387916  | -2.79292341 |
| 6  | -2.57965698 | 1.24734229  | -4.29771095 |
| 1  | 0.88828290  | 3.85439192  | 0.46377624  |
| 1  | -1.38803791 | 5.47709643  | 1.78897193  |
| 1  | -0.64526468 | 2.50100269  | 1.99934748  |
| 1  | 0.13630840  | 6.11482083  | 1.23454238  |
| 1  | -0.83139130 | 0.64730309  | 0.38930518  |
| 1  | -0.54487445 | 4.43085975  | -0.37781855 |
| 1  | -2.35677435 | -0.11456483 | -2.60479687 |
| 1  | -3.30943186 | 1.30194828  | -2.23803660 |
| 1  | -3.46497359 | 0.73864945  | -4.70915242 |
| 1  | -2.69171873 | 2.32139050  | -4.50216359 |
| 1  | -1.70556866 | 0.90619659  | -4.86953916 |
| 1  | 0.67621696  | 1.52239555  | 0.13189269  |
| 6  | -2.44161307 | 2.92949475  | 0.90801184  |
| 1  | -2.73064033 | 3.78889529  | 1.53311704  |
| 1  | -2.73815617 | 3.19917324  | -0.12507328 |
| 6  | -3.24157555 | 1.70618276  | 1.36644058  |
| 1  | -2.94863656 | 1.40676959  | 2.38396322  |
| 1  | -3.08971281 | 0.84074505  | 0.70681513  |
| 1  | -4.31859080 | 1.92368360  | 1.38049003  |
| 17 | 0.57188027  | 2.78908768  | -3.13369190 |
| 17 | 1.83937090  | 4.05447970  | 3.22519839  |
| 5  | 0.35409935  | 4.99832424  | 3.03020492  |
| 17 | -0.28208643 | 5.79748832  | 4.47771445  |

**6a'\_9**

|    |             |             |             |
|----|-------------|-------------|-------------|
| 6  | -0.27681730 | 4.95387050  | 1.93483434  |
| 13 | -1.33225358 | 0.05843036  | -0.51753848 |
| 6  | -0.72696875 | 1.93949489  | -0.57130929 |
| 6  | -0.95542469 | 2.74284688  | 0.72782653  |
| 6  | -0.28150272 | 4.12863745  | 0.63178219  |
| 6  | -0.71488322 | -1.33257881 | 0.74104328  |

|    |             |             |             |
|----|-------------|-------------|-------------|
| 6  | -1.69220252 | -2.48852551 | 1.02639608  |
| 1  | 0.75778799  | 3.98561576  | 0.29978238  |
| 1  | -1.29587014 | 5.18925869  | 2.27456452  |
| 1  | -0.47278950 | 2.19800969  | 1.56272270  |
| 1  | 0.17616394  | 5.94260148  | 1.71470243  |
| 1  | 0.35267377  | 1.93624741  | -0.80574884 |
| 1  | -0.78249853 | 4.70705093  | -0.16257329 |
| 1  | 0.22116765  | -1.73580395 | 0.31201339  |
| 1  | -0.40810922 | -0.84315989 | 1.68113874  |
| 1  | -1.24462639 | -3.25007671 | 1.68322024  |
| 1  | -2.60927340 | -2.13265519 | 1.51908976  |
| 1  | -2.00217673 | -2.99052331 | 0.09933412  |
| 1  | -1.21902012 | 2.44810635  | -1.41874941 |
| 6  | -2.45414514 | 2.86220653  | 1.06789659  |
| 1  | -2.57268504 | 3.42141994  | 2.00839148  |
| 1  | -2.95305851 | 3.46068425  | 0.28651044  |
| 6  | -3.17852915 | 1.52118498  | 1.21896632  |
| 1  | -2.63834354 | 0.83945764  | 1.89538886  |
| 1  | -3.34886305 | 1.01980500  | 0.24500516  |
| 1  | -4.18743593 | 1.64987334  | 1.63585493  |
| 17 | -2.55873120 | -0.61869054 | -2.15293839 |
| 17 | 2.09984673  | 3.55343561  | 2.88878186  |
| 5  | 0.56825963  | 4.41023389  | 3.13284005  |
| 17 | 0.07329866  | 4.70075234  | 4.80862132  |

### 6a'\_10

|    |             |             |             |
|----|-------------|-------------|-------------|
| 6  | -0.43525371 | 4.74784530  | -0.86222957 |
| 13 | 1.19429554  | 1.08636164  | -0.40927965 |
| 6  | -0.68146265 | 1.64132784  | -0.12793716 |
| 6  | -0.89045957 | 2.79489185  | 0.87726860  |
| 6  | -0.10648054 | 4.07231781  | 0.48703776  |
| 6  | 2.02849374  | 0.66016980  | -2.14533981 |
| 6  | 3.44827620  | 0.06740978  | -2.12990153 |
| 1  | -0.21337153 | 4.81134595  | 1.29599857  |
| 1  | -0.59977884 | 4.01091619  | -1.66340226 |
| 1  | -0.41655577 | 2.47957256  | 1.82326660  |
| 1  | 0.46491369  | 5.30472286  | -1.19928945 |
| 1  | -1.13063048 | 1.86970284  | -1.10878537 |
| 1  | 0.96561076  | 3.80026951  | 0.48457315  |
| 1  | 1.33134041  | -0.01478751 | -2.67431713 |
| 1  | 2.00877730  | 1.59292101  | -2.73887991 |
| 1  | 3.82314566  | -0.12117966 | -3.14750510 |
| 1  | 4.16120910  | 0.74075493  | -1.63418742 |
| 1  | 3.48183199  | -0.88575606 | -1.58377826 |
| 1  | -1.22197184 | 0.74526452  | 0.23244377  |
| 6  | -2.38155465 | 3.02487889  | 1.23744237  |
| 1  | -2.69781693 | 2.17927805  | 1.87068728  |
| 1  | -2.45159030 | 3.91933189  | 1.87811315  |
| 6  | -3.38352159 | 3.14174724  | 0.08344392  |
| 1  | -3.40854724 | 2.22822389  | -0.52690982 |

|    |             |            |             |
|----|-------------|------------|-------------|
| 1  | -3.16951835 | 3.98006705 | -0.59483249 |
| 1  | -4.39698486 | 3.30268949 | 0.47706386  |
| 17 | 2.40138967  | 0.87658490 | 1.35227635  |
| 17 | -1.99411223 | 6.84486543 | 0.45824745  |
| 5  | -1.54154184 | 5.84992574 | -0.93370240 |
| 17 | -2.29985114 | 6.25372626 | -2.48559549 |

**6b**

|    |             |             |             |
|----|-------------|-------------|-------------|
| 6  | 0.17035345  | 1.72819660  | 1.75777240  |
| 13 | 0.38872803  | 0.38156285  | 0.33882478  |
| 6  | -1.65253098 | 2.49464474  | -0.68609052 |
| 6  | -1.63378567 | 3.23933242  | 0.66844082  |
| 6  | -1.24485597 | 2.33859369  | 1.85750593  |
| 6  | 2.00214104  | -0.14736189 | -0.66089120 |
| 6  | 3.30961986  | 0.56676377  | -0.26976012 |
| 1  | -1.31319542 | 2.94005841  | 2.77771966  |
| 1  | 0.42222832  | 1.23763068  | 2.71570459  |
| 1  | 0.92458033  | 2.52638541  | 1.64028212  |
| 1  | -0.85643378 | 4.02323433  | 0.58834261  |
| 1  | -1.99474211 | 1.53708377  | 1.95823772  |
| 1  | 2.10883742  | -1.24043079 | -0.54760215 |
| 1  | 1.79131901  | -0.00366676 | -1.73497969 |
| 1  | 4.16379258  | 0.21527215  | -0.86835475 |
| 1  | 3.24017759  | 1.65495929  | -0.41447135 |
| 1  | 3.56554642  | 0.40117927  | 0.78718280  |
| 1  | -1.89530031 | 3.22042690  | -1.48582853 |
| 1  | -0.63037841 | 2.17896842  | -0.98784015 |
| 6  | -2.97554803 | 3.96713883  | 0.90391500  |
| 1  | -3.26348173 | 4.47421191  | -0.03238345 |
| 1  | -3.76401191 | 3.22516533  | 1.10581602  |
| 6  | -2.94538939 | 5.00822810  | 2.02829710  |
| 1  | -2.15376569 | 5.75363192  | 1.85730816  |
| 1  | -2.76966076 | 4.55188517  | 3.01195256  |
| 1  | -3.90227655 | 5.54567906  | 2.08479026  |
| 9  | -1.02774163 | -0.49874811 | -0.01075053 |
| 5  | -2.64394970 | 1.28364642  | -0.91944968 |
| 9  | -2.65587182 | 0.66877883  | -2.10995699 |
| 9  | -3.60652740 | 0.93637080  | -0.05799500 |

**6b + THF**

|    |             |             |             |
|----|-------------|-------------|-------------|
| 6  | 1.44174461  | 3.86578376  | 0.56593504  |
| 13 | 0.53060350  | 0.20722456  | -0.08087065 |
| 6  | -0.82065981 | 1.67044551  | 0.05243940  |
| 6  | -0.79970281 | 2.69133993  | 1.21650469  |
| 6  | -0.07455397 | 4.01608806  | 0.91142147  |
| 6  | 2.32706591  | 0.35593518  | -0.93488611 |
| 6  | 2.98503748  | -0.97131734 | -1.35990783 |
| 1  | -0.54570309 | 4.42120966  | -0.00428673 |
| 1  | 1.77409986  | 4.76759019  | 0.03228369  |
| 1  | -0.38480189 | 2.23556342  | 2.12960932  |

|    |             |             |             |
|----|-------------|-------------|-------------|
| 1  | 1.54311748  | 3.02954363  | -0.14900361 |
| 1  | -0.89470748 | 2.22195367  | -0.90449853 |
| 1  | 2.27452261  | 1.04095971  | -1.80103277 |
| 1  | 2.99042388  | 0.86223776  | -0.21249511 |
| 1  | 3.99950119  | -0.82753521 | -1.76503952 |
| 1  | 3.06896133  | -1.66507190 | -0.51025336 |
| 1  | 2.40455403  | -1.48758237 | -2.14223035 |
| 1  | -1.76430812 | 1.09682671  | 0.12222237  |
| 1  | -1.83624330 | 2.96947122  | 1.47375590  |
| 17 | 0.48016448  | -1.16797839 | 1.62019209  |
| 17 | 2.39746569  | 2.10937558  | 2.70627209  |
| 5  | 2.42723953  | 3.60037991  | 1.75266166  |
| 17 | 3.68570311  | 4.77827359  | 2.18677557  |
| 6  | -0.68409467 | -2.88388440 | -2.79246691 |
| 6  | -1.40421460 | -1.68904540 | -3.43649823 |
| 6  | -0.53563154 | -2.44820503 | -1.33941265 |
| 6  | -0.72997206 | -0.50584797 | -2.75727302 |
| 1  | 0.30216297  | -3.03161740 | -3.25498257 |
| 1  | -1.41274287 | -2.69652919 | -0.72728131 |
| 1  | -2.47730586 | -1.70762736 | -3.19836376 |
| 1  | -1.35685664 | 0.39005387  | -2.67424354 |
| 1  | -1.29058442 | -1.65460032 | -4.52708936 |
| 1  | 0.22893897  | -0.24572084 | -3.23164791 |
| 1  | 0.36772387  | -2.81368275 | -0.84045604 |
| 1  | -1.24902518 | -3.82025804 | -2.87764533 |
| 8  | -0.45772326 | -0.97216084 | -1.39214753 |
| 6  | -0.31386325 | 5.04563530  | 2.03263446  |
| 1  | -1.39084864 | 5.04832935  | 2.26810191  |
| 1  | 0.19226538  | 4.70762360  | 2.95430502  |
| 6  | 0.12249858  | 6.47542634  | 1.69640117  |
| 1  | -0.38295695 | 6.83548596  | 0.78715319  |
| 1  | 1.20586545  | 6.55138149  | 1.53018007  |
| 1  | -0.13228118 | 7.16482823  | 2.51353132  |

**6b + 2THF**

|    |             |             |             |
|----|-------------|-------------|-------------|
| 6  | 1.76320392  | 3.84258993  | 0.51737955  |
| 13 | 0.56597264  | 0.06042629  | -0.09373087 |
| 6  | -0.62493498 | 1.65532794  | 0.04123239  |
| 6  | -0.51315359 | 2.73085356  | 1.15153954  |
| 6  | 0.23521418  | 4.02038321  | 0.75201452  |
| 6  | 2.22427547  | -0.07883956 | -1.21382410 |
| 6  | 3.31701315  | -1.05086649 | -0.73048770 |
| 1  | -0.17762296 | 4.31953018  | -0.23219861 |
| 1  | 2.14166821  | 4.80638854  | 0.12913100  |
| 1  | -0.06817872 | 2.31086828  | 2.06624072  |
| 1  | 1.87483499  | 3.13269759  | -0.32228337 |
| 1  | -0.65872666 | 2.16461691  | -0.94202401 |
| 1  | 1.92906207  | -0.34669068 | -2.24627770 |
| 1  | 2.64901419  | 0.93587969  | -1.30485321 |
| 1  | 4.20456836  | -1.05362928 | -1.38598775 |

|    |             |             |             |
|----|-------------|-------------|-------------|
| 1  | 3.65176130  | -0.79980142 | 0.28643428  |
| 1  | 2.94852753  | -2.08624183 | -0.67921096 |
| 1  | -1.61667940 | 1.17396563  | 0.14092695  |
| 1  | -1.53149717 | 3.04603217  | 1.43582831  |
| 17 | 0.45473613  | -1.37199516 | 1.55881907  |
| 17 | 2.63290782  | 1.53145297  | 2.08881272  |
| 5  | 2.74268694  | 3.34588505  | 1.68498125  |
| 17 | 2.82493756  | 4.35692873  | 3.24493998  |
| 6  | -0.95184273 | -2.74928054 | -2.93010058 |
| 6  | -1.93231451 | -1.60848102 | -3.24186251 |
| 6  | -0.55495610 | -2.47096990 | -1.48267354 |
| 6  | -1.28428269 | -0.43283572 | -2.52606862 |
| 1  | -0.07499807 | -2.68952411 | -3.59052916 |
| 1  | -1.21928232 | -2.95093509 | -0.75288073 |
| 1  | -2.92300296 | -1.81757365 | -2.81339637 |
| 1  | -1.97903342 | 0.35573494  | -2.21530633 |
| 1  | -2.05017459 | -1.42242469 | -4.31683524 |
| 1  | -0.46693067 | 0.00892625  | -3.11907501 |
| 1  | 0.48362418  | -2.72648087 | -1.24287150 |
| 1  | -1.40067879 | -3.74386022 | -3.04307054 |
| 8  | -0.71969013 | -1.01368004 | -1.30594413 |
| 6  | 6.15720253  | 3.24248966  | -0.29687915 |
| 6  | 5.87106233  | 4.74828215  | -0.18368519 |
| 6  | 4.80483082  | 2.63563654  | 0.02346129  |
| 6  | 4.92516037  | 4.84441601  | 1.01118694  |
| 1  | 6.90371230  | 2.92610539  | 0.44514329  |
| 1  | 4.10320353  | 2.71153199  | -0.81930737 |
| 1  | 5.37739126  | 5.10978971  | -1.09665583 |
| 1  | 4.11773281  | 5.57372211  | 0.88983080  |
| 1  | 6.77717089  | 5.34554423  | -0.02393027 |
| 1  | 5.43573958  | 5.01940274  | 1.96374850  |
| 1  | 4.81930856  | 1.61356986  | 0.40969094  |
| 1  | 6.50853666  | 2.94765219  | -1.29351460 |
| 8  | 4.31162557  | 3.49144176  | 1.12373098  |
| 6  | -0.13003573 | 5.16379651  | 1.72244805  |
| 1  | -1.23091720 | 5.22362416  | 1.74839822  |
| 1  | 0.18880069  | 4.90725616  | 2.74299427  |
| 6  | 0.42391677  | 6.54074132  | 1.34447494  |
| 1  | 0.16700709  | 6.80391204  | 0.30589860  |
| 1  | 1.51730672  | 6.58379080  | 1.44648599  |
| 1  | 0.00852185  | 7.32127626  | 1.99799469  |

**6b'**

|    |             |             |             |
|----|-------------|-------------|-------------|
| 6  | 0.58412546  | 2.58829768  | -0.49080920 |
| 13 | 1.08010557  | 1.32958627  | -1.94625109 |
| 6  | -1.97233886 | 0.91312692  | 0.02484383  |
| 6  | -1.85627446 | 2.42962790  | 0.40210172  |
| 6  | -0.83160816 | 3.20607464  | -0.44556129 |
| 6  | 1.88307684  | -0.46884604 | -1.74305563 |
| 6  | 1.40887316  | -1.33927984 | -0.56587054 |

|    |             |             |             |
|----|-------------|-------------|-------------|
| 1  | -1.22842565 | 3.35186971  | -1.46551669 |
| 1  | 0.83543848  | 2.15679079  | 0.49442442  |
| 1  | -1.47874010 | 2.43314518  | 1.44110534  |
| 1  | 1.31426110  | 3.40472354  | -0.63889694 |
| 1  | -2.63798276 | 0.42688657  | 0.75292483  |
| 1  | -0.78009817 | 4.21775221  | -0.00908408 |
| 1  | 1.74992813  | -1.00628280 | -2.69669681 |
| 1  | 2.97292577  | -0.29961389 | -1.66686578 |
| 1  | 1.95583068  | -2.29353387 | -0.51036060 |
| 1  | 1.54731041  | -0.83306190 | 0.40160403  |
| 1  | 0.34067258  | -1.59263777 | -0.64928257 |
| 1  | -0.97454425 | 0.46341984  | 0.15233926  |
| 6  | -3.21621273 | 3.15089850  | 0.40516918  |
| 1  | -3.02472859 | 4.21326611  | 0.62821744  |
| 1  | -3.64826421 | 3.13194672  | -0.60993020 |
| 6  | -4.23751599 | 2.61078416  | 1.41107005  |
| 1  | -3.82444640 | 2.61022648  | 2.43116491  |
| 1  | -4.55256539 | 1.58480189  | 1.17502094  |
| 1  | -5.14268117 | 3.23345674  | 1.41944892  |
| 17 | 1.55530636  | 2.31471644  | -3.81295874 |
| 17 | -1.36379260 | 0.60106768  | -2.82137305 |
| 5  | -2.48393193 | 0.60034255  | -1.40868048 |
| 17 | -4.15196884 | 0.20523740  | -1.80308913 |

7a

|    |             |             |             |
|----|-------------|-------------|-------------|
| 6  | 2.12218478  | 1.85643323  | -4.09416615 |
| 13 | 3.65364154  | 1.28903086  | -0.34547256 |
| 6  | 1.63281154  | 3.67553644  | -2.33388464 |
| 6  | 0.37770320  | 3.37868486  | -3.20077809 |
| 6  | 0.93970728  | 2.76868684  | -4.51305934 |
| 6  | 5.15101966  | 0.03120120  | -0.30300991 |
| 6  | 6.53598964  | 0.65774097  | -0.04536627 |
| 1  | 0.17349487  | 2.23447234  | -5.09013523 |
| 1  | 2.87322423  | 1.67604587  | -4.87591087 |
| 1  | 1.75042433  | 0.85932485  | -3.78806881 |
| 1  | -0.19538008 | 2.58721463  | -2.68444855 |
| 1  | 1.31690304  | 3.58592631  | -5.15177337 |
| 1  | 4.92839085  | -0.71871437 | 0.47557913  |
| 1  | 5.15315040  | -0.53237827 | -1.25095095 |
| 1  | 7.32823948  | -0.10556496 | -0.00793703 |
| 1  | 6.81252090  | 1.37337209  | -0.83362188 |
| 1  | 6.56050092  | 1.20579063  | 0.90701435  |
| 1  | 2.07628019  | 4.64357265  | -2.64990112 |
| 1  | 1.44702125  | 3.76072045  | -1.25477989 |
| 6  | -0.54196294 | 4.58817889  | -3.39914007 |
| 1  | -0.80772843 | 4.99452681  | -2.40965524 |
| 1  | 0.02615394  | 5.38272855  | -3.91451696 |
| 6  | -1.82437318 | 4.28096066  | -4.17951560 |
| 1  | -2.40466955 | 3.48598532  | -3.68745263 |
| 1  | -1.60815972 | 3.95106895  | -5.20547125 |

|   |             |            |             |
|---|-------------|------------|-------------|
| 1 | -2.46812104 | 5.16898134 | -4.24724761 |
| 9 | 3.62979304  | 2.64574664 | 0.65548107  |
| 5 | 2.60918612  | 2.55799395 | -2.79300506 |
| 9 | 2.10233868  | 0.77709916 | -0.83117613 |
| 9 | 3.82882337  | 2.26172066 | -2.15574846 |

**7a + THF**

|    |             |             |             |
|----|-------------|-------------|-------------|
| 6  | -1.94677701 | 2.22242922  | 2.36900709  |
| 13 | 2.34590561  | -0.20339887 | -1.05457113 |
| 6  | -1.93049235 | 2.85993735  | -0.11556179 |
| 6  | -1.73816531 | 4.11213697  | 0.78375712  |
| 6  | -1.19335577 | 3.55075179  | 2.12014552  |
| 6  | 1.69765643  | 0.49685891  | -2.77818248 |
| 6  | 2.10100000  | -0.33038836 | -4.01414519 |
| 1  | -0.11762023 | 3.33981847  | 2.00499218  |
| 1  | -2.92513853 | 2.41754701  | 2.85167415  |
| 1  | -2.74108598 | 4.53644927  | 0.98132817  |
| 1  | -1.42596464 | 1.51056691  | 3.02423294  |
| 1  | -0.95886847 | 2.59249599  | -0.58133786 |
| 1  | -1.29746972 | 4.27344137  | 2.94248903  |
| 1  | 0.60104205  | 0.61433266  | -2.73642130 |
| 1  | 2.09177021  | 1.52321854  | -2.87213383 |
| 1  | 1.73925554  | 0.12133305  | -4.95108703 |
| 1  | 3.19363138  | -0.42326234 | -4.09450877 |
| 1  | 1.69799563  | -1.35426301 | -3.97161654 |
| 1  | -2.64203085 | 2.98154316  | -0.94363156 |
| 6  | -0.86201000 | 5.21863523  | 0.18713911  |
| 1  | -0.70123315 | 5.99571315  | 0.95372076  |
| 1  | 0.13275831  | 4.79539211  | -0.03469499 |
| 6  | -1.44138062 | 5.86624845  | -1.07429028 |
| 1  | -2.43240496 | 6.30236893  | -0.87640857 |
| 1  | -1.55497554 | 5.13458572  | -1.88699330 |
| 1  | -0.79044560 | 6.67161721  | -1.44238147 |
| 17 | 4.43178209  | -0.73331997 | -0.89131198 |
| 17 | 1.60051592  | 0.78371014  | 0.73823240  |
| 5  | -2.24771223 | 1.72485390  | 0.91432468  |
| 17 | -2.89032610 | 0.11161615  | 0.49990170  |
| 6  | 0.86997631  | -3.88555976 | 0.38493286  |
| 6  | -0.35298980 | -2.96573890 | 0.24666852  |
| 6  | 2.02863692  | -2.92610795 | 0.16971846  |
| 6  | 0.03768515  | -2.05926983 | -0.91081717 |
| 1  | 0.86281229  | -4.66549208 | -0.39002284 |
| 1  | 2.27831963  | -2.35780003 | 1.07646283  |
| 1  | -0.49785383 | -2.37342603 | 1.16025533  |
| 1  | -0.37074859 | -1.04481323 | -0.83552556 |
| 1  | -1.27988792 | -3.51269316 | 0.03549512  |
| 1  | -0.19647392 | -2.49162401 | -1.89276395 |
| 1  | 2.93449127  | -3.36887985 | -0.25562887 |
| 1  | 0.92830034  | -4.37155115 | 1.36670701  |
| 8  | 1.51930236  | -1.96207773 | -0.83898239 |

**7a + 2THF**

|    |             |             |             |
|----|-------------|-------------|-------------|
| 6  | 3.23957099  | 3.82932294  | -1.54504894 |
| 13 | 0.94971001  | 0.52472371  | -4.70522058 |
| 6  | 1.07330088  | 4.72328875  | -0.49686725 |
| 6  | 1.79976558  | 5.83166535  | -1.30608714 |
| 6  | 2.69124454  | 5.05892323  | -2.30923066 |
| 6  | -0.10056976 | -0.34662449 | -6.12565240 |
| 6  | 0.54031058  | -1.61145462 | -6.72846665 |
| 1  | 2.06916866  | 4.71299337  | -3.15110217 |
| 1  | 4.13592039  | 4.11023966  | -0.95942684 |
| 1  | 2.47114349  | 6.36706864  | -0.60959445 |
| 1  | 3.53624619  | 2.98972963  | -2.18898119 |
| 1  | 0.19396427  | 4.36736530  | -1.07347958 |
| 1  | -1.11102360 | -0.57155914 | -5.74274575 |
| 1  | -0.25789130 | 0.40614426  | -6.91691653 |
| 1  | -0.07803366 | -2.04956403 | -7.52769907 |
| 1  | 1.52767602  | -1.39295865 | -7.16033380 |
| 1  | 0.69254748  | -2.39517925 | -5.96987168 |
| 1  | 0.68917157  | 5.02959226  | 0.48569125  |
| 17 | 3.03160020  | 0.94907618  | -5.09640331 |
| 17 | -0.03723569 | 2.12864704  | -3.61633831 |
| 5  | 2.10394894  | 3.54576462  | -0.50608382 |
| 17 | 1.95804684  | 2.05640626  | 0.48500015  |
| 6  | 1.68586234  | -1.60480929 | -1.12204895 |
| 6  | 0.17496187  | -1.32791949 | -1.16042125 |
| 6  | 2.20532569  | -0.76081376 | -2.27391246 |
| 6  | -0.12400070 | -1.31932606 | -2.65191859 |
| 1  | 1.89397300  | -2.67095764 | -1.29245937 |
| 1  | 2.34847435  | 0.28921499  | -1.98865248 |
| 1  | -0.04410768 | -0.34500252 | -0.72166874 |
| 1  | -0.94215162 | -0.64739539 | -2.93866590 |
| 1  | -0.41454148 | -2.08876580 | -0.63403332 |
| 1  | -0.29623543 | -2.32475689 | -3.05979176 |
| 1  | 3.10481719  | -1.14317824 | -2.76626910 |
| 1  | 2.14609287  | -1.30436081 | -0.17282439 |
| 8  | 1.11667443  | -0.81219368 | -3.28707769 |
| 6  | 2.65561815  | 5.05252482  | 3.75119741  |
| 6  | 3.60981605  | 3.82836123  | 3.78435679  |
| 6  | 3.24568535  | 5.92690338  | 2.63509906  |
| 6  | 4.53376422  | 4.05271530  | 2.56639157  |
| 1  | 2.61211214  | 5.58402081  | 4.71095096  |
| 1  | 2.50179127  | 6.50560756  | 2.07252501  |
| 1  | 3.04739600  | 2.89170588  | 3.68785410  |
| 1  | 4.70840607  | 3.15011340  | 1.96744392  |
| 1  | 4.18891387  | 3.77993742  | 4.71582774  |
| 1  | 5.51021584  | 4.46443803  | 2.88500451  |
| 1  | 4.00673501  | 6.62313387  | 3.03915186  |
| 1  | 1.63642347  | 4.73976043  | 3.48954029  |
| 8  | 3.86473140  | 5.00689604  | 1.72452987  |



|   |             |            |             |
|---|-------------|------------|-------------|
| 1 | 3.48213967  | 5.69723373 | -2.72944334 |
| 6 | 0.88247165  | 6.86018290 | -1.97579463 |
| 1 | 1.49442291  | 7.51862470 | -2.61563088 |
| 1 | 0.19304690  | 6.32799855 | -2.65352692 |
| 6 | 0.07929594  | 7.71777427 | -0.99280747 |
| 1 | 0.74656055  | 8.26783622 | -0.31147016 |
| 1 | -0.59272495 | 7.10197723 | -0.37771825 |
| 1 | -0.53949136 | 8.45699844 | -1.52095296 |

**7a'**

|    |             |             |             |
|----|-------------|-------------|-------------|
| 6  | 0.28173044  | 3.94877694  | 0.37122397  |
| 13 | 0.64846194  | -0.55838101 | -2.18762371 |
| 6  | -1.38774109 | 2.06541944  | -0.15277189 |
| 6  | -1.94825861 | 3.02999183  | 0.93133938  |
| 6  | -1.17326793 | 4.35342327  | 0.71821163  |
| 6  | 2.33055876  | -1.02367878 | -3.09209351 |
| 6  | 2.67063938  | -0.21666862 | -4.35780184 |
| 1  | -1.61392483 | 4.89181381  | -0.13767206 |
| 1  | 0.84896411  | 3.73432962  | 1.29921296  |
| 1  | -1.65408479 | 2.62484346  | 1.91751325  |
| 1  | 0.86525212  | 4.70720637  | -0.16843114 |
| 1  | -1.90733322 | 2.24390494  | -1.11839496 |
| 1  | -1.24121727 | 5.01898806  | 1.59010687  |
| 1  | 3.14629245  | -0.95759727 | -2.35287301 |
| 1  | 2.24946816  | -2.09724716 | -3.33724672 |
| 1  | 3.59831512  | -0.57475832 | -4.82993675 |
| 1  | 1.87008574  | -0.28591489 | -5.10765226 |
| 1  | 2.81117287  | 0.85196763  | -4.13787890 |
| 1  | -1.51316597 | 0.99376534  | 0.05000272  |
| 6  | -3.47031401 | 3.20332136  | 0.92004917  |
| 1  | -3.74240332 | 3.98774604  | 1.64639468  |
| 1  | -3.77298779 | 3.58352734  | -0.07122160 |
| 6  | -4.24737872 | 1.92298999  | 1.24036718  |
| 1  | -3.97016144 | 1.52862585  | 2.22944226  |
| 1  | -4.05118554 | 1.13530748  | 0.49946982  |
| 1  | -5.33012526 | 2.10937421  | 1.24751149  |
| 17 | 0.14579840  | -1.52960212 | -0.34185872 |
| 17 | 1.38936486  | 1.75069968  | -1.26620450 |
| 5  | 0.06534958  | 2.57794428  | -0.34191028 |
| 17 | -1.04811323 | 0.06093940  | -3.34625990 |

**7b**

|    |             |             |             |
|----|-------------|-------------|-------------|
| 6  | 0.58201815  | 2.71895463  | 2.51289431  |
| 13 | 0.64337510  | 0.93388872  | -1.17942648 |
| 6  | -1.14554321 | 3.52057474  | 0.77504672  |
| 6  | -0.55411461 | 4.71538189  | 1.57315432  |
| 6  | -0.03529063 | 4.08948244  | 2.89575405  |
| 6  | 1.50263979  | -0.82334739 | -1.19135820 |
| 6  | 0.54474988  | -2.02390024 | -1.32534078 |
| 1  | 0.67298537  | 4.74396346  | 3.42066905  |

|   |             |             |             |
|---|-------------|-------------|-------------|
| 1 | 0.62238561  | 1.98062839  | 3.32597602  |
| 1 | 1.62456731  | 2.84947299  | 2.16325561  |
| 1 | 0.32443113  | 5.08052869  | 1.01074647  |
| 1 | -0.89174576 | 3.92836259  | 3.57296645  |
| 1 | 2.23095066  | -0.83059825 | -2.02055549 |
| 1 | 2.11043004  | -0.91599270 | -0.27583213 |
| 1 | 1.08963996  | -2.97997442 | -1.35350652 |
| 1 | -0.16100582 | -2.07838893 | -0.48323482 |
| 1 | -0.05763092 | -1.96091443 | -2.24279984 |
| 1 | -2.17713687 | 3.31455208  | 1.13122883  |
| 1 | -1.22133256 | 3.67437329  | -0.30983733 |
| 6 | -1.52807294 | 5.88408008  | 1.75669945  |
| 1 | -1.90357410 | 6.18825565  | 0.76606689  |
| 1 | -2.40724138 | 5.52535363  | 2.32070699  |
| 6 | -0.92339195 | 7.10202319  | 2.46293752  |
| 1 | -0.04146578 | 7.47514294  | 1.92087093  |
| 1 | -0.60953105 | 6.86441529  | 3.48922306  |
| 1 | -1.64978288 | 7.92447379  | 2.52224264  |
| 9 | -0.71759896 | 1.24080669  | -2.12661375 |
| 5 | -0.25533658 | 2.34197472  | 1.25625468  |
| 9 | 1.52644717  | 2.33816090  | -0.79141809 |
| 9 | -0.25727067 | 1.06121683  | 0.67415036  |

**7b + THF**

|    |             |             |             |
|----|-------------|-------------|-------------|
| 6  | -1.49280784 | 2.93829960  | 2.09859353  |
| 13 | 2.59733715  | -0.23453662 | -1.01639825 |
| 6  | -0.89750569 | 3.83587399  | -0.22898012 |
| 6  | -0.56142853 | 4.85652453  | 0.88516564  |
| 6  | -0.39456513 | 4.03263804  | 2.18561567  |
| 6  | 2.39709905  | 0.62143341  | -2.77953831 |
| 6  | 2.75269467  | -0.27195427 | -3.98380486 |
| 1  | 0.58432936  | 3.52280657  | 2.13265556  |
| 1  | -2.45717487 | 3.35085854  | 2.46404383  |
| 1  | -1.40720467 | 5.55475774  | 1.00960156  |
| 1  | -1.30426324 | 2.03797825  | 2.69913943  |
| 1  | 0.03385069  | 3.36967391  | -0.60734774 |
| 1  | 1.36996580  | 1.01210663  | -2.88189147 |
| 1  | 3.04373283  | 1.51562507  | -2.77491566 |
| 1  | 2.64997314  | 0.26321203  | -4.94082235 |
| 1  | 3.78818800  | -0.63607118 | -3.92042066 |
| 1  | 2.10645802  | -1.16180556 | -4.03942545 |
| 1  | -1.40841372 | 4.25360209  | -1.10742900 |
| 1  | 0.32918530  | 5.46337883  | 0.66687603  |
| 17 | 4.42783777  | -1.30077403 | -0.60309860 |
| 17 | 1.89657385  | 0.90265471  | 0.70451582  |
| 5  | -1.65731947 | 2.71540655  | 0.55739304  |
| 17 | -2.59974920 | 1.39590219  | -0.18930803 |
| 6  | 0.01844339  | -3.39529933 | 0.06477374  |
| 6  | -0.89112605 | -2.18846443 | -0.21243801 |
| 6  | 1.40342473  | -2.77036291 | 0.05514479  |

|   |             |             |             |
|---|-------------|-------------|-------------|
| 6 | -0.11199576 | -1.41386004 | -1.26505170 |
| 1 | -0.07370713 | -4.14709193 | -0.73221417 |
| 1 | 1.65049045  | -2.28151314 | 1.00789053  |
| 1 | -1.01405108 | -1.57948551 | 0.69342957  |
| 1 | -0.24754950 | -0.32786172 | -1.20421995 |
| 1 | -1.88555337 | -2.47432036 | -0.57608885 |
| 1 | -0.30529258 | -1.76437792 | -2.28757804 |
| 1 | 2.21852888  | -3.43562281 | -0.24582809 |
| 1 | -0.19714539 | -3.87854491 | 1.02574233  |
| 8 | 1.31714138  | -1.71315539 | -0.98399891 |
| 6 | -0.42072752 | 4.88744810  | 3.45675378  |
| 1 | 0.32011529  | 5.69852335  | 3.35417033  |
| 1 | -1.40641414 | 5.37985834  | 3.53210888  |
| 6 | -0.13561036 | 4.10485229  | 4.74247215  |
| 1 | 0.84702827  | 3.61233215  | 4.69414457  |
| 1 | -0.89126651 | 3.32514245  | 4.91540212  |
| 1 | -0.13525452 | 4.76703021  | 5.61971250  |

**7b + 2THF**

|    |             |             |             |
|----|-------------|-------------|-------------|
| 6  | 4.85666975  | 2.26141842  | 0.15295046  |
| 13 | 1.61167786  | -0.64587288 | -2.63979876 |
| 6  | 3.02327235  | 0.76649223  | -0.83826846 |
| 6  | 3.23135106  | 2.05594939  | -1.66815368 |
| 6  | 4.67060667  | 2.53513591  | -1.36191628 |
| 6  | 0.18247256  | 0.65009966  | -3.01396044 |
| 6  | -1.00161396 | 0.01981483  | -3.77673866 |
| 1  | 5.36729746  | 1.87512212  | -1.91212206 |
| 1  | 4.38339762  | 3.08248002  | 0.73203543  |
| 1  | 2.51584871  | 2.81607938  | -1.31667103 |
| 1  | 5.89767471  | 2.19556689  | 0.49641822  |
| 1  | 3.49219880  | -0.12246503 | -1.32203879 |
| 1  | -0.16153678 | 1.07966951  | -2.06002375 |
| 1  | 0.60906523  | 1.48173039  | -3.59594696 |
| 1  | -1.79949782 | 0.75620603  | -3.95919684 |
| 1  | -0.69274642 | -0.37242127 | -4.75688371 |
| 1  | -1.44854725 | -0.81632024 | -3.21923043 |
| 1  | 1.98800890  | 0.53912378  | -0.52054350 |
| 1  | 3.07683009  | 1.92187564  | -2.74866469 |
| 17 | 1.20502719  | -2.38723738 | -1.46242568 |
| 17 | 3.20838114  | -0.91707742 | -4.04442566 |
| 5  | 3.96814764  | 1.00577432  | 0.41629411  |
| 17 | 3.99783693  | -0.00994248 | 1.86083789  |
| 6  | -2.19211729 | -0.54548048 | 1.74847468  |
| 6  | -1.09690331 | -1.56937358 | 2.08229141  |
| 6  | -1.52593827 | 0.24141713  | 0.62262166  |
| 6  | 0.18333704  | -0.74475255 | 1.91492617  |
| 1  | -2.38796251 | 0.10936388  | 2.61068196  |
| 1  | -1.64151932 | -0.28446780 | -0.34279820 |
| 1  | -1.11705272 | -2.39523043 | 1.35694189  |
| 1  | 1.02190906  | -1.33483795 | 1.51980561  |

|   |             |             |             |
|---|-------------|-------------|-------------|
| 1 | -1.19058290 | -1.99304087 | 3.09029021  |
| 1 | 0.49594731  | -0.27608528 | 2.86297062  |
| 1 | -1.90359921 | 1.26837533  | 0.51203262  |
| 1 | -3.13844232 | -1.00794445 | 1.43889042  |
| 8 | -0.12581034 | 0.31805504  | 0.97003178  |
| 6 | 0.26686599  | 5.88606913  | 1.17033794  |
| 6 | -0.35846611 | 4.53497017  | 1.61407705  |
| 6 | 1.78235851  | 5.59470632  | 1.15704912  |
| 6 | 0.86584298  | 3.65450820  | 1.91204630  |
| 1 | 0.02450054  | 6.70505618  | 1.86009657  |
| 1 | 2.31536681  | 6.03272665  | 0.30326537  |
| 1 | -0.95262510 | 4.09868965  | 0.80044785  |
| 1 | 0.72508739  | 2.59265168  | 1.67281217  |
| 1 | -1.01125729 | 4.63921282  | 2.49069924  |
| 1 | 1.16993689  | 3.75300351  | 2.97241018  |
| 1 | 2.25730006  | 5.94932879  | 2.09198840  |
| 1 | -0.08864926 | 6.17298364  | 0.17264102  |
| 8 | 1.90979246  | 4.16709247  | 1.06405205  |
| 6 | 4.92948439  | 3.97828690  | -1.80665618 |
| 1 | 4.64721805  | 4.07902485  | -2.86830890 |
| 1 | 4.25451860  | 4.64307888  | -1.24100310 |
| 6 | 6.37995256  | 4.43578468  | -1.62534853 |
| 1 | 7.07130252  | 3.78862725  | -2.18579023 |
| 1 | 6.68162696  | 4.41120879  | -0.56849282 |
| 1 | 6.52006096  | 5.46414876  | -1.98670823 |

**7b'**

|    |             |             |             |
|----|-------------|-------------|-------------|
| 6  | 0.81117661  | 2.47142919  | 1.20679749  |
| 13 | 1.56106756  | 0.31228504  | -1.96842210 |
| 6  | -1.68275698 | 2.49362743  | 0.58652842  |
| 6  | -1.33162017 | 3.67454642  | 1.53610868  |
| 6  | 0.19248659  | 3.88355488  | 1.35159417  |
| 6  | 1.06368549  | -1.19090881 | -3.13148138 |
| 6  | 1.94507437  | -1.29893049 | -4.39307368 |
| 1  | 0.36866917  | 4.44843177  | 0.42152906  |
| 1  | 0.95173406  | 2.01019956  | 2.20659473  |
| 1  | -1.49926960 | 3.32527029  | 2.57227002  |
| 1  | 1.79282727  | 2.43016019  | 0.71780093  |
| 1  | -1.82819416 | 2.87833605  | -0.44587118 |
| 1  | 0.63071456  | 4.46550677  | 2.17445523  |
| 1  | 1.12996154  | -2.12045053 | -2.54266701 |
| 1  | 0.00538782  | -1.07362598 | -3.41558255 |
| 1  | 1.64270356  | -2.14874314 | -5.02408684 |
| 1  | 1.87969253  | -0.39323671 | -5.01359600 |
| 1  | 3.00475250  | -1.44377235 | -4.13703502 |
| 1  | -2.59877117 | 1.93980343  | 0.83236563  |
| 6  | -2.15427578 | 4.94891047  | 1.32146222  |
| 1  | -1.74086869 | 5.74691111  | 1.96085904  |
| 1  | -2.01357675 | 5.28639737  | 0.28012215  |
| 6  | -3.64853927 | 4.78770431  | 1.61628688  |

|    |             |             |             |
|----|-------------|-------------|-------------|
| 1  | -3.81416394 | 4.46518081  | 2.65533592  |
| 1  | -4.11291255 | 4.04110414  | 0.95616426  |
| 1  | -4.18564189 | 5.73528354  | 1.47210673  |
| 17 | 3.36418621  | 0.23260821  | -0.81570413 |
| 17 | 0.99892789  | 2.32037868  | -2.52285045 |
| 5  | -0.35362923 | 1.68789304  | 0.53993612  |
| 17 | -0.22813441 | -0.00392030 | -0.14979589 |

## 8

|    |             |             |              |
|----|-------------|-------------|--------------|
| 13 | -0.66519635 | -2.33822170 | -9.14458315  |
| 6  | 0.66602313  | -1.72134803 | -10.43497164 |
| 6  | 2.12187281  | -2.13505826 | -10.15163745 |
| 1  | 0.34236295  | -2.06400984 | -11.43156465 |
| 1  | 0.57857818  | -0.62160684 | -10.47547277 |
| 1  | 2.81054407  | -1.70366696 | -10.89319368 |
| 1  | 2.45478821  | -1.79973101 | -9.15972080  |
| 1  | 2.24822775  | -3.22616067 | -10.17885183 |
| 9  | -2.30781903 | -2.21313285 | -9.44454561  |
| 9  | -0.22798766 | -2.99879588 | -7.66884407  |

## 8'

|    |             |             |             |
|----|-------------|-------------|-------------|
| 17 | -2.27670519 | 1.98949658  | -2.92903211 |
| 13 | -3.77475515 | 0.72077397  | -2.13617554 |
| 6  | -5.42307206 | 1.44656492  | -1.36518875 |
| 1  | -5.12584844 | 2.27745542  | -0.70350203 |
| 1  | -5.96971631 | 1.92720813  | -2.19517942 |
| 6  | -6.32778260 | 0.44613688  | -0.62458136 |
| 1  | -5.82416585 | 0.01513918  | 0.25171408  |
| 1  | -6.62285575 | -0.39267614 | -1.26982594 |
| 1  | -7.24970028 | 0.93072501  | -0.27007669 |
| 17 | -3.40023488 | -1.36090449 | -2.23953026 |

## 9

|   |             |            |             |
|---|-------------|------------|-------------|
| 6 | -2.02551104 | 1.48007183 | -3.00372665 |
| 6 | -0.68825031 | 3.59179897 | -2.38879379 |
| 6 | -2.08740631 | 3.59850077 | -1.71974731 |
| 6 | -2.94879986 | 2.65443407 | -2.59904090 |
| 1 | -3.86581406 | 2.32811393 | -2.08957035 |
| 1 | -2.32842499 | 0.94881653 | -3.91697260 |
| 1 | -2.00606100 | 0.71738536 | -2.20083771 |
| 1 | -1.98412682 | 3.12116111 | -0.72660615 |
| 1 | -3.26303043 | 3.20231218 | -3.50341841 |
| 1 | -0.67433864 | 4.32795934 | -3.21868422 |
| 1 | 0.13793025  | 3.87494463 | -1.72077081 |
| 6 | -2.67783526 | 4.99801815 | -1.51409405 |
| 1 | -1.95149577 | 5.60899139 | -0.95296953 |
| 1 | -2.78522542 | 5.48142146 | -2.50121842 |
| 6 | -4.02407821 | 5.01697051 | -0.78211647 |
| 1 | -3.94453438 | 4.53498353 | 0.20415183  |
| 1 | -4.80323467 | 4.48880929 | -1.34960934 |

|   |             |            |             |
|---|-------------|------------|-------------|
| 1 | -4.37286875 | 6.04680367 | -0.62159031 |
| 5 | -0.60489985 | 2.15935556 | -3.03480976 |
| 9 | 0.50895990  | 1.59825387 | -3.53631223 |

**9'**

|    |             |            |             |
|----|-------------|------------|-------------|
| 6  | -2.01231022 | 1.33257681 | -3.09983950 |
| 6  | -0.53535359 | 3.33611765 | -2.50846598 |
| 6  | -1.92222043 | 3.44603905 | -1.82185383 |
| 6  | -2.85360297 | 2.56647617 | -2.69328986 |
| 1  | -3.78759452 | 2.30109084 | -2.17903771 |
| 1  | -2.36185967 | 0.80578004 | -3.99844527 |
| 1  | -2.02683307 | 0.57954316 | -2.28673290 |
| 1  | -1.84231306 | 2.96276453 | -0.82957228 |
| 1  | -3.13183422 | 3.13404178 | -3.59847982 |
| 1  | -0.48769811 | 4.05723092 | -3.35155382 |
| 1  | 0.32006728  | 3.57779760 | -1.86211430 |
| 6  | -2.40401636 | 4.88587347 | -1.61218328 |
| 1  | -1.62594512 | 5.44259113 | -1.06415924 |
| 1  | -2.49092031 | 5.37381129 | -2.59902026 |
| 6  | -3.73333777 | 5.00490116 | -0.85908204 |
| 1  | -3.67279965 | 4.52230699 | 0.12818223  |
| 1  | -4.55745770 | 4.53211380 | -1.41171990 |
| 1  | -4.00425951 | 6.05782895 | -0.69831371 |
| 5  | -0.55216286 | 1.90595656 | -3.15055841 |
| 17 | 0.85351916  | 1.06643124 | -3.83074097 |

**10a**

|    |             |             |             |
|----|-------------|-------------|-------------|
| 6  | 0.15110514  | 2.75486546  | 1.25959060  |
| 13 | -0.33296766 | 0.20030120  | -0.11096245 |
| 6  | -2.13207365 | 1.02088828  | -0.17227671 |
| 6  | -2.21378648 | 2.51168988  | 0.24520162  |
| 6  | -1.37392038 | 2.76086056  | 1.51594095  |
| 6  | 0.84729427  | -0.29449178 | -1.60853487 |
| 6  | 2.28432458  | -0.70610442 | -1.23527930 |
| 1  | -1.64631467 | 3.72504381  | 1.96680278  |
| 1  | 0.52181026  | 3.79190031  | 1.16231059  |
| 1  | 0.40501791  | 2.35099938  | 0.25149442  |
| 1  | -1.78151564 | 3.12216509  | -0.57012977 |
| 1  | -1.63664964 | 1.99195029  | 2.25999905  |
| 1  | 0.34408823  | -1.11778953 | -2.14841033 |
| 1  | 0.85662704  | 0.54175832  | -2.32951306 |
| 1  | 2.86437691  | -1.00846882 | -2.12051308 |
| 1  | 2.82888885  | 0.11627901  | -0.75036051 |
| 1  | 2.29174534  | -1.54842090 | -0.52977478 |
| 1  | -2.75659277 | 0.43396924  | 0.52814069  |
| 1  | -2.56197729 | 0.89190937  | -1.18023637 |
| 6  | -3.67990254 | 2.95535912  | 0.42267323  |
| 1  | -4.25679118 | 2.58920462  | -0.44211562 |
| 1  | -4.09878056 | 2.44579736  | 1.30758264  |
| 6  | -3.88835439 | 4.46872737  | 0.54466506  |

|   |             |             |             |
|---|-------------|-------------|-------------|
| 1 | -3.48858806 | 4.99438633  | -0.33561336 |
| 1 | -3.39897295 | 4.88652972  | 1.43575633  |
| 1 | -4.95780420 | 4.71060723  | 0.61787142  |
| 9 | 2.34194899  | 1.75892010  | 2.06235712  |
| 5 | 1.06143691  | 2.04461193  | 2.33367390  |
| 9 | 0.19856557  | -0.23695947 | 1.45059928  |
| 9 | 0.64857836  | 1.84743761  | 3.58795751  |
| 9 | -5.20336752 | -0.13412011 | -2.12096860 |
| 9 | -5.75638445 | -0.40687064 | 0.09369228  |
| 5 | -5.04809551 | -0.77022614 | -0.96649824 |
| 9 | -4.19610087 | -1.78510474 | -0.88039101 |

**10a'**

|    |             |             |             |
|----|-------------|-------------|-------------|
| 6  | 1.09373789  | 3.71309224  | 1.30049958  |
| 13 | -0.35193257 | 0.16012728  | -1.21138226 |
| 6  | -1.54567112 | 1.64935632  | -0.67466302 |
| 6  | -1.04439486 | 2.47306966  | 0.53418567  |
| 6  | 0.17569590  | 3.33160503  | 0.12938182  |
| 6  | 0.92221206  | 0.12533093  | -2.72038711 |
| 6  | 1.57198107  | -1.22538104 | -3.06824486 |
| 1  | 0.77323517  | 2.79674605  | -0.62717564 |
| 1  | 0.52638523  | 4.18165813  | 2.12239201  |
| 1  | -0.72089739 | 1.77089767  | 1.32610819  |
| 1  | 1.79945640  | 4.50857864  | 0.98693636  |
| 1  | -1.70728873 | 2.32657781  | -1.53257066 |
| 1  | -0.18918714 | 4.24348720  | -0.37209860 |
| 1  | 0.39351716  | 0.53903417  | -3.59742971 |
| 1  | 1.70358471  | 0.87217524  | -2.48971558 |
| 1  | 2.26688969  | -1.13566680 | -3.91760181 |
| 1  | 2.13534962  | -1.63216666 | -2.21714302 |
| 1  | 0.81901637  | -1.98013254 | -3.33723006 |
| 1  | -2.52549991 | 1.19643460  | -0.44738018 |
| 6  | -2.15005973 | 3.36239744  | 1.14406087  |
| 1  | -1.69382342 | 4.07015568  | 1.85723570  |
| 1  | -2.58288307 | 3.97756753  | 0.33625182  |
| 6  | -3.25972057 | 2.59417729  | 1.86665313  |
| 1  | -2.85078953 | 1.99328788  | 2.69257878  |
| 1  | -3.79237942 | 1.90984108  | 1.19130419  |
| 1  | -4.00379408 | 3.28310124  | 2.29033760  |
| 17 | -0.42479785 | -1.57146980 | 0.07054816  |
| 17 | 2.31797152  | 1.06163163  | 1.05441954  |
| 5  | 2.00335404  | 2.59125824  | 1.89942981  |
| 17 | 2.83201291  | 2.83110021  | 3.44326345  |
| 17 | -4.69481889 | -1.23034371 | -5.06948115 |
| 17 | -2.88802972 | 1.16041728  | -4.55565842 |
| 5  | -3.40487089 | -0.46709994 | -4.16939612 |
| 17 | -2.61903128 | -1.35604618 | -2.86439418 |

**10b**

|   |            |            |            |
|---|------------|------------|------------|
| 6 | 0.23752996 | 1.26414736 | 1.60638338 |
|---|------------|------------|------------|

|    |             |             |             |
|----|-------------|-------------|-------------|
| 13 | 0.19486457  | -0.00865834 | 0.10127599  |
| 6  | -1.71790828 | 2.27604216  | -0.63000290 |
| 6  | -1.51005120 | 2.96658868  | 0.73746227  |
| 6  | -1.10099299 | 1.99154586  | 1.85925892  |
| 6  | 1.64723485  | -0.56568468 | -1.10648827 |
| 6  | 2.99829184  | 0.14762250  | -0.90931317 |
| 1  | -1.03720133 | 2.56122348  | 2.79941351  |
| 1  | 0.51867906  | 0.68518023  | 2.50540165  |
| 1  | 1.05107705  | 1.99303072  | 1.43941899  |
| 1  | -0.67484504 | 3.68115859  | 0.60839296  |
| 1  | -1.90635294 | 1.25307862  | 2.00285685  |
| 1  | 1.76544420  | -1.65665600 | -0.98271416 |
| 1  | 1.29056561  | -0.44260801 | -2.14332530 |
| 1  | 3.76406565  | -0.22749102 | -1.60515532 |
| 1  | 2.91609061  | 1.23191637  | -1.07430128 |
| 1  | 3.39066286  | 0.00814538  | 0.10867779  |
| 1  | -1.96873567 | 3.04950911  | -1.38125169 |
| 1  | -0.75859877 | 1.89100950  | -1.04171330 |
| 6  | -2.75302977 | 3.80075264  | 1.11738425  |
| 1  | -3.08001654 | 4.36156508  | 0.22570889  |
| 1  | -3.58279263 | 3.12415752  | 1.37562996  |
| 6  | -2.52345650 | 4.79748903  | 2.25879283  |
| 1  | -1.69226538 | 5.48060108  | 2.02766200  |
| 1  | -2.29112115 | 4.29617615  | 3.20803250  |
| 1  | -3.42135981 | 5.40898648  | 2.42440253  |
| 9  | -1.30857980 | -0.78229491 | -0.10317732 |
| 5  | -2.83263934 | 1.16584418  | -0.80688691 |
| 9  | -3.00479629 | 0.60004589  | -2.00896639 |
| 9  | -3.74451654 | 0.87709867  | 0.12736182  |
| 9  | 1.98390500  | 1.62226644  | 4.80386353  |
| 9  | 1.45517097  | 3.70469609  | 3.98646010  |
| 5  | 2.23228828  | 2.62922284  | 3.97612285  |
| 9  | 3.27551286  | 2.57292127  | 3.15693317  |

**10b'**

|    |             |             |             |
|----|-------------|-------------|-------------|
| 6  | 0.37398788  | 3.10035079  | 1.42424364  |
| 13 | 1.13905845  | 1.26688905  | 1.40909734  |
| 6  | -2.44518726 | 2.33253307  | -1.08249628 |
| 6  | -1.91877164 | 2.68349750  | 0.31925473  |
| 6  | -0.55767425 | 3.41473788  | 0.23612471  |
| 6  | 0.61496061  | -0.32612769 | 2.45717835  |
| 6  | -0.82240601 | -0.36823653 | 3.00462031  |
| 1  | -0.04773913 | 3.15231808  | -0.70573062 |
| 1  | -0.15617489 | 3.27348604  | 2.37678369  |
| 1  | -1.75857467 | 1.73388627  | 0.86162207  |
| 1  | 1.23287632  | 3.79225287  | 1.41952507  |
| 1  | -2.51553344 | 3.24054055  | -1.70889761 |
| 1  | -0.75245324 | 4.50037001  | 0.16946462  |
| 1  | 0.82299895  | -1.21737807 | 1.84258240  |
| 1  | 1.33852938  | -0.38705142 | 3.29020928  |



|    |             |             |             |
|----|-------------|-------------|-------------|
| 1  | -0.99397624 | -1.24918167 | 3.64241683  |
| 1  | -1.05928051 | 0.52054441  | 3.60860712  |
| 1  | -1.56353814 | -0.41162111 | 2.19255490  |
| 1  | -3.49044923 | 1.96715231  | -1.03338762 |
| 6  | -2.93379982 | 3.50367578  | 1.13940920  |
| 1  | -2.42466321 | 3.88320379  | 2.04030235  |
| 1  | -3.22206362 | 4.39436093  | 0.55512472  |
| 6  | -4.18594313 | 2.73308830  | 1.56728707  |
| 1  | -3.92058731 | 1.85051887  | 2.16842968  |
| 1  | -4.77404440 | 2.38560420  | 0.70528997  |
| 1  | -4.84807133 | 3.36409617  | 2.17629538  |
| 17 | 2.94780903  | 1.05880121  | 0.25220529  |
| 17 | -2.04511303 | 0.93220729  | -3.58778593 |
| 5  | -1.67888033 | 1.23756158  | -1.88770323 |
| 17 | -0.44163943 | 0.18031402  | -1.15406010 |
| 17 | 0.94783075  | 2.44405611  | 5.66219172  |
| 17 | 3.61821722  | 3.55349912  | 6.59690574  |
| 5  | 2.63956908  | 2.79515551  | 5.35985614  |
| 17 | 3.35632200  | 2.38216146  | 3.80850571  |

### 11a

|    |             |             |              |
|----|-------------|-------------|--------------|
| 6  | -1.32321432 | -5.81981621 | -5.91953641  |
| 13 | -0.56615728 | -2.17875818 | -8.89718240  |
| 6  | -2.14581241 | -2.47275801 | -5.65357070  |
| 6  | -1.12118314 | -3.40661247 | -4.94647229  |
| 6  | -1.67471247 | -4.84332208 | -4.77983580  |
| 6  | 0.92211070  | -1.45267168 | -9.93237013  |
| 6  | 2.32626222  | -1.89981297 | -9.47939573  |
| 1  | -1.27355787 | -5.26217630 | -3.84450914  |
| 1  | -1.53342167 | -6.85231154 | -5.57852849  |
| 1  | -0.23732604 | -5.81489976 | -6.10885549  |
| 1  | -0.21877387 | -3.46941223 | -5.57827612  |
| 1  | -2.76711932 | -4.79583768 | -4.64312039  |
| 1  | 0.75723560  | -1.74031993 | -10.98491825 |
| 1  | 0.84238986  | -0.35307889 | -9.92050754  |
| 1  | 3.11314557  | -1.47585573 | -10.12137702 |
| 1  | 2.54338680  | -1.58188614 | -8.44906235  |
| 1  | 2.43191678  | -2.99340429 | -9.50840694  |
| 1  | -2.57518839 | -2.98896483 | -6.52920196  |
| 1  | -2.98539694 | -2.25594686 | -4.97535945  |
| 6  | -0.70536545 | -2.78873082 | -3.59458596  |
| 1  | -0.52636520 | -1.70684959 | -3.72918777  |
| 1  | -1.55330536 | -2.86371179 | -2.89210549  |
| 6  | 0.54728903  | -3.41192889 | -2.97220084  |
| 1  | 1.41432064  | -3.30340437 | -3.64038533  |
| 1  | 0.41662484  | -4.48400049 | -2.76813818  |
| 1  | 0.79551844  | -2.92551276 | -2.01885667  |
| 9  | -1.66855122 | -6.47179418 | -8.33607038  |
| 5  | -2.05601830 | -5.71431225 | -7.30260450  |
| 9  | -0.47376230 | -3.74318269 | -8.24163164  |

9 -3.18205216 -5.00381988 -7.48718721  
9 -2.15796618 -1.63850723 -9.07673539  
9 -1.88910536 0.08464378 -5.86578906  
5 -1.53023416 -1.14992169 -6.17067413  
9 -0.43338995 -1.18959113 -7.04403267

**11a'**

6 -0.26156827 4.98036355 0.73073767  
13 0.31006132 -1.22330289 -1.03645137  
6 -2.15364856 2.08288040 -1.17014002  
6 -1.47971561 2.77931784 0.04763415  
6 -1.04224488 4.20543654 -0.34759474  
6 1.66846038 -2.09314675 -2.15784824  
6 1.21339448 -2.53897753 -3.55833151  
1 -0.41798671 4.15425189 -1.25542456  
1 -0.85830601 5.11782044 1.64351058  
1 -0.58172466 2.19636112 0.31513291  
1 -0.09110136 6.01048943 0.35599584  
1 -3.09256100 2.60335723 -1.41713087  
1 -1.93858149 4.78440447 -0.62788606  
1 2.53960441 -1.42056094 -2.22064744  
1 2.01768266 -2.96241142 -1.57286464  
1 2.02297218 -3.05051722 -4.10067997  
1 0.36202595 -3.23165741 -3.50463926  
1 0.89575531 -1.68653658 -4.17592661  
1 -2.42504781 1.05179570 -0.87741160  
6 -2.42567918 2.77974153 1.26384187  
1 -1.92233829 3.29510726 2.09633113  
1 -3.31514758 3.38733619 1.01988555  
6 -2.86012202 1.39412319 1.75124191  
1 -1.99171811 0.75344242 1.96092786  
1 -3.49001765 0.87327257 1.01685368  
1 -3.44617602 1.48064099 2.67667479  
17 0.83897148 -0.47906923 0.89706264  
17 2.24597957 3.72103184 -0.07869259  
5 1.17281600 4.47760858 1.10713041  
17 1.82543116 4.73787089 2.73049482  
17 -1.68736129 2.65794344 -4.00515502  
17 0.29663512 1.05589193 -2.43378253  
5 -1.28167800 1.96220413 -2.44542318  
17 -1.76253596 -1.73171377 -1.25379123

**11b**

6 -0.35091687 4.32571688 -0.02900762  
13 0.65125399 0.41847506 -0.52249916  
6 -2.73645434 2.28311487 0.22927555  
6 -2.41315297 3.40014686 1.25777093  
6 -0.92683343 3.80311968 1.29644850  
6 1.43231134 -1.34631886 -0.22784075  
6 2.45819729 -1.43239288 0.91982523

|   |             |             |             |
|---|-------------|-------------|-------------|
| 1 | -0.80293082 | 4.58685575  | 2.05812801  |
| 1 | -0.85386747 | 5.26599407  | -0.32260834 |
| 1 | -0.53787149 | 3.63181041  | -0.86428090 |
| 1 | -2.98593633 | 4.28855172  | 0.93391420  |
| 1 | -0.32084179 | 2.95470336  | 1.64999466  |
| 1 | 0.60810848  | -2.06053003 | -0.06533793 |
| 1 | 1.89988439  | -1.65908613 | -1.17719037 |
| 1 | 2.87982282  | -2.44478848 | 1.01004351  |
| 1 | 3.29639458  | -0.73823845 | 0.76718430  |
| 1 | 2.00659317  | -1.18082302 | 1.89044975  |
| 1 | -3.82834818 | 2.17738054  | 0.13178557  |
| 1 | -2.38674848 | 2.57933929  | -0.77700561 |
| 6 | -2.94309416 | 2.99523580  | 2.64900527  |
| 1 | -3.97167592 | 2.61521760  | 2.53248791  |
| 1 | -2.34368269 | 2.14768110  | 3.02909278  |
| 6 | -2.95002890 | 4.11756924  | 3.69161619  |
| 1 | -3.51737070 | 4.98774634  | 3.32850075  |
| 1 | -1.93646757 | 4.45724806  | 3.94242940  |
| 1 | -3.42237910 | 3.77872200  | 4.62389935  |
| 9 | -0.58257521 | 0.67361549  | -1.66811443 |
| 5 | -2.15618361 | 0.85901039  | 0.45148905  |
| 9 | -2.82205175 | -0.27023640 | 0.27030126  |
| 9 | -0.85288880 | 0.63782170  | 0.92993003  |
| 9 | 1.51005579  | 1.82632780  | -0.14902189 |
| 9 | 1.90259127  | 4.65613167  | 1.12313207  |
| 5 | 1.19622529  | 4.59028531  | -0.01302659 |
| 9 | 1.86729996  | 4.84967912  | -1.14270500 |

**11b'**

|    |             |             |             |
|----|-------------|-------------|-------------|
| 6  | -0.69546612 | 2.79960966  | 1.69665494  |
| 13 | -0.05160112 | 0.00575361  | 4.27724571  |
| 6  | -1.96410904 | 3.79318663  | -1.86453510 |
| 6  | -1.76557441 | 2.85620327  | -0.65513171 |
| 6  | -1.20001334 | 3.66394720  | 0.53167833  |
| 6  | 0.73881546  | -0.42339170 | 6.02299638  |
| 6  | 2.27605603  | -0.42542575 | 6.09381860  |
| 1  | -0.36965392 | 4.29237228  | 0.17286961  |
| 1  | -1.50246706 | 2.16989863  | 2.11696156  |
| 1  | -1.01620925 | 2.09297872  | -0.92922393 |
| 1  | 0.03663230  | 2.04940236  | 1.33744229  |
| 1  | -2.64789970 | 4.61759160  | -1.59976153 |
| 1  | -1.97342280 | 4.36295074  | 0.89197404  |
| 1  | 0.30815866  | 0.26003863  | 6.77337493  |
| 1  | 0.34491880  | -1.42170290 | 6.28409561  |
| 1  | 2.63369940  | -0.72211140 | 7.09139660  |
| 1  | 2.71373080  | -1.12119423 | 5.36447290  |
| 1  | 2.69851464  | 0.56775535  | 5.88130621  |
| 1  | -2.49301822 | 3.24862693  | -2.67274896 |
| 6  | -3.07113227 | 2.12602970  | -0.28402104 |
| 1  | -2.92677820 | 1.58765289  | 0.66536693  |

|    |             |             |             |
|----|-------------|-------------|-------------|
| 1  | -3.85739486 | 2.87745524  | -0.09517007 |
| 6  | -3.55659834 | 1.11796394  | -1.33037925 |
| 1  | -2.78770881 | 0.35765781  | -1.53171188 |
| 1  | -3.81369022 | 1.59804947  | -2.28562394 |
| 1  | -4.45701068 | 0.59555413  | -0.97917360 |
| 17 | -2.18103040 | 0.18000514  | 4.08499779  |
| 17 | -0.80659446 | 5.88762096  | -3.49698337 |
| 5  | -0.70136651 | 4.37898254  | -2.57511153 |
| 17 | 0.86146937  | 3.54521108  | -2.58241630 |
| 17 | 0.56106596  | 2.57915579  | 4.32676560  |
| 17 | 0.22153434  | 5.25434068  | 3.03004436  |
| 5  | -0.03602990 | 3.52702066  | 2.89124937  |
| 17 | 0.95285731  | -0.55541197 | 2.46992089  |

## 12

|   |             |             |             |
|---|-------------|-------------|-------------|
| 6 | -0.40240343 | 4.08985067  | 0.04779360  |
| 6 | -3.03132240 | 2.38325499  | 0.23253461  |
| 6 | -2.58307864 | 3.42666038  | 1.27982322  |
| 6 | -1.05160697 | 3.58796136  | 1.35393601  |
| 1 | -0.81846861 | 4.30428771  | 2.15470142  |
| 1 | 0.61577535  | 4.46180010  | 0.27662088  |
| 1 | -0.93390068 | 4.97132733  | -0.34672738 |
| 1 | -2.99336550 | 4.40127988  | 0.95368156  |
| 1 | -0.59593756 | 2.63123859  | 1.65454482  |
| 1 | -4.13726772 | 2.35772411  | 0.20236992  |
| 1 | -2.76832590 | 2.70455587  | -0.79150036 |
| 6 | -3.20166723 | 3.12407752  | 2.66146514  |
| 1 | -4.26997254 | 2.89278515  | 2.51456636  |
| 1 | -2.74503253 | 2.21150218  | 3.07626605  |
| 6 | -3.08769692 | 4.26599566  | 3.67717033  |
| 1 | -3.52652089 | 5.19443629  | 3.28120196  |
| 1 | -2.04489868 | 4.47734844  | 3.95100273  |
| 1 | -3.62152292 | 4.01492926  | 4.60424748  |
| 5 | -2.57592968 | 0.88629969  | 0.38265218  |
| 9 | -2.87145216 | -0.00114280 | -0.57632895 |
| 9 | -1.92766806 | 0.39781941  | 1.44781415  |
| 9 | -0.03802220 | 1.73560413  | -0.85964454 |
| 5 | -0.18721932 | 3.04952378  | -1.09991313 |
| 9 | -0.08665160 | 3.41774764  | -2.38339347 |

## 12'

|   |             |            |             |
|---|-------------|------------|-------------|
| 6 | -0.52648403 | 3.26850852 | 1.71504624  |
| 6 | -1.40966110 | 3.47440339 | -1.29091749 |
| 6 | -2.06334748 | 2.52152172 | -0.26356026 |
| 6 | -1.95628200 | 3.04914216 | 1.18208460  |
| 1 | -2.53268425 | 3.98504460 | 1.26644008  |
| 1 | -0.53761595 | 3.11830160 | 2.81598312  |
| 1 | -1.53917106 | 1.55067477 | -0.30728275 |
| 1 | 0.16046966  | 2.48421069 | 1.35952856  |
| 1 | -1.65103477 | 4.52386125 | -1.06001853 |

|    |             |            |             |
|----|-------------|------------|-------------|
| 1  | -2.46473288 | 2.31789494 | 1.82943787  |
| 1  | -1.88414924 | 3.30161910 | -2.28112827 |
| 6  | -3.54692296 | 2.26149706 | -0.59976612 |
| 1  | -4.00949371 | 1.74087020 | 0.25476168  |
| 1  | -4.06947465 | 3.22948391 | -0.68689149 |
| 6  | -3.77891162 | 1.42867881 | -1.86357342 |
| 1  | -3.29191278 | 0.44562901 | -1.78354675 |
| 1  | -3.38886751 | 1.92072549 | -2.76682505 |
| 1  | -4.85173936 | 1.25849346 | -2.02901634 |
| 17 | 1.00244948  | 4.71939892 | -2.29808628 |
| 5  | 0.10096490  | 3.33546194 | -1.66071775 |
| 17 | 0.95781008  | 1.78424244 | -1.59904799 |
| 17 | 1.91639181  | 4.81477846 | 1.78070967  |
| 17 | -0.75757737 | 6.17612567 | 1.45665130  |
| 5  | 0.16054067  | 4.66889484 | 1.60875025  |

### 13a

|   |             |             |             |
|---|-------------|-------------|-------------|
| 6 | -0.23073695 | 3.93229100  | 0.53540652  |
| 6 | -2.33665273 | 2.48055966  | 0.83118222  |
| 6 | -2.48151887 | 3.83819715  | 1.56845335  |
| 6 | -1.02424011 | 4.31232172  | 1.80953667  |
| 1 | -0.96535061 | 5.38206916  | 2.05187779  |
| 1 | 0.85300126  | 3.82209286  | 0.68201103  |
| 1 | -0.35353542 | 4.71380727  | -0.23954998 |
| 1 | -2.94864300 | 4.55155214  | 0.86314952  |
| 1 | -0.61289598 | 3.76194740  | 2.67360055  |
| 1 | -2.17333925 | 1.67384618  | 1.57543459  |
| 1 | -3.21875323 | 2.17853501  | 0.24899993  |
| 6 | -3.35276304 | 3.77665929  | 2.82791085  |
| 1 | -4.33091404 | 3.34466078  | 2.55959992  |
| 1 | -2.89111335 | 3.06905166  | 3.53905486  |
| 6 | -3.56992259 | 5.12969098  | 3.51370047  |
| 1 | -4.02570163 | 5.85456623  | 2.82223627  |
| 1 | -2.62481240 | 5.56043975  | 3.87329698  |
| 1 | -4.23887236 | 5.03119588  | 4.38004987  |
| 5 | -1.66515088 | -0.32803283 | -1.84409450 |
| 9 | -0.69207288 | -0.50014648 | -2.72895735 |
| 9 | -2.76333984 | 0.34019212  | -2.18391894 |
| 9 | -1.58791056 | -0.90365743 | -0.64837912 |
| 5 | -0.99468710 | 2.65348174  | 0.03727180  |
| 9 | -0.55045063 | 1.82390779  | -0.93686792 |

### 13a'

|   |             |            |             |
|---|-------------|------------|-------------|
| 6 | -0.79982222 | 3.13798722 | 1.79148234  |
| 6 | -1.17382172 | 2.21536547 | -0.57083304 |
| 6 | -2.46477886 | 2.10224591 | 0.28426251  |
| 6 | -2.29278845 | 3.17396766 | 1.38814742  |
| 1 | -2.53190916 | 4.16334048 | 0.96201878  |
| 1 | -0.42094119 | 4.05652155 | 2.26050793  |
| 1 | -2.45111040 | 1.11166473 | 0.77736728  |

|    |             |            |             |
|----|-------------|------------|-------------|
| 1  | -0.62216161 | 2.33004981 | 2.52884926  |
| 1  | -1.29291874 | 3.03650890 | -1.30877735 |
| 1  | -2.98020003 | 3.01202662 | 2.23112679  |
| 1  | -0.91920879 | 1.32223064 | -1.15745456 |
| 6  | -3.78040593 | 2.22956896 | -0.49067139 |
| 1  | -4.61629055 | 2.25671593 | 0.22888618  |
| 1  | -3.78871181 | 3.20469600 | -1.00834552 |
| 6  | -4.02258800 | 1.10671960 | -1.50398871 |
| 1  | -4.02937981 | 0.12322059 | -1.01017096 |
| 1  | -3.24158652 | 1.08646888 | -2.27737305 |
| 1  | -4.98929247 | 1.23100224 | -2.01168730 |
| 17 | 0.85672719  | 5.36784829 | -3.20478433 |
| 5  | 1.22740953  | 6.25683245 | -1.73968858 |
| 17 | 2.86336367  | 6.79899310 | -1.42825650 |
| 17 | 1.65581646  | 2.73918267 | 0.16856644  |
| 17 | -0.05140562 | 6.61919733 | -0.59064258 |
| 5  | -0.09543110 | 2.69710789 | 0.46047380  |

**13b**

|   |             |             |             |
|---|-------------|-------------|-------------|
| 6 | -0.26253395 | 3.93716779  | 0.52823296  |
| 6 | -2.35382926 | 2.46236968  | 0.81480511  |
| 6 | -2.50174470 | 3.82780296  | 1.53011031  |
| 6 | -1.06084870 | 4.33600776  | 1.79730336  |
| 1 | 0.82425121  | 3.86129126  | 0.67540394  |
| 1 | -0.40999190 | 4.70850084  | -0.25579603 |
| 1 | -3.00632470 | 4.54002632  | 0.85405511  |
| 1 | -0.65529922 | 3.74972906  | 2.64371074  |
| 1 | -2.20773279 | 1.65421130  | 1.55773256  |
| 1 | -3.22209697 | 2.16368605  | 0.21105978  |
| 5 | -1.62890263 | -0.34707384 | -1.84765828 |
| 9 | -0.61668455 | -0.54515891 | -2.68181419 |
| 9 | -2.69607587 | 0.33789524  | -2.24710098 |
| 9 | -1.62193472 | -0.91401226 | -0.64530156 |
| 5 | -0.99771923 | 2.63873852  | 0.04239612  |
| 9 | -0.52684449 | 1.79707677  | -0.90855616 |
| 6 | -0.96224488 | 5.82206334  | 2.15888124  |
| 1 | 0.10243656  | 6.09867714  | 2.23340091  |
| 1 | -1.37326372 | 6.41472004  | 1.32245948  |
| 6 | -1.67485960 | 6.20530026  | 3.46026804  |
| 1 | -1.28529973 | 5.62482573  | 4.31028562  |
| 1 | -2.75733651 | 6.02454715  | 3.40021966  |
| 1 | -1.53010766 | 7.27002293  | 3.69101967  |
| 1 | -3.10500857 | 3.77255893  | 2.44643765  |

**13b'**

|   |             |            |             |
|---|-------------|------------|-------------|
| 6 | -2.02785418 | 3.77255885 | 1.93409099  |
| 6 | -1.74099979 | 3.74393848 | -0.61267017 |
| 6 | -2.50102174 | 2.48264379 | -0.12137912 |
| 6 | -3.10238767 | 2.90078443 | 1.24225665  |
| 1 | -4.00533514 | 3.50893231 | 1.06115618  |

|    |             |            |             |
|----|-------------|------------|-------------|
| 1  | -2.40745604 | 4.45488180 | 2.70706214  |
| 1  | -1.74702201 | 1.69702581 | 0.07495380  |
| 1  | -1.28325163 | 3.12811096 | 2.44212416  |
| 1  | -2.45751314 | 4.43699596 | -1.10239363 |
| 1  | -3.41512964 | 2.03168589 | 1.83930020  |
| 1  | -0.95283172 | 3.55814422 | -1.35482410 |
| 6  | -3.53538551 | 1.91529301 | -1.09860379 |
| 1  | -4.09349581 | 1.10650965 | -0.59695950 |
| 1  | -4.27515213 | 2.70346900 | -1.32415483 |
| 6  | -2.93774606 | 1.38161231 | -2.40421926 |
| 1  | -2.20827157 | 0.58186162 | -2.20655425 |
| 1  | -2.42140680 | 2.17399234 | -2.96448986 |
| 1  | -3.71813739 | 0.96718200 | -3.05768085 |
| 17 | -0.12670756 | 5.77409976 | 0.83594169  |
| 5  | -1.29101704 | 4.43833395 | 0.71909076  |
| 17 | 2.13153709  | 2.15301918 | 0.60733608  |
| 17 | 4.03439401  | 4.51584922 | 0.44836490  |
| 17 | 2.49142958  | 3.63743649 | -2.01738236 |
| 5  | 2.88242238  | 3.44324753 | -0.31888070 |

**14**

|    |             |            |             |
|----|-------------|------------|-------------|
| 35 | -4.18674732 | 0.37705476 | -4.06565210 |
| 5  | -4.47005361 | 2.02873680 | -3.13503194 |
| 35 | -3.81403459 | 3.67059811 | -3.87518442 |
| 35 | -5.42194082 | 2.03994229 | -1.47109165 |

**15**

|    |             |             |             |
|----|-------------|-------------|-------------|
| 6  | 0.69577302  | 2.19581431  | 1.19556601  |
| 13 | 0.69331173  | 0.91099188  | -0.31397758 |
| 6  | -0.98685427 | 1.56797454  | -1.14127471 |
| 6  | -1.19614585 | 2.88506601  | -0.34949337 |
| 6  | -0.75548583 | 2.74595732  | 1.13307537  |
| 6  | 1.95247510  | -0.53832383 | -0.81329940 |
| 6  | 1.63458702  | -1.31611991 | -2.10458734 |
| 1  | 0.95275215  | 1.81886194  | 2.19621608  |
| 1  | 1.40649513  | 3.01893217  | 0.98590202  |
| 1  | -0.58436966 | 3.68461580  | -0.80688103 |
| 1  | -1.42052068 | 1.98797183  | 1.59375605  |
| 1  | 2.96133884  | -0.09158608 | -0.87403647 |
| 1  | 2.01121957  | -1.23127716 | 0.04566129  |
| 1  | 2.37737248  | -2.10299232 | -2.30944898 |
| 1  | 0.65019038  | -1.80389365 | -2.05161116 |
| 1  | 1.61288424  | -0.65296957 | -2.98183493 |
| 1  | -1.81347965 | 0.86289973  | -0.93890655 |
| 1  | -0.97971684 | 1.72910127  | -2.22885008 |
| 35 | -4.18717473 | 0.37655561  | -4.06593449 |
| 5  | -4.46872240 | 2.02863907  | -3.13467847 |
| 35 | -3.81453755 | 3.67096209  | -3.87511265 |
| 35 | -5.42234166 | 2.04017519  | -1.47123450 |
| 6  | -0.92381899 | 4.05128098  | 1.93162814  |

|   |             |            |             |
|---|-------------|------------|-------------|
| 1 | -0.49522698 | 3.89853410 | 2.93567284  |
| 1 | -0.30661387 | 4.83325986 | 1.45474108  |
| 6 | -2.36720051 | 4.54886923 | 2.07654799  |
| 1 | -3.00541258 | 3.77829366 | 2.53564907  |
| 1 | -2.81100460 | 4.81579699 | 1.10768800  |
| 1 | -2.41249658 | 5.44122335 | 2.71723280  |
| 1 | -2.24121241 | 3.22833127 | -0.40272597 |

## 16

|    |             |             |             |
|----|-------------|-------------|-------------|
| 6  | 0.44892239  | 2.27135091  | 0.81606087  |
| 13 | 0.22378677  | 0.76722991  | -0.41356162 |
| 6  | -1.69306425 | 1.64190590  | -1.14057231 |
| 6  | -1.72453955 | 2.94029923  | -0.32115939 |
| 6  | -0.96754108 | 2.86039560  | 1.02348196  |
| 6  | 1.00341320  | -0.88385389 | -1.12237829 |
| 6  | 1.58289981  | -0.74920617 | -2.54859110 |
| 1  | 0.92982621  | 2.00201923  | 1.76777799  |
| 1  | 1.10514280  | 3.01980145  | 0.33311199  |
| 1  | -1.31108573 | 3.74867032  | -0.94438117 |
| 1  | -1.53221676 | 2.15744943  | 1.66663300  |
| 1  | 1.78127004  | -1.20929105 | -0.41161206 |
| 1  | 0.21421394  | -1.65233181 | -1.10922049 |
| 1  | 2.02037570  | -1.70279176 | -2.87720288 |
| 1  | 0.80144525  | -0.48226828 | -3.27315803 |
| 1  | 2.37647397  | 0.00989704  | -2.60696351 |
| 1  | -1.79229991 | 0.71505142  | -0.49975420 |
| 1  | -0.82466852 | 1.57485587  | -1.86296116 |
| 35 | -2.44295951 | -0.48667316 | -3.07773826 |
| 5  | -2.89775183 | 1.33929519  | -2.23069912 |
| 35 | -2.88317068 | 2.81391223  | -3.62997714 |
| 35 | -4.66336543 | 1.24318850  | -1.22503511 |
| 6  | -0.92080098 | 4.21682591  | 1.74950617  |
| 1  | -0.31982215 | 4.09578594  | 2.66545837  |
| 1  | -0.37107876 | 4.93353221  | 1.11511195  |
| 6  | -2.29163783 | 4.79388518  | 2.11857841  |
| 1  | -2.87085672 | 4.08343985  | 2.72696407  |
| 1  | -2.88924175 | 5.03915398  | 1.23062932  |
| 1  | -2.17722707 | 5.71661480  | 2.70377382  |
| 1  | -2.78147180 | 3.18246829  | -0.14823437 |

## 17

|    |             |             |             |
|----|-------------|-------------|-------------|
| 6  | 0.41252664  | 2.83377084  | -0.43777284 |
| 13 | 0.52562323  | 1.21582719  | -1.56792008 |
| 6  | -2.38809346 | 1.91065825  | -1.31117970 |
| 6  | -2.13142857 | 3.05390063  | -0.31749584 |
| 6  | -0.82317431 | 2.91561038  | 0.48594428  |
| 6  | 0.52736130  | -0.66393154 | -0.95467935 |
| 6  | 1.78477898  | -1.46802585 | -1.34722770 |
| 1  | 1.32504708  | 2.84435067  | 0.18656568  |
| 1  | 0.47083982  | 3.73470412  | -1.07198541 |



|    |             |             |             |
|----|-------------|-------------|-------------|
| 1  | -2.12230870 | 4.01297414  | -0.86068896 |
| 1  | -0.89299597 | 1.97479446  | 1.06723784  |
| 1  | 0.38813825  | -0.67964595 | 0.13943297  |
| 1  | -0.36599826 | -1.15276576 | -1.38041223 |
| 1  | 1.71009591  | -2.51877456 | -1.02823990 |
| 1  | 1.94053983  | -1.46451497 | -2.43534201 |
| 1  | 2.69502494  | -1.05438501 | -0.88803681 |
| 1  | -2.19042350 | 0.92572764  | -0.84801646 |
| 1  | -1.69769725 | 1.98634162  | -2.18613025 |
| 35 | 0.91238385  | 1.53221049  | -3.82936030 |
| 5  | -3.78837569 | 1.82125284  | -2.01376202 |
| 35 | -5.00565125 | 3.31467963  | -2.07912875 |
| 35 | -4.31830321 | 0.18750823  | -2.89749775 |
| 6  | -0.67199053 | 4.06510997  | 1.50626249  |
| 1  | 0.30980367  | 3.95590713  | 1.99438207  |
| 1  | -0.63256804 | 5.02044325  | 0.95509299  |
| 6  | -1.75663497 | 4.13287891  | 2.58743777  |
| 1  | -1.83922026 | 3.17677360  | 3.12675451  |
| 1  | -2.74561604 | 4.37106314  | 2.17264168  |
| 1  | -1.51882007 | 4.91003613  | 3.32721361  |
| 1  | -2.97989363 | 3.10613260  | 0.37979820  |

**18**

|    |             |             |             |
|----|-------------|-------------|-------------|
| 6  | -1.21975820 | 2.04716290  | -0.11020322 |
| 13 | 0.14014852  | -0.59136516 | -2.80789761 |
| 6  | -3.07467304 | 3.40660774  | -1.24808146 |
| 6  | -2.75136667 | 3.94677817  | 0.16867520  |
| 6  | -2.11565598 | 2.76309895  | 0.93992762  |
| 6  | 1.78713819  | 0.34914608  | -2.27414887 |
| 6  | 3.00265793  | -0.59306461 | -2.16199699 |
| 1  | -0.97260341 | 1.00184846  | 0.12190477  |
| 1  | -0.24728889 | 2.58031832  | -0.18177289 |
| 1  | -2.01129266 | 4.76129627  | 0.08807318  |
| 1  | -2.92950633 | 2.06453647  | 1.20924353  |
| 1  | 1.98372247  | 1.13962987  | -3.01675971 |
| 1  | 1.60828937  | 0.85502069  | -1.31146787 |
| 1  | 3.91241813  | -0.04690212 | -1.86856069 |
| 1  | 2.83792444  | -1.38072812 | -1.41209939 |
| 1  | 3.21600582  | -1.09252181 | -3.11821845 |
| 1  | -3.17786205 | 4.17063046  | -2.03045560 |
| 1  | -4.03964180 | 2.86053857  | -1.23435463 |
| 35 | -0.04866030 | -1.38011358 | -4.96873034 |
| 5  | -1.96662307 | 2.32558245  | -1.44439739 |
| 35 | -1.61427714 | 1.47246646  | -3.18673916 |
| 35 | -0.98987861 | -1.84741893 | -1.22699387 |
| 6  | -1.37240948 | 3.15077299  | 2.22285178  |
| 1  | -0.88231718 | 2.25171502  | 2.63045005  |
| 1  | -0.56008471 | 3.85136687  | 1.96126153  |
| 6  | -2.26388908 | 3.77397815  | 3.30177527  |
| 1  | -3.08331893 | 3.09390030  | 3.57877205  |

1 -2.71237927 4.71918573 2.96462409  
1 -1.68825025 3.98856908 4.21270850  
1 -3.63359808 4.35857652 0.67649834

**19**

13 1.72957834 0.62258349 -3.41501987  
6 1.66035727 -0.34600227 -1.70936384  
6 1.16597051 -1.80087892 -1.76241610  
1 2.67539005 -0.28732176 -1.28032773  
1 1.03234061 0.26219755 -1.03587745  
1 1.15648273 -2.25384130 -0.75967521  
1 0.14643438 -1.87010721 -2.16585485  
1 1.80683938 -2.42488602 -2.40031624  
35 2.42508920 2.78996233 -3.49764967  
35 1.12944250 -0.34100595 -5.38967498

**20**

6 -1.49764691 1.59649107 -0.13069800  
6 -2.96175452 3.42974181 -1.14983928  
6 -2.62083606 3.74999493 0.33030102  
6 -2.28406601 2.37282897 0.95429882  
1 -1.50892436 0.50348010 -0.02151404  
1 -0.42879706 1.88862617 -0.10623715  
1 -1.69352782 4.35375079 0.33509355  
1 -3.22674781 1.84166997 1.17324117  
1 -2.88232587 4.28208679 -1.83854957  
1 -4.01761879 3.09055433 -1.21270949  
5 -2.08299219 2.17301610 -1.46653398  
35 -1.76399110 1.44225015 -3.23269110  
6 -3.70902177 4.54262389 1.06311102  
1 -3.93268001 5.45398304 0.48435412  
1 -4.63774076 3.94519964 1.06376967  
6 -3.34655464 4.93405257 2.49973308  
1 -2.41906445 5.52588638 2.52610559  
1 -3.19731949 4.05058156 3.13636136  
1 -4.14098952 5.54051013 2.95689737  
1 -1.73519564 2.45994811 1.90214689

**21**

6 0.69576071 2.10812950 1.36083800  
13 0.59757467 0.99270980 -0.27657642  
6 -1.06992531 1.80438662 -0.97829390  
6 -1.18597733 3.07985182 -0.09907705  
6 -0.71137232 2.76122880 1.34492983  
6 1.76269843 -0.44381893 -0.99369973  
6 2.99289204 -0.82395655 -0.14781743  
1 0.90825717 1.59881146 2.31162614  
1 1.47568709 2.88329654 1.25028349  
1 -0.48084410 3.83143304 -0.50772449  
1 -1.44240635 2.06095769 1.79006281

|    |             |             |             |
|----|-------------|-------------|-------------|
| 1  | 1.12524669  | -1.33073743 | -1.16124514 |
| 1  | 2.07612188  | -0.13543215 | -2.00751949 |
| 1  | 3.58757719  | -1.62459103 | -0.61498710 |
| 1  | 3.66374677  | 0.03500767  | 0.00063843  |
| 1  | 2.70297194  | -1.17594241 | 0.85315339  |
| 1  | -1.92836953 | 1.13668047  | -0.76924192 |
| 1  | -1.11417060 | 2.03650923  | -2.05250460 |
| 35 | -3.44171008 | -0.53607966 | -4.02827705 |
| 5  | -4.31696197 | 1.13495184  | -3.68506775 |
| 35 | -3.86791808 | 2.68156096  | -4.72529490 |
| 35 | -5.64713449 | 1.25616986  | -2.31126891 |
| 6  | -2.59507135 | 3.69782891  | -0.14384548 |
| 1  | -2.89169522 | 3.80400080  | -1.20004777 |
| 1  | -3.30520673 | 2.97750247  | 0.29940654  |
| 6  | -2.73730899 | 5.05769260  | 0.55034405  |
| 1  | -2.02286785 | 5.78714213  | 0.13878843  |
| 1  | -2.55877669 | 4.99007983  | 1.63230219  |
| 1  | -3.74746340 | 5.46776329  | 0.40821574  |
| 1  | -0.74020901 | 3.67191782  | 1.96346961  |

22

|    |             |             |             |
|----|-------------|-------------|-------------|
| 6  | 0.51627654  | 2.59970322  | -0.32880560 |
| 13 | 0.54720630  | 0.96890517  | -1.44784141 |
| 6  | -2.30690868 | 2.03080021  | -1.37584443 |
| 6  | -2.04185121 | 3.07960130  | -0.26659923 |
| 6  | -0.75860186 | 2.75762246  | 0.52515722  |
| 6  | 0.24613493  | -0.87998049 | -0.81781554 |
| 6  | -0.38387523 | -1.85587836 | -1.82960454 |
| 1  | 1.39345186  | 2.55227628  | 0.34069480  |
| 1  | 0.66846604  | 3.48807869  | -0.96300821 |
| 1  | -1.90248412 | 4.05647254  | -0.76224855 |
| 1  | -0.93723564 | 1.84029840  | 1.11576126  |
| 1  | 1.23710091  | -1.25856089 | -0.50572190 |
| 1  | -0.35111679 | -0.84048403 | 0.10897030  |
| 1  | -0.45336424 | -2.87612651 | -1.42230799 |
| 1  | -1.40198912 | -1.54888523 | -2.11106306 |
| 1  | 0.20304659  | -1.90755539 | -2.75696634 |
| 1  | -2.34101447 | 1.01603218  | -0.94523661 |
| 1  | -1.47174671 | 2.06785437  | -2.11456512 |
| 35 | 1.17411887  | 1.21077436  | -3.66189085 |
| 5  | -3.56795386 | 2.25980416  | -2.28038789 |
| 35 | -3.87630106 | 3.96221160  | -3.14109045 |
| 35 | -4.82592464 | 0.83794734  | -2.63067798 |
| 6  | -3.26993824 | 3.18609006  | 0.66124552  |
| 1  | -4.16803132 | 3.34242374  | 0.04022543  |
| 1  | -3.41710388 | 2.21692401  | 1.16896367  |
| 6  | -3.20020522 | 4.30918425  | 1.70083427  |
| 1  | -3.01464453 | 5.28093046  | 1.21928490  |
| 1  | -2.40652225 | 4.14251242  | 2.44117139  |
| 1  | -4.14942114 | 4.38586117  | 2.24895667  |

1 -0.60621380 3.56212637 1.26205298

**23**

6 -1.49353351 1.58870352 -0.12334660  
13 -0.63009948 -0.99749813 -3.06248779  
6 -2.95655165 3.42951282 -1.14963057  
6 -2.61576509 3.75051915 0.33297370  
6 -2.27996621 2.37334499 0.95845107  
6 1.15362434 -0.56659638 -2.34521758  
6 2.08158124 -1.79623298 -2.27550534  
1 -1.50702381 0.49560204 -0.01401916  
1 -0.42413995 1.88204496 -0.10384858  
1 -1.68939658 4.35497444 0.33637023  
1 -3.22101040 1.84103832 1.17836278  
1 1.59798328 0.21218094 -2.98612816  
1 1.03414914 -0.12352962 -1.34316865  
1 3.07414629 -1.53188975 -1.87920724  
1 1.66794347 -2.57991370 -1.62406995  
1 2.23478820 -2.24384556 -3.26817850  
1 -2.87891709 4.27955454 -1.84115365  
1 -4.01150211 3.08633148 -1.21266684  
35 -0.84424001 -1.47375500 -5.31071071  
5 -2.08318095 2.17283146 -1.44041702  
35 -1.79735936 1.46960382 -3.26001331  
35 -2.14872762 -2.08923246 -1.70032444  
6 -3.70849453 4.54261244 1.05936736  
1 -3.93040180 5.45288110 0.47860728  
1 -4.63609879 3.94384575 1.05692174  
6 -3.35069503 4.93440418 2.49665726  
1 -2.42367930 5.52658970 2.52683090  
1 -3.20494742 4.05136892 3.13444936  
1 -4.14743488 5.54062955 2.94932208  
1 -1.72769634 2.46088332 1.90342303

**24**

6 -1.31340192 6.27173436 -3.80425421  
13 -0.66971405 5.82572427 -5.61907491  
6 -3.35435897 7.12327044 -5.94039911  
6 -3.60852675 7.21048012 -4.42758848  
6 -2.83998137 6.16757343 -3.59213626  
6 -0.92737520 4.10451841 -6.55438252  
6 -0.94057523 4.14157736 -8.09398930  
1 -0.80887158 5.57354155 -3.11137241  
1 -0.96304867 7.28153933 -3.53054377  
1 -3.34744596 8.22081188 -4.07254825  
1 -3.17534792 5.16605485 -3.92690776  
1 -0.10517004 3.45201619 -6.20570525  
1 -1.84728216 3.63319572 -6.16779864  
1 -1.01914806 3.13166865 -8.52459896  
1 -1.78758196 4.72783542 -8.47943233

|    |             |            |             |
|----|-------------|------------|-------------|
| 1  | -0.02571592 | 4.60222073 | -8.49157213 |
| 1  | -3.38916218 | 6.07520265 | -6.29284348 |
| 1  | -2.33362545 | 7.50113447 | -6.19190527 |
| 35 | 0.72214778  | 7.36194937 | -6.65581992 |
| 5  | -4.25563448 | 7.96718007 | -6.90882840 |
| 35 | -5.33075019 | 9.44395136 | -6.29325089 |
| 35 | -4.27050942 | 7.56846062 | -8.79906579 |
| 6  | -3.19406298 | 6.28407371 | -2.09340047 |
| 1  | -2.56527305 | 5.56681144 | -1.54196130 |
| 1  | -2.89532037 | 7.28582059 | -1.73947628 |
| 6  | -4.66343632 | 6.02522124 | -1.74152876 |
| 1  | -4.99475555 | 5.04530803 | -2.11804642 |
| 1  | -5.33360278 | 6.78946488 | -2.15835044 |
| 1  | -4.80683975 | 6.02645098 | -0.65197466 |
| 1  | -4.68691083 | 7.09341262 | -4.24821376 |
| 35 | 0.80070649  | 8.55605112 | -0.01223858 |
| 5  | 1.63257849  | 7.06961619 | -0.89201042 |
| 35 | 1.50080186  | 5.31323719 | -0.12774633 |
| 35 | 2.58497777  | 7.33215920 | -2.53159970 |

25

|    |             |             |             |
|----|-------------|-------------|-------------|
| 6  | 0.29915052  | 4.22435776  | 1.59414002  |
| 13 | 1.04083705  | 0.29244419  | -3.67924307 |
| 6  | -1.24032175 | 2.08208086  | -0.16462983 |
| 6  | -1.62732033 | 3.55059570  | 0.06394867  |
| 6  | -1.23348124 | 4.10018184  | 1.44925262  |
| 6  | 2.35734614  | -1.06360684 | -3.13120807 |
| 6  | 2.00373564  | -2.52542972 | -3.45043668 |
| 1  | 0.78664381  | 3.27617455  | 1.28626107  |
| 1  | 0.68459055  | 4.97739303  | 0.88734055  |
| 1  | -1.16647150 | 4.17706888  | -0.71748671 |
| 1  | -1.59642235 | 3.39214402  | 2.21531796  |
| 1  | 3.29416107  | -0.77654793 | -3.64116554 |
| 1  | 2.55198186  | -0.92635738 | -2.05538008 |
| 1  | 2.81633675  | -3.20894672 | -3.16068641 |
| 1  | 1.10002248  | -2.85519032 | -2.91647916 |
| 1  | 1.81521643  | -2.67109109 | -4.52327143 |
| 1  | -1.68950008 | 1.44348900  | 0.62429896  |
| 1  | -0.15415917 | 1.92339461  | -0.04498154 |
| 35 | 1.32529079  | 2.47885102  | -2.95367947 |
| 5  | -1.64179932 | 1.43160061  | -1.51633160 |
| 35 | -2.84019946 | 2.15789016  | -2.80825759 |
| 35 | -0.97600253 | -0.42159025 | -1.88190197 |
| 6  | -1.89372909 | 5.46760129  | 1.72319668  |
| 1  | -1.45420222 | 5.88807097  | 2.64291757  |
| 1  | -1.62080357 | 6.16401667  | 0.91154395  |
| 6  | -3.41573830 | 5.42883838  | 1.88840102  |
| 1  | -3.70630307 | 4.74285902  | 2.69789618  |
| 1  | -3.92817163 | 5.10501037  | 0.97197092  |
| 1  | -3.80346652 | 6.42521558  | 2.14151470  |

|    |             |            |             |
|----|-------------|------------|-------------|
| 1  | -2.71435702 | 3.64989806 | -0.06829460 |
| 35 | 0.11186127  | 3.70717605 | 4.61144349  |
| 5  | 0.88596177  | 4.49166492 | 3.01802866  |
| 35 | -0.08769037 | 0.10167538 | -5.66986146 |
| 35 | 2.48765662  | 5.54850288 | 3.24861390  |

## 26

|    |             |            |             |
|----|-------------|------------|-------------|
| 6  | 0.33538250  | 4.30907516 | 0.54071612  |
| 6  | -1.41586092 | 2.43556137 | -1.27704990 |
| 6  | -1.94910169 | 3.39643854 | -0.19410824 |
| 6  | -0.99673700 | 3.66271991 | 0.98905478  |
| 1  | 0.16472305  | 5.06848079 | -0.23889118 |
| 1  | 0.73589269  | 4.89887962 | 1.39552333  |
| 1  | -2.22954258 | 4.35847357 | -0.65420982 |
| 1  | -0.76796932 | 2.69260918 | 1.46424140  |
| 1  | -2.28045765 | 1.89806382 | -1.72390453 |
| 1  | -0.81868108 | 1.62369932 | -0.83200242 |
| 5  | -0.70835776 | 2.97140750 | -2.56274995 |
| 35 | -1.00124938 | 4.75517640 | -3.25711246 |
| 35 | 0.39047374  | 1.78563834 | -3.62516670 |
| 6  | -1.67767155 | 4.54943442 | 2.05497054  |
| 1  | -0.93817998 | 4.75183846 | 2.84709102  |
| 1  | -1.91891460 | 5.52813456 | 1.60519053  |
| 6  | -2.93258722 | 3.95345658 | 2.70088922  |
| 1  | -2.72755857 | 2.95518964 | 3.11645752  |
| 1  | -3.76414075 | 3.85755972 | 1.98981573  |
| 1  | -3.28204421 | 4.59062024 | 3.52519968  |
| 1  | -2.87557642 | 2.96899060 | 0.21454438  |
| 35 | 1.88503037  | 1.68137351 | 0.93130459  |
| 5  | 1.58366079  | 3.44294444 | 0.18218238  |
| 35 | 2.99284412  | 4.17758534 | -0.92098185 |

## 27

|    |            |             |             |
|----|------------|-------------|-------------|
| 6  | 4.94473309 | 3.35126025  | -2.07238329 |
| 13 | 6.10170620 | 2.74752656  | -3.55895692 |
| 6  | 3.95598299 | 0.63424416  | -3.08528940 |
| 6  | 3.43640729 | 1.25321968  | -1.76391585 |
| 6  | 4.46722881 | 2.21668032  | -1.14320062 |
| 6  | 7.74191176 | 1.66124629  | -3.37560613 |
| 6  | 8.06587202 | 0.69778404  | -4.53313816 |
| 1  | 5.53415191 | 4.07595320  | -1.48251748 |
| 1  | 4.08571585 | 3.91285794  | -2.47436249 |
| 1  | 2.52797018 | 1.83261257  | -2.00529275 |
| 1  | 5.33138717 | 1.62248797  | -0.79326221 |
| 1  | 8.56984146 | 2.38377674  | -3.25230031 |
| 1  | 7.69187179 | 1.11560713  | -2.41792359 |
| 1  | 9.02730114 | 0.18457146  | -4.37904036 |
| 1  | 7.29587708 | -0.08012345 | -4.64264149 |
| 1  | 8.12318323 | 1.22897890  | -5.49331154 |
| 1  | 4.92717665 | 0.13732318  | -2.92184988 |

|    |            |             |             |
|----|------------|-------------|-------------|
| 1  | 4.10573486 | 1.44967165  | -3.83224748 |
| 35 | 5.61879229 | 3.53514858  | -5.68016178 |
| 5  | 2.98890346 | -0.33946287 | -3.84457947 |
| 35 | 1.16014280 | 0.16448760  | -4.21477189 |
| 35 | 3.59813270 | -2.04713840 | -4.50741852 |
| 6  | 3.04064084 | 0.13362506  | -0.77891696 |
| 1  | 2.36001063 | -0.56451720 | -1.29471046 |
| 1  | 3.94119621 | -0.45201837 | -0.52449799 |
| 6  | 2.35617094 | 0.61342405  | 0.50500818  |
| 1  | 1.47155384 | 1.22570273  | 0.27505222  |
| 1  | 3.02638320 | 1.21387414  | 1.13422362  |
| 1  | 2.02150988 | -0.24343700 | 1.10594617  |
| 1  | 4.01851219 | 2.65119734  | -0.23601317 |
| 35 | 3.40989549 | 7.52714133  | -1.02448970 |
| 5  | 2.93061667 | 6.12957918  | 0.19355471  |
| 35 | 1.31675609 | 5.12991830  | -0.07682290 |
| 35 | 4.06215146 | 5.73045953  | 1.69088590  |

28

|    |            |             |             |
|----|------------|-------------|-------------|
| 6  | 4.57601810 | 3.63249863  | -1.70149699 |
| 13 | 5.70137857 | 2.95174105  | -3.42787398 |
| 6  | 3.88134418 | 0.87659964  | -3.04830566 |
| 6  | 3.34827801 | 1.33410899  | -1.66859557 |
| 6  | 4.33913639 | 2.28814455  | -0.97817735 |
| 6  | 7.41669043 | 2.07209623  | -3.06821466 |
| 6  | 7.87750624 | 1.07448193  | -4.14651253 |
| 1  | 5.62961650 | 4.00601281  | -1.69656387 |
| 1  | 4.01600728 | 3.80235998  | -2.65292126 |
| 1  | 2.40188252 | 1.87651592  | -1.82832426 |
| 1  | 5.29236387 | 1.75739520  | -0.81424008 |
| 1  | 8.13899678 | 2.90400894  | -2.98481842 |
| 1  | 7.38832795 | 1.60104746  | -2.07370720 |
| 1  | 8.88169590 | 0.68941462  | -3.91767176 |
| 1  | 7.20464980 | 0.20801479  | -4.21991704 |
| 1  | 7.92038749 | 1.54090964  | -5.14009740 |
| 1  | 4.88514738 | 0.42772980  | -2.95293200 |
| 1  | 3.91951114 | 1.74637249  | -3.75843235 |
| 35 | 5.09370010 | 3.75377933  | -5.46564240 |
| 5  | 2.95900288 | -0.10765077 | -3.87552142 |
| 35 | 1.11931725 | 0.33293566  | -4.20742945 |
| 35 | 3.67432357 | -1.73101596 | -4.62150703 |
| 6  | 3.05857374 | 0.10306889  | -0.78500707 |
| 1  | 2.41964575 | -0.59154189 | -1.35608443 |
| 1  | 4.00333085 | -0.43717905 | -0.59841195 |
| 6  | 2.36509748 | 0.41955122  | 0.54353610  |
| 1  | 1.44220778 | 0.99347751  | 0.37996356  |
| 1  | 3.00458434 | 1.00116059  | 1.22022030  |
| 1  | 2.09790731 | -0.51007526 | 1.06387225  |
| 1  | 3.96498753 | 2.54195350  | 0.02271819  |
| 35 | 4.52188569 | 6.57115771  | -2.15925150 |

5 3.96225179 5.02111564 -0.95070860  
35 1.94313789 4.83987670 -0.82139001  
35 4.81791843 5.16775645 0.88784516

**29**

6 4.91911936 2.56987500 -1.65663736  
13 5.76259158 4.64914231 -4.94466315  
6 3.38589786 -0.04813673 -2.61995749  
6 3.24137716 0.64061623 -1.24615507  
6 4.55455666 1.32898148 -0.82181416  
6 5.52563853 6.35467954 -5.89914567  
6 6.21403881 7.58809542 -5.29062940  
1 5.96879377 2.86719679 -1.44484317  
1 4.94596521 2.34322275 -2.73586870  
1 2.45509812 1.41153027 -1.32682835  
1 5.37618809 0.59773404 -0.89604961  
1 5.91180172 6.16450262 -6.91627863  
1 4.44386063 6.52442077 -6.02776652  
1 6.08242666 8.47685955 -5.92627057  
1 5.80791251 7.83750502 -4.29924470  
1 7.29370779 7.42769487 -5.16409779  
1 4.08080378 -0.90099369 -2.54328548  
1 3.87047089 0.63471987 -3.34903206  
35 7.75717831 4.18655564 -3.87944285  
5 2.08984006 -0.49918517 -3.36694482  
35 0.42031530 0.47193652 -3.21765636  
35 2.12045681 -2.01223854 -4.56989610  
6 2.77710661 -0.38963264 -0.19588739  
1 1.94836389 -0.97534788 -0.62669669  
1 3.59538470 -1.10922681 -0.01832924  
6 2.30753533 0.20613482 1.13465913  
1 1.47857453 0.91171291 0.97797106  
1 3.10988831 0.74187192 1.66074365  
1 1.94905589 -0.58491848 1.80779356  
1 4.49216433 1.61842331 0.23713921  
35 4.63008762 2.78256756 -5.70481768  
5 4.12322509 3.87745762 -1.42428120  
35 4.18340864 5.33666725 -2.76497204  
35 3.10702564 4.31145057 0.14248289

**30a**

6 -0.90891408 5.14427091 -0.06460370  
6 -1.80204770 3.09073675 -1.30176918  
6 -2.72653563 3.46837865 -0.11342708  
6 -1.81329897 4.27510920 0.84332424  
1 -1.43941291 6.07299767 -0.35477197  
1 0.03256564 5.47443747 0.39548110  
1 -3.49893552 4.16076766 -0.49871059  
1 -1.18666118 3.56836641 1.41452395  
1 -2.32557840 2.83400515 -2.23300840



|    |             |            |             |
|----|-------------|------------|-------------|
| 1  | -1.21172672 | 2.18993946 | -1.03060557 |
| 5  | -0.78138018 | 4.27571230 | -1.36358387 |
| 35 | 0.45004533  | 4.62341160 | -2.82184730 |
| 35 | 1.94503739  | 0.30580038 | -1.82769270 |
| 35 | 2.33295101  | 2.30010188 | 0.79822250  |
| 5  | 2.93851507  | 1.66270357 | -0.90902780 |
| 35 | 4.54105664  | 2.37149548 | -1.67920321 |
| 6  | -3.43663462 | 2.27107306 | 0.52829611  |
| 1  | -3.97716859 | 1.71818962 | -0.25762726 |
| 1  | -2.67050377 | 1.57803752 | 0.91799516  |
| 6  | -4.41508260 | 2.64179606 | 1.64781459  |
| 1  | -5.18757099 | 3.33612317 | 1.28394087  |
| 1  | -3.90276151 | 3.12501464 | 2.49170701  |
| 1  | -4.92636737 | 1.75050873 | 2.03781443  |
| 1  | -2.38323182 | 4.86520860 | 1.57422993  |

**30b**

|    |             |            |             |
|----|-------------|------------|-------------|
| 6  | -0.61677755 | 4.70789093 | -0.36706503 |
| 6  | -2.14532655 | 3.09711749 | -1.63513332 |
| 6  | -2.65920174 | 3.36736322 | -0.19937293 |
| 6  | -1.42102273 | 3.81656388 | 0.61607002  |
| 1  | -1.05363840 | 5.72931636 | -0.37012375 |
| 1  | 0.44314292  | 4.84449723 | -0.11129651 |
| 1  | -3.38997945 | 4.19446589 | -0.22165592 |
| 1  | -0.81538029 | 2.91406599 | 0.82186418  |
| 1  | -2.91173989 | 3.14424564 | -2.42082400 |
| 1  | -1.71566819 | 2.07757104 | -1.69869053 |
| 5  | -0.94316861 | 4.09501326 | -1.77049792 |
| 35 | -0.01077789 | 4.50590692 | -3.41916128 |
| 35 | 1.96496027  | 0.82467689 | -0.93126378 |
| 6  | -1.73691821 | 4.49150197 | 1.95524484  |
| 1  | -0.79499437 | 4.85652621 | 2.39706556  |
| 1  | -2.35073134 | 5.38886670 | 1.76152497  |
| 6  | -2.44969226 | 3.58610299 | 2.96537541  |
| 1  | -1.85686065 | 2.68218519 | 3.17170924  |
| 1  | -3.43394287 | 3.26299764 | 2.59804824  |
| 1  | -2.60758895 | 4.10619225 | 3.92062459  |
| 1  | -3.16616898 | 2.50008097 | 0.24571633  |
| 35 | 2.59418992  | 2.45007908 | 1.89485857  |
| 5  | 2.86326832  | 2.23582600 | 0.00657042  |
| 35 | 4.01739405  | 3.43429728 | -0.93858320 |

**33**

|    |             |             |             |
|----|-------------|-------------|-------------|
| 6  | -2.67556496 | 0.14075338  | 0.79855271  |
| 13 | -0.71682319 | 0.35768878  | 1.09807977  |
| 6  | -0.49657770 | 1.86658425  | -0.47739930 |
| 6  | -1.93799190 | 2.37643150  | -0.12758871 |
| 6  | -3.04351537 | 1.29507050  | -0.17856238 |
| 6  | 3.00800544  | -0.95988862 | 0.01091323  |
| 6  | 2.57954732  | 0.37564525  | -0.64404255 |

|    |             |             |             |
|----|-------------|-------------|-------------|
| 13 | 0.65933610  | 0.11236932  | -1.07241470 |
| 6  | 0.52516449  | -1.32896699 | 0.57865740  |
| 6  | 1.98642314  | -1.36418893 | 1.09547691  |
| 6  | 0.04423254  | 1.05898723  | 2.80358065  |
| 6  | -0.75741631 | 2.16515969  | 3.51645704  |
| 6  | 0.05213030  | -0.64341835 | -2.82150750 |
| 6  | -0.61839653 | -2.03085646 | -2.83007212 |
| 1  | 2.98039096  | -1.74659084 | -0.77034569 |
| 6  | 5.00047060  | -2.24581104 | 1.07291826  |
| 1  | -3.97341573 | 1.78968503  | 0.15702817  |
| 6  | -4.58841444 | 0.01491584  | -1.78778170 |
| 1  | -2.98358259 | -0.83797068 | 0.40232381  |
| 1  | 3.21676022  | 0.59986594  | -1.51350154 |
| 1  | 2.72543936  | 1.19780324  | 0.07896428  |
| 1  | 0.40161929  | -2.05996163 | -0.24644502 |
| 1  | -2.19864749 | 3.22304957  | -0.78457373 |
| 1  | 2.09103122  | -0.67338065 | 1.94871801  |
| 1  | 2.22133670  | -2.36967531 | 1.47856357  |
| 1  | -0.61080345 | 0.08491453  | -3.31932315 |
| 1  | 0.95783566  | -0.67921128 | -3.45324691 |
| 1  | -0.90268154 | -2.34872459 | -3.84575544 |
| 1  | 0.05066953  | -2.80896647 | -2.43110591 |
| 1  | -1.53272212 | -2.05110910 | -2.21766553 |
| 1  | 4.94235271  | -3.02607268 | 0.29840056  |
| 1  | 6.05606652  | -2.14729022 | 1.36398228  |
| 1  | 4.45033206  | -2.60686989 | 1.95306212  |
| 1  | -3.21172017 | 0.26067169  | 1.75389855  |
| 6  | 4.44903791  | -0.91230885 | 0.55441858  |
| 1  | -0.41590106 | 1.95207721  | -1.58115570 |
| 1  | 0.24444768  | 2.58382336  | -0.09098170 |
| 1  | -0.13967103 | -1.78886768 | 1.33916518  |
| 1  | -1.91911020 | 2.78696753  | 0.89652934  |
| 6  | -3.28936608 | 0.80737465  | -1.61572310 |
| 1  | 0.13620553  | 0.18989525  | 3.48140725  |
| 1  | 1.07965471  | 1.40264066  | 2.64109897  |
| 1  | -0.32712138 | 2.42268246  | 4.49739908  |
| 1  | -0.78226577 | 3.09479170  | 2.92766908  |
| 1  | -1.80249651 | 1.86703290  | 3.69082369  |
| 1  | -5.46162001 | 0.62952419  | -1.52192109 |
| 1  | -4.71631925 | -0.31748851 | -2.82767122 |
| 1  | -4.60578559 | -0.87955610 | -1.14880058 |
| 1  | -2.43795140 | 0.18715104  | -1.94021962 |
| 1  | -3.31016836 | 1.67970976  | -2.29232875 |
| 1  | 4.49448147  | -0.15274070 | 1.35426857  |
| 1  | 5.10305928  | -0.54334033 | -0.25222671 |

**34a**

|    |             |             |            |
|----|-------------|-------------|------------|
| 6  | -5.15220273 | -0.68836183 | 0.31666387 |
| 13 | -0.92127420 | -2.22571464 | 2.26421614 |
| 6  | -2.08094591 | -1.60243978 | 0.54425663 |

6 -2.76679958 -0.40376921 1.25116167  
6 -3.93173139 0.26446041 0.48069378  
6 2.47546914 -1.94851456 -0.02727067  
6 1.21598970 -1.35678213 -0.70401716  
13 -0.25406593 -2.59061874 -0.21400961  
6 0.86883288 -3.18215424 1.55254267  
6 2.15365253 -2.32416851 1.43505062  
6 -0.31372307 -0.81053249 3.51616487  
6 -1.29890768 -0.37774890 4.61885177  
6 -0.99743867 -4.10332325 -1.25332691  
6 0.05711670 -4.99553568 -1.93844623  
1 2.73393038 -2.88922267 -0.55340375  
6 5.01826064 -1.60247229 0.36555517  
1 -4.28542463 1.06980269 1.15053068  
6 -4.51139899 1.85291883 -1.46771463  
1 -5.98534581 -0.09108526 -0.10081442  
1 1.37441113 -1.24027407 -1.78708411  
1 1.03046470 -0.34371857 -0.30266264  
1 0.98372511 -4.11716361 0.96313556  
1 -2.02105897 0.37745338 1.46676403  
1 2.03171397 -1.39435350 2.01639945  
1 3.00262046 -2.86238980 1.88361325  
1 -1.63390780 -4.71401421 -0.59149341  
1 -1.67951894 -3.68975845 -2.01635780  
1 -0.40669080 -5.80434180 -2.52413501  
1 0.69417697 -4.42102756 -2.62782207  
1 0.72602595 -5.47733252 -1.20830880  
1 5.25039013 -2.54942056 -0.14539114  
1 5.85187625 -0.91146007 0.17623928  
1 4.99732908 -1.80168617 1.44603803  
1 -5.48151117 -0.99434202 1.32101735  
6 3.69515775 -1.01442074 -0.13849189  
1 -2.80514838 -2.42385009 0.41701587  
1 -1.86258401 -1.23310795 -0.48247112  
1 0.79901714 -3.61667714 2.56972656  
1 -3.15627221 -0.73504051 2.22906797  
6 -3.45524474 0.96229397 -0.80559343  
1 0.59645356 -1.21669728 3.99357497  
1 0.03306301 0.07195572 2.95117045  
1 -0.82960954 0.31408611 5.33540960  
1 -2.17886538 0.13660980 4.20568213  
1 -1.67068170 -1.24167617 5.18809608  
1 -4.91123295 2.59168880 -0.75660642  
1 -4.08002864 2.40493281 -2.31399879  
1 -5.35530149 1.26746750 -1.85809396  
1 -3.09632868 0.22683307 -1.54093590  
1 -2.58255727 1.58262381 -0.53946219  
1 3.46966094 -0.08082745 0.40599043  
1 3.80844230 -0.72938923 -1.19689351  
17 -2.17749572 -3.77904515 3.10586282

5 -5.09131052 -1.96787195 -0.58682668  
17 -4.73681180 -1.90841421 -2.32896316  
17 -5.54660295 -3.55578279 0.05485223

**34b**

6 -4.14355343 -0.13495180 0.19360937  
13 -2.59025299 -0.83756864 1.20649566  
6 -1.11582522 0.33624756 0.14927968  
6 -2.20497338 1.46939825 0.06164991  
6 -3.52808849 1.04171205 -0.61563866  
6 2.03383187 -3.12126073 0.79420841  
6 1.24617158 -1.79331171 0.80952854  
13 -0.36113371 -1.67517529 -0.35655622  
6 2.24956671 -3.45472786 3.36201589  
6 2.98327847 -3.24589480 2.00931037  
6 -2.29712212 -0.71177038 3.16416671  
6 -3.34581536 -1.47602688 3.99789006  
6 -0.44804098 -2.03836296 -2.30623275  
6 0.32569584 -1.06200114 -3.21257271  
1 1.32276724 -3.96739181 0.85241166  
6 3.36275047 -4.67450737 -0.80763903  
1 -4.19569358 1.92119273 -0.57250039  
6 -4.62052402 0.61035795 -2.90156259  
1 -4.64551407 -0.86646677 -0.45450399  
1 1.93921848 -0.96667459 0.56314602  
1 0.88675092 -1.57494282 1.83039299  
1 1.64339148 -4.37123117 3.29883117  
1 -1.76994854 2.34634818 -0.44502609  
1 3.60595238 -2.33701079 2.06021242  
1 3.67001642 -4.09260713 1.85319038  
1 -0.05840547 -3.06231756 -2.44846573  
1 -1.50282019 -2.09293371 -2.62222031  
1 0.28285173 -1.35711582 -4.27252545  
1 -0.07943526 -0.03918528 -3.15439474  
1 1.39011897 -1.00079263 -2.93799382  
1 2.54534991 -5.41042513 -0.83999892  
1 3.87827669 -4.70705253 -1.77773829  
1 4.08161359 -5.00778975 -0.04624836  
1 -4.90871170 0.23387591 0.89492309  
6 2.82353073 -3.26871651 -0.52390129  
1 -0.61517443 0.38448842 -0.84180219  
1 -0.34925927 0.64780260 0.87519581  
1 1.56950075 -2.60812799 3.54300219  
1 -2.43899890 1.80356147 1.08871872  
6 -3.31834678 0.70459155 -2.10124630  
1 -1.28734695 -1.08337116 3.40607692  
1 -2.29874331 0.35358493 3.45444403  
1 -3.16472062 -1.38116091 5.07991085  
1 -4.36516506 -1.10696946 3.80727637  
1 -3.34488636 -2.55126734 3.76344251

|    |             |             |             |
|----|-------------|-------------|-------------|
| 1  | -5.16464799 | 1.56635655  | -2.87940672 |
| 1  | -4.42276904 | 0.36096173  | -3.95335816 |
| 1  | -5.28937617 | -0.16259046 | -2.49733614 |
| 1  | -2.77029297 | -0.24871383 | -2.18414740 |
| 1  | -2.67324893 | 1.47631396  | -2.55656710 |
| 1  | 3.65472057  | -2.54208176 | -0.51912669 |
| 1  | 2.16949122  | -2.96967131 | -1.35911296 |
| 17 | -2.01126301 | -3.03224405 | 0.60514125  |
| 5  | 3.27623390  | -3.55979500 | 4.53196339  |
| 17 | 3.93869416  | -2.11015504 | 5.30817931  |
| 17 | 3.88594797  | -5.12296326 | 5.10077451  |

### TS(5a-6a)

$v = 81.20i \text{ cm}^{-1}$

|    |             |             |             |
|----|-------------|-------------|-------------|
| 6  | -0.05127758 | 1.75052493  | 1.47926007  |
| 13 | -0.24812462 | 0.74412537  | -0.25077369 |
| 6  | -1.79107161 | 1.81175319  | -0.88051776 |
| 6  | -1.68928453 | 3.07854329  | 0.01187019  |
| 6  | -1.29723023 | 2.67241553  | 1.45567594  |
| 6  | 1.08189955  | -0.33448685 | -1.24484483 |
| 6  | 2.20767832  | -1.01084469 | -0.43964607 |
| 1  | -1.13664014 | 3.57041593  | 2.07285656  |
| 1  | 0.14695558  | 1.36608773  | 2.49067496  |
| 1  | 0.85789270  | 2.35012535  | 1.26268868  |
| 1  | -0.86179509 | 3.70239251  | -0.38326718 |
| 1  | -2.15471984 | 2.13813406  | 1.90214304  |
| 1  | 0.52906305  | -1.08846062 | -1.83261225 |
| 1  | 1.51847993  | 0.34186691  | -2.00291298 |
| 1  | 2.91992711  | -1.54135367 | -1.09087775 |
| 1  | 2.78465116  | -0.28036906 | 0.14645323  |
| 1  | 1.81154086  | -1.74910900 | 0.27249917  |
| 1  | -2.73812193 | 1.28536492  | -0.65837416 |
| 1  | -1.82051047 | 2.07010932  | -1.94894336 |
| 6  | -2.96815728 | 3.93472588  | -0.03910949 |
| 1  | -3.22545570 | 4.10279860  | -1.09756779 |
| 1  | -3.79869761 | 3.34394875  | 0.38570729  |
| 6  | -2.87898135 | 5.28941340  | 0.67387462  |
| 1  | -2.04018728 | 5.88663408  | 0.28429473  |
| 1  | -2.73401916 | 5.17694766  | 1.75719542  |
| 1  | -3.79850604 | 5.87315710  | 0.52402457  |
| 9  | 0.27218520  | -1.25625924 | 2.66693432  |
| 5  | -0.87598161 | -0.78704126 | 2.20498419  |
| 9  | -1.22020243 | -1.05891026 | 0.91317597  |
| 9  | -1.80500106 | -0.30517393 | 3.01400831  |

### TS(5a'-6a')

$v = 160.99i \text{ cm}^{-1}$

|    |             |            |            |
|----|-------------|------------|------------|
| 6  | 1.47146505  | 3.06726566 | 0.53726126 |
| 13 | 1.02219686  | 1.11725948 | 0.11960705 |
| 6  | -0.93445938 | 1.29018470 | 0.40607966 |

|    |             |             |             |
|----|-------------|-------------|-------------|
| 6  | -1.06396502 | 2.74464039  | 0.92498660  |
| 6  | 0.03709765  | 3.60914369  | 0.26206145  |
| 6  | 1.95605884  | 0.08528389  | -1.29528179 |
| 6  | 3.49480276  | 0.07466472  | -1.31475755 |
| 1  | -0.14975457 | 3.61471645  | -0.82814166 |
| 1  | 1.85633414  | 3.53493960  | 1.44740739  |
| 1  | -0.85831133 | 2.73740521  | 2.01181245  |
| 1  | 2.19251364  | 3.34179978  | -0.25164629 |
| 1  | -1.45248260 | 1.19306420  | -0.56651582 |
| 1  | -0.04819108 | 4.65699538  | 0.59373853  |
| 1  | 1.57024903  | -0.94878578 | -1.25898415 |
| 1  | 1.57528580  | 0.49308320  | -2.25058686 |
| 1  | 3.89284355  | -0.49956844 | -2.16618255 |
| 1  | 3.90788672  | 1.09144560  | -1.38714459 |
| 1  | 3.90979406  | -0.37464290 | -0.40084016 |
| 1  | -1.39827592 | 0.55681187  | 1.08007837  |
| 6  | -2.45564019 | 3.36641281  | 0.71924590  |
| 1  | -2.42782488 | 4.42285765  | 1.03814174  |
| 1  | -2.67940864 | 3.37727595  | -0.36222006 |
| 6  | -3.57958370 | 2.64509382  | 1.46781476  |
| 1  | -3.38373767 | 2.62745399  | 2.55080112  |
| 1  | -3.68384024 | 1.60439363  | 1.13038094  |
| 1  | -4.54619461 | 3.14476172  | 1.31191937  |
| 17 | 1.91033897  | -0.06761399 | 2.19721598  |
| 17 | 4.20891574  | 1.96140401  | 2.05930688  |
| 5  | 2.55580174  | 1.60884675  | 2.54745560  |
| 17 | 1.80339013  | 2.46310167  | 3.89437242  |

### TS(5b-6b)

$\nu = 118.15i \text{ cm}^{-1}$

|    |             |             |             |
|----|-------------|-------------|-------------|
| 6  | 0.63308415  | 2.36319548  | 1.30673952  |
| 13 | 0.18241887  | 0.95952651  | -0.01700882 |
| 6  | -1.72836550 | 1.56149811  | -0.30895008 |
| 6  | -1.59899102 | 3.01530682  | 0.25014869  |
| 6  | -0.75532541 | 3.00614676  | 1.55027801  |
| 6  | 1.29382456  | -0.08749514 | -1.27675974 |
| 6  | 2.64860501  | -0.57037086 | -0.72047078 |
| 1  | -0.66373925 | 4.02810861  | 1.95019160  |
| 1  | 1.10059636  | 2.02014086  | 2.24100093  |
| 1  | 1.32555382  | 3.10364850  | 0.87050239  |
| 1  | -1.02446604 | 3.60298816  | -0.49445991 |
| 1  | -1.30646202 | 2.42409438  | 2.31038967  |
| 1  | 0.70336518  | -0.94579843 | -1.63997496 |
| 1  | 1.46246990  | 0.54188548  | -2.16935158 |
| 1  | 3.23426261  | -1.12012583 | -1.47374393 |
| 1  | 3.26853029  | 0.27086674  | -0.37633535 |
| 1  | 2.51811324  | -1.24316198 | 0.14046328  |
| 1  | -2.64530026 | 1.12791306  | 0.12781951  |
| 1  | -1.93816384 | 1.56002328  | -1.39187902 |
| 6  | -2.97144496 | 3.69297805  | 0.41062102  |

|   |             |             |             |
|---|-------------|-------------|-------------|
| 1 | -3.53768495 | 3.55311336  | -0.52477085 |
| 1 | -3.53583124 | 3.15380029  | 1.19164873  |
| 6 | -2.92463555 | 5.18824886  | 0.74543137  |
| 1 | -2.35056247 | 5.74462164  | -0.01124448 |
| 1 | -2.46060398 | 5.37796195  | 1.72288168  |
| 1 | -3.93728572 | 5.61513897  | 0.77288054  |
| 9 | -0.50460413 | -0.72768989 | 1.27311270  |
| 5 | -1.86521939 | -0.69857168 | 1.06103793  |
| 9 | -2.35345730 | -1.42478974 | 0.06610060  |
| 9 | -2.62736696 | -0.28233480 | 2.06335878  |

**TS(5b'-6b')**

$\nu = 147.01i \text{ cm}^{-1}$

|    |             |             |             |
|----|-------------|-------------|-------------|
| 6  | 0.60242801  | 2.99317088  | -0.87489096 |
| 13 | 0.13638765  | 1.12248140  | -1.35470924 |
| 6  | -1.79928264 | 1.21541722  | -0.70062247 |
| 6  | -1.56582333 | 2.38405408  | 0.31096360  |
| 6  | -0.75959842 | 3.51904372  | -0.36537917 |
| 6  | 1.20034866  | -0.54409014 | -1.18424397 |
| 6  | 1.49554039  | -0.92956663 | 0.28067335  |
| 1  | -1.35225762 | 3.90356932  | -1.21306075 |
| 1  | 1.34635706  | 2.99611307  | -0.06008561 |
| 1  | -0.93382042 | 1.99489818  | 1.13584658  |
| 1  | 1.01842592  | 3.61509477  | -1.67963672 |
| 1  | -2.72054062 | 1.43266255  | -1.25243555 |
| 1  | -0.64423942 | 4.35857851  | 0.34088879  |
| 1  | 0.67074377  | -1.36837676 | -1.68959919 |
| 1  | 2.14881573  | -0.41372689 | -1.73273833 |
| 1  | 2.09571275  | -1.85021468 | 0.35380135  |
| 1  | 2.05373470  | -0.14015314 | 0.80686206  |
| 1  | 0.57068028  | -1.10491771 | 0.85163598  |
| 1  | -1.97351542 | 0.24464862  | -0.20814101 |
| 6  | -2.87446650 | 2.89781091  | 0.93697478  |
| 1  | -2.63629122 | 3.76404945  | 1.57741058  |
| 1  | -3.51918315 | 3.28050414  | 0.12701041  |
| 6  | -3.63999977 | 1.85817916  | 1.75984560  |
| 1  | -3.01630976 | 1.46355306  | 2.57645538  |
| 1  | -3.95953423 | 1.00743705  | 1.14196534  |
| 1  | -4.54033609 | 2.29755168  | 2.21184816  |
| 17 | -0.17319124 | 1.14093274  | -3.87838220 |
| 17 | -2.45311322 | -0.80772777 | -3.22093002 |
| 5  | -1.91119171 | 0.86012792  | -3.37475602 |
| 17 | -3.04474590 | 2.15368518  | -3.76741865 |

**TS(6a-7a)**

$\nu = 124.17i \text{ cm}^{-1}$

|    |             |            |             |
|----|-------------|------------|-------------|
| 6  | -2.72739051 | 1.96108872 | -0.01726373 |
| 13 | 0.38174703  | 0.59943404 | -0.33404869 |
| 6  | -0.71141636 | 1.24015715 | -1.92017788 |
| 6  | -1.29784842 | 2.66556829 | -1.98343247 |

|   |             |             |             |
|---|-------------|-------------|-------------|
| 6 | -2.71567127 | 2.66478421  | -1.38944768 |
| 6 | 1.51431168  | -1.00074865 | -0.47321365 |
| 6 | 2.88434263  | -0.76247454 | -1.14288440 |
| 1 | -3.09989686 | 3.68958303  | -1.28981278 |
| 1 | -3.75369133 | 1.92691054  | 0.38570167  |
| 1 | -2.10957453 | 2.52231212  | 0.70020607  |
| 1 | -0.67002459 | 3.31959075  | -1.35052006 |
| 1 | -3.39492279 | 2.13540056  | -2.08055806 |
| 1 | 1.66449602  | -1.39471469 | 0.54640568  |
| 1 | 0.96070882  | -1.78519056 | -1.01631712 |
| 1 | 3.49127425  | -1.68040883 | -1.17441955 |
| 1 | 2.77842225  | -0.41420963 | -2.18185983 |
| 1 | 3.47066646  | -0.00252670 | -0.60612279 |
| 1 | -1.33009310 | 0.53076458  | -2.49353342 |
| 1 | 0.23898783  | 1.24458431  | -2.50639429 |
| 6 | -1.26624015 | 3.23140784  | -3.41671772 |
| 1 | -0.23342531 | 3.15716264  | -3.79522813 |
| 1 | -1.87746495 | 2.58191752  | -4.06737490 |
| 6 | -1.73675987 | 4.68443915  | -3.54650681 |
| 1 | -1.16338897 | 5.34678517  | -2.88034076 |
| 1 | -2.80088216 | 4.79748817  | -3.29721416 |
| 1 | -1.60079528 | 5.04876335  | -4.57438176 |
| 9 | -1.20159150 | -0.00435823 | 0.74010732  |
| 5 | -2.19387788 | 0.50368181  | -0.16845679 |
| 9 | 0.91746889  | 1.92516563  | 0.57540821  |
| 9 | -2.84994763 | -0.48625986 | -0.78186408 |

**TS(6a-7a) + THF**

$\nu = 207.78i \text{ cm}^{-1}$

|    |             |             |             |
|----|-------------|-------------|-------------|
| 6  | 1.31392999  | 3.71914804  | 1.87147082  |
| 13 | 1.30211989  | 0.53322275  | -0.55948770 |
| 6  | 0.14772590  | 2.19871786  | -0.01324523 |
| 6  | -0.87352629 | 2.71150211  | 1.02551758  |
| 6  | -0.22284448 | 3.79848422  | 1.92331131  |
| 6  | 2.06804568  | 0.99872014  | -2.33337130 |
| 6  | 3.20208153  | 0.10221214  | -2.86168860 |
| 1  | -0.55320896 | 4.79451186  | 1.58823374  |
| 1  | 1.76163544  | 4.08143387  | 2.81193524  |
| 1  | -1.16551208 | 1.86189640  | 1.66580749  |
| 1  | 1.71372308  | 4.36123393  | 1.07336360  |
| 1  | 0.64985380  | 3.04370388  | -0.50963481 |
| 1  | -0.58241357 | 3.68420080  | 2.95568770  |
| 1  | 1.24531712  | 1.04467440  | -3.07024814 |
| 1  | 2.43190146  | 2.03686947  | -2.25291604 |
| 1  | 3.59770160  | 0.46011575  | -3.82556853 |
| 1  | 4.04188596  | 0.06146630  | -2.15374959 |
| 1  | 2.87249716  | -0.93698817 | -3.01065032 |
| 1  | -0.46148550 | 1.74594617  | -0.82690474 |
| 6  | -2.15952000 | 3.27405259  | 0.38430486  |
| 1  | -2.73359272 | 3.78567938  | 1.17542942  |



|    |             |             |             |
|----|-------------|-------------|-------------|
| 1  | -1.87680719 | 4.05770088  | -0.33977322 |
| 6  | -3.07188093 | 2.24856431  | -0.29290135 |
| 1  | -3.41236033 | 1.48879327  | 0.42731688  |
| 1  | -2.56857566 | 1.72924373  | -1.12278490 |
| 1  | -3.96651614 | 2.73242301  | -0.70964730 |
| 17 | 2.14318827  | -1.25050434 | 0.39865963  |
| 17 | 3.38114987  | 1.93975613  | 0.80911904  |
| 5  | 1.77809151  | 2.23543286  | 1.64617165  |
| 17 | 1.32666139  | 1.02478604  | 2.91315395  |
| 6  | -1.35944067 | -2.60594225 | -0.34654982 |
| 6  | -1.32497990 | -2.57770683 | -1.88216415 |
| 6  | -1.19900446 | -1.13593797 | 0.01495088  |
| 6  | -0.24145152 | -1.54631222 | -2.15657267 |
| 1  | -0.51337748 | -3.18594548 | 0.04553752  |
| 1  | -2.15561356 | -0.59665182 | 0.02428897  |
| 1  | -2.29117367 | -2.24699074 | -2.29001586 |
| 1  | -0.34712236 | -1.00975166 | -3.10640321 |
| 1  | -1.07578595 | -3.55151680 | -2.32185492 |
| 1  | 0.76550511  | -1.97992942 | -2.07374097 |
| 1  | -0.65701790 | -0.96998145 | 0.95399099  |
| 1  | -2.29208203 | -3.02246509 | 0.05398586  |
| 8  | -0.39096593 | -0.54600105 | -1.08122351 |

**TS(6a-7a) + 2THF**

$\nu = 211.67i \text{ cm}^{-1}$

|    |             |             |             |
|----|-------------|-------------|-------------|
| 6  | 1.66419053  | 4.00697245  | -1.52820474 |
| 13 | 1.28271069  | 0.10884603  | -0.67998894 |
| 6  | 0.19575048  | 1.76152709  | -1.37578096 |
| 6  | -0.60370801 | 3.00181537  | -0.92021438 |
| 6  | 0.17270020  | 4.29785376  | -1.28034449 |
| 6  | 1.61038983  | -1.00590672 | -2.29266733 |
| 6  | 2.64691764  | -2.13598524 | -2.16225064 |
| 1  | -0.27058013 | 4.75050956  | -2.18149261 |
| 1  | 2.29077868  | 4.88098030  | -1.27900049 |
| 1  | -0.71170208 | 2.95430967  | 0.17679996  |
| 1  | 1.84790196  | 3.78707171  | -2.59009981 |
| 1  | 0.53713105  | 1.88433767  | -2.41534014 |
| 1  | 0.64358154  | -1.41468829 | -2.63920028 |
| 1  | 1.92515867  | -0.31299304 | -3.09110098 |
| 1  | 2.79887282  | -2.67055492 | -3.11353542 |
| 1  | 3.62370290  | -1.74682290 | -1.84183973 |
| 1  | 2.35085036  | -2.88413736 | -1.41166652 |
| 1  | -0.55074755 | 0.93911567  | -1.44443992 |
| 17 | 2.39519915  | -0.47527246 | 1.11920418  |
| 17 | 3.53056712  | 1.76514446  | -1.23965508 |
| 5  | 2.13316975  | 2.79873245  | -0.64632974 |
| 17 | 2.02910988  | 2.99030541  | 1.15453290  |
| 6  | -1.11887947 | -1.44551758 | 2.29661594  |
| 6  | -1.42093290 | -2.56933858 | 1.29359535  |
| 6  | -0.94859651 | -0.23186475 | 1.39320333  |

|   |             |             |             |
|---|-------------|-------------|-------------|
| 6 | -0.47126272 | -2.23946736 | 0.15242385  |
| 1 | -0.18278541 | -1.65170039 | 2.83259955  |
| 1 | -1.90233643 | 0.26284938  | 1.16596085  |
| 1 | -2.46674913 | -2.52385504 | 0.95682701  |
| 1 | -0.80430206 | -2.57773734 | -0.83546286 |
| 1 | -1.22921360 | -3.56936368 | 1.70224515  |
| 1 | 0.54877944  | -2.59723040 | 0.35381378  |
| 1 | -0.21977466 | 0.49695714  | 1.76825240  |
| 1 | -1.92225590 | -1.29659281 | 3.02882672  |
| 8 | -0.43172426 | -0.76498168 | 0.10859594  |
| 6 | 6.19466856  | 6.60550290  | 0.70621966  |
| 6 | 5.16385406  | 7.36961698  | 1.58236873  |
| 6 | 5.31026881  | 5.73558545  | -0.20388413 |
| 6 | 3.80235964  | 6.90890836  | 1.02116548  |
| 1 | 6.88737681  | 5.99681511  | 1.30211871  |
| 1 | 5.70451824  | 5.59919690  | -1.21858278 |
| 1 | 5.28852051  | 8.45450008  | 1.47317430  |
| 1 | 3.05313915  | 7.70765228  | 0.95032866  |
| 1 | 5.25965336  | 7.12618847  | 2.64873780  |
| 1 | 3.38780640  | 6.08180479  | 1.62790178  |
| 1 | 5.13817512  | 4.74179436  | 0.25137281  |
| 1 | 6.78994434  | 7.30763291  | 0.10826383  |
| 8 | 4.06557603  | 6.44423102  | -0.31233391 |
| 1 | 0.04952025  | 5.03359782  | -0.47288931 |
| 6 | -2.02260678 | 3.06211570  | -1.52375760 |
| 1 | -2.43902359 | 4.05980631  | -1.30381218 |
| 1 | -1.93935129 | 3.00432218  | -2.62285959 |
| 6 | -3.00743391 | 2.00256772  | -1.02309916 |
| 1 | -3.14900698 | 2.08064327  | 0.06588919  |
| 1 | -2.66768922 | 0.98017535  | -1.24915118 |
| 1 | -3.99304900 | 2.12707737  | -1.49359406 |

**TS(6a'-7a')**

$\nu = 188.65i \text{ cm}^{-1}$

|    |             |             |             |
|----|-------------|-------------|-------------|
| 6  | 1.41121941  | 3.50085951  | 1.41474234  |
| 13 | 0.69618449  | 0.18571648  | -0.07432506 |
| 6  | -0.30521335 | 1.31486787  | 1.31274193  |
| 6  | -0.91780239 | 2.68567058  | 0.95558886  |
| 6  | 0.20055042  | 3.63073305  | 0.48100667  |
| 6  | 0.15975426  | 0.20509107  | -1.97651015 |
| 6  | 1.04761077  | -0.65614422 | -2.89534639 |
| 1  | 0.49322890  | 3.35794725  | -0.54798750 |
| 1  | 1.14105445  | 3.82810895  | 2.43144868  |
| 1  | -1.33840432 | 3.11974649  | 1.88211294  |
| 1  | 2.23184513  | 4.15923918  | 1.07998006  |
| 1  | -1.08484291 | 0.51910831  | 1.25368069  |
| 1  | -0.15937975 | 4.67032946  | 0.44297016  |
| 1  | -0.88256495 | -0.15707692 | -2.02199970 |
| 1  | 0.13195874  | 1.24540609  | -2.34063924 |
| 1  | 0.68409686  | -0.64951771 | -3.93443871 |

|    |             |             |             |
|----|-------------|-------------|-------------|
| 1  | 2.08655650  | -0.29415851 | -2.91407103 |
| 1  | 1.07720136  | -1.70286823 | -2.56151044 |
| 1  | -0.03273090 | 1.24935197  | 2.37365323  |
| 6  | -2.06355398 | 2.61734678  | -0.06988609 |
| 1  | -2.29464295 | 3.64618071  | -0.39243524 |
| 1  | -1.71494982 | 2.08887402  | -0.97276672 |
| 6  | -3.34659193 | 1.96460317  | 0.45306151  |
| 1  | -3.73256479 | 2.50252173  | 1.33182029  |
| 1  | -3.18828220 | 0.91708613  | 0.74924051  |
| 1  | -4.13307805 | 1.96965228  | -0.31422640 |
| 17 | 1.15794209  | -1.72982283 | 0.78722236  |
| 17 | 2.80579958  | 1.38569769  | -0.09202635 |
| 5  | 1.96917764  | 2.03760003  | 1.47954508  |
| 17 | 2.62391416  | 1.28825635  | 2.94822920  |

### TS(6b-7b)

$\nu = 157.44i \text{ cm}^{-1}$

|    |             |             |             |
|----|-------------|-------------|-------------|
| 6  | 0.48190032  | 2.19499953  | 1.37766596  |
| 13 | 0.27594751  | 0.88615627  | -0.15728216 |
| 6  | -0.01578556 | 4.49200888  | -0.20914075 |
| 6  | 0.09561649  | 4.72777993  | 1.33017745  |
| 6  | -0.16512304 | 3.40435418  | 2.08295876  |
| 6  | 1.94600328  | 0.18351700  | -0.92318268 |
| 6  | 1.75880557  | -0.82826463 | -2.07202403 |
| 1  | 0.22960379  | 3.48562184  | 3.10694338  |
| 1  | 0.40273853  | 1.34018255  | 2.08637271  |
| 1  | 1.56719239  | 2.39165091  | 1.28055571  |
| 1  | 1.13519704  | 5.03161784  | 1.54352015  |
| 1  | -1.25043879 | 3.24158876  | 2.18242219  |
| 1  | 2.56304674  | 1.03357227  | -1.26194755 |
| 1  | 2.52343453  | -0.28488517 | -0.10680603 |
| 1  | 2.72231893  | -1.20718679 | -2.44652055 |
| 1  | 1.16494551  | -1.69573339 | -1.75109998 |
| 1  | 1.23148711  | -0.37978383 | -2.92698745 |
| 1  | -0.53611798 | 5.33892357  | -0.68719416 |
| 1  | 0.97828277  | 4.43283038  | -0.67326808 |
| 6  | -0.82847202 | 5.86274133  | 1.80281752  |
| 1  | -0.59766814 | 6.76651308  | 1.21525301  |
| 1  | -1.87161427 | 5.59560811  | 1.56146299  |
| 6  | -0.71386943 | 6.19331622  | 3.29435151  |
| 1  | 0.32372081  | 6.43950261  | 3.56705716  |
| 1  | -1.03664610 | 5.35499497  | 3.92687974  |
| 1  | -1.34010556 | 7.05891761  | 3.55134168  |
| 9  | -1.06019853 | -0.14231968 | -0.03753541 |
| 5  | -0.80425151 | 3.17688952  | -0.47818877 |
| 9  | -0.39050161 | 2.24424228  | -1.48996796 |
| 9  | -2.08274783 | 2.98651330  | -0.14040250 |

### TS(6b-7b) + THF

$\nu = 218.47i \text{ cm}^{-1}$

|    |             |             |             |
|----|-------------|-------------|-------------|
| 6  | 1.43284438  | 3.52964630  | 2.04904074  |
| 13 | 1.37399328  | 0.47176702  | -0.60070265 |
| 6  | 0.22630467  | 2.06742248  | 0.11585722  |
| 6  | -0.71624720 | 2.47713678  | 1.26159206  |
| 6  | -0.11870423 | 3.65641612  | 2.05726441  |
| 6  | 2.05021114  | 1.04187283  | -2.37908339 |
| 6  | 3.15205753  | 0.17295492  | -3.01170957 |
| 1  | -0.37692529 | 4.58157399  | 1.51272220  |
| 1  | 1.85063629  | 3.76830487  | 3.04123195  |
| 1  | -0.88648936 | 1.62413113  | 1.93787989  |
| 1  | 1.87802165  | 4.25361418  | 1.35211832  |
| 1  | 0.67244363  | 2.95820356  | -0.35288191 |
| 1  | 1.18875616  | 1.12435502  | -3.06693538 |
| 1  | 2.42026179  | 2.07427774  | -2.26339564 |
| 1  | 3.49530491  | 0.57769799  | -3.97714141 |
| 1  | 4.02929170  | 0.09874348  | -2.35357433 |
| 1  | 2.81258005  | -0.85801037 | -3.19235426 |
| 1  | -0.42730404 | 1.66172612  | -0.68775420 |
| 1  | -1.70437914 | 2.76673788  | 0.86811693  |
| 17 | 2.24539305  | -1.35722667 | 0.22809814  |
| 17 | 3.47763312  | 1.87365068  | 0.74153079  |
| 5  | 1.91162482  | 2.07387586  | 1.67884495  |
| 17 | 1.57855324  | 0.76085716  | 2.88386596  |
| 6  | -1.42755717 | -2.57713545 | -0.40157259 |
| 6  | -1.39056190 | -2.53805115 | -1.93720311 |
| 6  | -1.16379100 | -1.12535151 | -0.02278941 |
| 6  | -0.24336272 | -1.57554769 | -2.20213429 |
| 1  | -0.62404370 | -3.21893344 | -0.01604162 |
| 1  | -2.08171637 | -0.52237084 | 0.01664613  |
| 1  | -2.33316440 | -2.14255870 | -2.34263277 |
| 1  | -0.31008581 | -1.02978818 | -3.15029408 |
| 1  | -1.20456333 | -3.52249826 | -2.38437275 |
| 1  | 0.73536173  | -2.06900028 | -2.11371303 |
| 1  | -0.59478157 | -1.01197030 | 0.90848342  |
| 1  | -2.38597494 | -2.93292057 | -0.00369625 |
| 8  | -0.34210189 | -0.57212935 | -1.12610276 |
| 6  | -0.73908600 | 3.76179588  | 3.45923518  |
| 1  | -1.83336487 | 3.65298534  | 3.36467057  |
| 1  | -0.39596159 | 2.90765765  | 4.06551461  |
| 6  | -0.43074085 | 5.07534107  | 4.18324618  |
| 1  | -0.81044118 | 5.93821383  | 3.61535237  |
| 1  | 0.65069476  | 5.21921672  | 4.32176024  |
| 1  | -0.89590958 | 5.09896486  | 5.17872867  |

**TS(6b-7b) + 2THF**

$\nu = 220.64i \text{ cm}^{-1}$

|    |             |             |             |
|----|-------------|-------------|-------------|
| 6  | 1.91152651  | 3.96293556  | -1.44218726 |
| 13 | 1.40509182  | -0.01715191 | -0.98028462 |
| 6  | 0.53757377  | 1.67142959  | -1.85933681 |
| 6  | -0.36234851 | 2.88341944  | -1.55738277 |

|    |             |             |             |
|----|-------------|-------------|-------------|
| 6  | 0.41055425  | 4.20209486  | -1.77541129 |
| 6  | 2.24640149  | -1.03423363 | -2.46486491 |
| 6  | 3.19694673  | -2.17817593 | -2.06876419 |
| 1  | 0.34624530  | 4.44515364  | -2.85056105 |
| 1  | 2.34246864  | 4.82087623  | -0.89816796 |
| 1  | -0.72605957 | 2.83619327  | -0.51828346 |
| 1  | 2.49997193  | 3.86552061  | -2.36583106 |
| 1  | 1.15954847  | 1.86530865  | -2.74677348 |
| 1  | 1.44364199  | -1.41697490 | -3.12144910 |
| 1  | 2.79298723  | -0.30222272 | -3.08260365 |
| 1  | 3.64724485  | -2.66590369 | -2.94806763 |
| 1  | 4.01845376  | -1.81358102 | -1.43592979 |
| 1  | 2.68356043  | -2.95999923 | -1.48912483 |
| 1  | -0.14497940 | 0.86184107  | -2.20097763 |
| 1  | -1.25664126 | 2.87191351  | -2.20183593 |
| 17 | 1.89163146  | -0.69384236 | 1.04602345  |
| 17 | 3.66809951  | 1.70904028  | -0.75712428 |
| 5  | 2.12297439  | 2.68651274  | -0.54940798 |
| 17 | 1.49900207  | 2.74254264  | 1.15675174  |
| 6  | -1.81258163 | -2.74148552 | -0.12106826 |
| 6  | -1.91770194 | -1.61496784 | 0.91862984  |
| 6  | -0.49736247 | -2.41412863 | -0.81100227 |
| 6  | -1.40512733 | -0.40247776 | 0.15188130  |
| 1  | -2.64869659 | -2.69669429 | -0.83396133 |
| 1  | 0.36888823  | -2.76391331 | -0.23093037 |
| 1  | -1.26283960 | -1.82323915 | 1.77535153  |
| 1  | -0.86317759 | 0.31591563  | 0.77974320  |
| 1  | -2.94055694 | -1.46169107 | 1.28433385  |
| 1  | -2.19631500 | 0.10899691  | -0.41392343 |
| 1  | -0.42421626 | -2.75843981 | -1.84902102 |
| 1  | -1.79456792 | -3.74023427 | 0.33269720  |
| 8  | -0.45159987 | -0.94106482 | -0.84724643 |
| 6  | 4.50258061  | 5.36056645  | 2.51032031  |
| 6  | 5.60531165  | 5.33415706  | 1.41731801  |
| 6  | 3.43733879  | 6.31669031  | 1.93193817  |
| 6  | 5.12461907  | 6.38513596  | 0.40493721  |
| 1  | 4.88152430  | 5.72714400  | 3.47346202  |
| 1  | 2.40635786  | 5.96323740  | 2.05911905  |
| 1  | 5.65757174  | 4.34423531  | 0.94639387  |
| 1  | 5.37209431  | 6.15238547  | -0.63864424 |
| 1  | 6.60102855  | 5.57317072  | 1.81375344  |
| 1  | 5.52876709  | 7.38655726  | 0.65310306  |
| 1  | 3.52802279  | 7.32455908  | 2.38076137  |
| 1  | 4.08860943  | 4.35782359  | 2.67136806  |
| 8  | 3.69436568  | 6.39694804  | 0.51993522  |
| 6  | -0.23437317 | 5.36617576  | -1.00688206 |
| 1  | -1.32290468 | 5.34107990  | -1.18997944 |
| 1  | -0.09999683 | 5.19628230  | 0.07405726  |
| 6  | 0.30871634  | 6.74649123  | -1.38769299 |
| 1  | 0.16487669  | 6.94510321  | -2.46091566 |

|   |             |            |             |
|---|-------------|------------|-------------|
| 1 | 1.38242497  | 6.83363453 | -1.16856550 |
| 1 | -0.20705738 | 7.54098381 | -0.82973494 |

**TS(6b'-7b')**

$\nu = 159.73i \text{ cm}^{-1}$

|    |             |             |             |
|----|-------------|-------------|-------------|
| 6  | 0.11179076  | 2.09654572  | -0.83790251 |
| 13 | 0.58959324  | 0.77044462  | -2.30296336 |
| 6  | -2.37574089 | 0.98574782  | -0.08748394 |
| 6  | -2.04813672 | 2.39866864  | 0.48920524  |
| 6  | -0.95949502 | 3.08137742  | -0.36260198 |
| 6  | 2.06863825  | -0.43927864 | -1.79747801 |
| 6  | 1.99174083  | -1.12945165 | -0.42498834 |
| 1  | -1.41635586 | 3.58614577  | -1.22739187 |
| 1  | 0.50918754  | 1.53770917  | 0.02897723  |
| 1  | -1.62658641 | 2.23948229  | 1.49706079  |
| 1  | 0.96284283  | 2.70357544  | -1.22487693 |
| 1  | -3.45170880 | 0.76745689  | 0.02870156  |
| 1  | -0.49146360 | 3.87528158  | 0.24273652  |
| 1  | 2.14595111  | -1.19162820 | -2.60034620 |
| 1  | 2.99589167  | 0.15573791  | -1.87296157 |
| 1  | 2.85032866  | -1.79717775 | -0.25384060 |
| 1  | 1.98416937  | -0.40130565 | 0.40013918  |
| 1  | 1.08285433  | -1.74135993 | -0.32459619 |
| 1  | -1.84790788 | 0.20624639  | 0.47950431  |
| 6  | -3.27979297 | 3.30604495  | 0.64448646  |
| 1  | -2.92771405 | 4.32717696  | 0.86759060  |
| 1  | -3.80541992 | 3.36959091  | -0.32222032 |
| 6  | -4.25233286 | 2.86560923  | 1.74219710  |
| 1  | -3.75694856 | 2.84580410  | 2.72450236  |
| 1  | -4.65736083 | 1.86025263  | 1.55453871  |
| 1  | -5.10631724 | 3.55344061  | 1.81233961  |
| 17 | 0.65346395  | 1.56324509  | -4.29754336 |
| 17 | -1.34554140 | -0.76276675 | -2.25358010 |
| 5  | -2.01922395 | 0.85932689  | -1.59923346 |
| 17 | -2.75667129 | 1.85284739  | -2.86681882 |

**TS(10a-11a)**

$\nu = 109.80i \text{ cm}^{-1}$

|    |             |             |             |
|----|-------------|-------------|-------------|
| 6  | -1.28777300 | -5.81764799 | -6.18341372 |
| 13 | -0.81072965 | -2.45981794 | -7.84559126 |
| 6  | -1.77512157 | -2.46663391 | -6.09702964 |
| 6  | -0.68313614 | -3.39148166 | -5.41497607 |
| 6  | -1.24354609 | -4.78258017 | -5.04094283 |
| 6  | 0.88535939  | -1.56226030 | -8.27472576 |
| 6  | 2.09670058  | -2.48869917 | -8.50756622 |
| 1  | -0.61211238 | -5.19728190 | -4.24015398 |
| 1  | -1.43597969 | -6.81967521 | -5.73604956 |
| 1  | -0.30414482 | -5.88863596 | -6.67645133 |
| 1  | 0.17771385  | -3.59559929 | -6.10163853 |
| 1  | -2.24607049 | -4.64898294 | -4.60464130 |

|   |             |             |             |
|---|-------------|-------------|-------------|
| 1 | 0.70443758  | -0.96015980 | -9.18228888 |
| 1 | 1.11182937  | -0.82893396 | -7.48254821 |
| 1 | 2.99061221  | -1.92174255 | -8.80914964 |
| 1 | 2.36287177  | -3.05062493 | -7.59978790 |
| 1 | 1.89478710  | -3.22813378 | -9.29536124 |
| 1 | -2.72548768 | -3.01021697 | -6.15103830 |
| 1 | -1.92145345 | -1.60163374 | -5.43845201 |
| 6 | -0.05893314 | -2.65456137 | -4.21175608 |
| 1 | 0.15431438  | -1.61758114 | -4.51709360 |
| 1 | -0.82327069 | -2.58777008 | -3.41880018 |
| 6 | 1.22532304  | -3.27948181 | -3.65974467 |
| 1 | 2.00635064  | -3.32723243 | -4.43346139 |
| 1 | 1.06578809  | -4.29880706 | -3.28177580 |
| 1 | 1.61971779  | -2.68093027 | -2.82716508 |
| 9 | -2.33990935 | -6.55869988 | -8.35531895 |
| 5 | -2.39209907 | -5.73729931 | -7.30020840 |
| 9 | -1.20018650 | -3.90308537 | -8.66003514 |
| 9 | -3.52226436 | -5.02265056 | -7.16246064 |
| 9 | -2.23674433 | -1.13631524 | -8.72065875 |
| 9 | -4.04643293 | -1.11503287 | -7.26120767 |
| 5 | -2.81452371 | -0.71317733 | -7.52298798 |
| 9 | -2.30366563 | 0.38489712  | -6.97619112 |

### TS(10a'-11a')

$\nu = 167.34i \text{ cm}^{-1}$

|    |             |             |             |
|----|-------------|-------------|-------------|
| 6  | 0.69836978  | 4.00620212  | 0.44759579  |
| 13 | -0.90985552 | -0.06453880 | -1.40264985 |
| 6  | -2.06675996 | 1.58733424  | -1.08387655 |
| 6  | -1.18893316 | 2.20308661  | 0.06811364  |
| 6  | -0.28481806 | 3.30073333  | -0.52924305 |
| 6  | 1.02738135  | -0.04218872 | -1.77345614 |
| 6  | 1.58886820  | -1.39660114 | -2.24880495 |
| 1  | 0.28873578  | 2.87981175  | -1.36924344 |
| 1  | 0.13672974  | 4.47152398  | 1.26969997  |
| 1  | -0.53844896 | 1.43431950  | 0.53871923  |
| 1  | 1.17791770  | 4.82177657  | -0.11737879 |
| 1  | -2.37204295 | 2.43817831  | -1.70043312 |
| 1  | -0.93888901 | 4.07375207  | -0.96576825 |
| 1  | 1.25517409  | 0.74421909  | -2.51084953 |
| 1  | 1.53918764  | 0.25662000  | -0.84376310 |
| 1  | 2.68029363  | -1.35330635 | -2.38309488 |
| 1  | 1.37683827  | -2.19876481 | -1.52749866 |
| 1  | 1.15703911  | -1.70233114 | -3.21323777 |
| 1  | -2.98901390 | 1.14385993  | -0.68228906 |
| 6  | -2.10727659 | 2.73295642  | 1.19187568  |
| 1  | -1.49965229 | 3.33610561  | 1.88435420  |
| 1  | -2.84239197 | 3.42109472  | 0.74082040  |
| 6  | -2.82125003 | 1.64994818  | 2.00526994  |
| 1  | -2.09714174 | 0.97626719  | 2.48512428  |
| 1  | -3.48849998 | 1.03131600  | 1.39003452  |

|    |             |             |             |
|----|-------------|-------------|-------------|
| 1  | -3.43130216 | 2.10636830  | 2.79678232  |
| 17 | -1.65182650 | -1.60923340 | -0.10138243 |
| 17 | 3.26823325  | 2.71576867  | 0.05565610  |
| 5  | 1.83103603  | 3.08920027  | 1.01890359  |
| 17 | 1.73778065  | 2.37420681  | 2.63534790  |
| 17 | -4.12297799 | 1.25967850  | -3.40808003 |
| 17 | -1.31414807 | 2.17988909  | -4.26806847 |
| 5  | -2.37312680 | 1.01674432  | -3.44788808 |
| 17 | -1.84070003 | -0.75919748 | -3.57765708 |

**TS(10b-11b)**

$\nu = 184.48i \text{ cm}^{-1}$

|    |             |             |             |
|----|-------------|-------------|-------------|
| 6  | 0.65806262  | 2.18840595  | 1.70670419  |
| 13 | 0.94046765  | 0.43232762  | 0.75274475  |
| 6  | -1.62805297 | 2.33759523  | -0.47781257 |
| 6  | -1.53817494 | 3.22936949  | 0.78087376  |
| 6  | -0.83464069 | 2.53823155  | 1.96696534  |
| 6  | 2.43945440  | 0.07124064  | -0.46149589 |
| 6  | 3.78901258  | 0.69742591  | -0.05667320 |
| 1  | -0.89201274 | 3.20838310  | 2.83627986  |
| 1  | 1.27282460  | 2.57845443  | 2.53412776  |
| 1  | 1.05933742  | 2.81740190  | 0.88204491  |
| 1  | -0.92207625 | 4.10825800  | 0.50955027  |
| 1  | -1.40778209 | 1.63873986  | 2.24016032  |
| 1  | 2.53819563  | -1.02370580 | -0.55285028 |
| 1  | 2.15162702  | 0.41432057  | -1.47020395 |
| 1  | 4.58094522  | 0.46808361  | -0.78571015 |
| 1  | 3.72781327  | 1.79358243  | 0.01708956  |
| 1  | 4.13517528  | 0.32847488  | 0.92008234  |
| 1  | -2.08843125 | 2.92653210  | -1.29372890 |
| 1  | -0.62333966 | 2.11233252  | -0.88177743 |
| 6  | -2.92932523 | 3.76972376  | 1.17768808  |
| 1  | -3.44703355 | 4.09360619  | 0.25945932  |
| 1  | -3.53428304 | 2.95116783  | 1.59746095  |
| 6  | -2.89737642 | 4.94673291  | 2.15859672  |
| 1  | -2.29531845 | 5.77825832  | 1.76168235  |
| 1  | -2.47768090 | 4.66423268  | 3.13409999  |
| 1  | -3.91184676 | 5.32789023  | 2.34066187  |
| 9  | -0.53755462 | -0.37162367 | 0.50805191  |
| 5  | -2.43969858 | 0.98371731  | -0.42821020 |
| 9  | -2.49079331 | 0.20922102  | -1.52168867 |
| 9  | -3.24457001 | 0.63366716  | 0.58419379  |
| 9  | 1.50683961  | -0.49509224 | 2.52081168  |
| 9  | 0.46449815  | 0.74675437  | 4.18480456  |
| 5  | 1.50261003  | 0.61938120  | 3.37354607  |
| 9  | 2.69772964  | 1.12146308  | 3.66860083  |

**TS(10b'-11b')**

$\nu = 354.03i \text{ cm}^{-1}$

|   |            |            |            |
|---|------------|------------|------------|
| 6 | 0.57146578 | 2.60050671 | 1.69954241 |
|---|------------|------------|------------|



|    |             |             |             |
|----|-------------|-------------|-------------|
| 13 | 1.29471197  | 0.67959299  | 1.97978146  |
| 6  | -2.22311978 | 3.05553043  | -0.96799378 |
| 6  | -1.64142046 | 2.59225593  | 0.38216752  |
| 6  | -0.26090457 | 3.24904423  | 0.60283053  |
| 6  | 0.23528023  | -0.79055016 | 2.74645113  |
| 6  | -0.77404473 | -0.41259855 | 3.84522968  |
| 1  | 0.32036837  | 3.19790612  | -0.33029977 |
| 1  | 0.05893169  | 2.48007370  | 2.66483294  |
| 1  | -1.49288536 | 1.49874770  | 0.33461921  |
| 1  | 1.64113719  | 2.84743353  | 1.62704543  |
| 1  | -2.28504838 | 4.15675484  | -0.99891780 |
| 1  | -0.41160224 | 4.32312504  | 0.81187067  |
| 1  | -0.28310476 | -1.27717970 | 1.90145805  |
| 1  | 0.94678570  | -1.54671598 | 3.11759020  |
| 1  | -1.33531139 | -1.29020966 | 4.20013461  |
| 1  | -0.27787925 | 0.03008362  | 4.72070682  |
| 1  | -1.51697105 | 0.31747501  | 3.48960889  |
| 1  | -3.27710878 | 2.72272702  | -1.05438497 |
| 6  | -2.60139381 | 2.89412181  | 1.54909597  |
| 1  | -2.08367620 | 2.72179686  | 2.50708405  |
| 1  | -2.84693580 | 3.96953363  | 1.53566084  |
| 6  | -3.88919132 | 2.06508156  | 1.54600532  |
| 1  | -3.66791790 | 0.98753840  | 1.56929216  |
| 1  | -4.50646285 | 2.26010808  | 0.65750306  |
| 1  | -4.50496310 | 2.29798136  | 2.42534081  |
| 17 | 2.96920996  | 0.24108823  | 0.72333118  |
| 17 | -1.80079364 | 3.41004515  | -3.80832002 |
| 5  | -1.55990424 | 2.53887620  | -2.28791634 |
| 17 | -0.61674919 | 1.04243195  | -2.35654034 |
| 17 | 0.10369556  | 4.27480954  | 4.37898564  |
| 17 | 2.56894740  | 4.88608853  | 2.69988117  |
| 5  | 1.39074799  | 3.65982094  | 3.27951259  |
| 17 | 2.22879042  | 2.04045266  | 3.93145115  |

### TS(12-13a)

$\nu = 231.39i \text{ cm}^{-1}$

|   |             |            |             |
|---|-------------|------------|-------------|
| 6 | -0.35411775 | 3.94333273 | 0.09146280  |
| 6 | -2.64935113 | 2.71119992 | 0.05803605  |
| 6 | -2.47470758 | 3.65450934 | 1.29348430  |
| 6 | -0.95622425 | 3.83192307 | 1.50170667  |
| 1 | -0.72860010 | 4.70003308 | 2.13484354  |
| 1 | 0.73239439  | 3.77917193 | 0.05936947  |
| 1 | -0.53611182 | 4.94839454 | -0.32672797 |
| 1 | -2.87981332 | 4.63768604 | 0.99257678  |
| 1 | -0.55385848 | 2.94204015 | 2.01392573  |
| 1 | -3.36622657 | 1.91070049 | 0.31861578  |
| 1 | -3.21868856 | 3.17511154 | -0.76763459 |
| 6 | -3.25254847 | 3.19417266 | 2.53548372  |
| 1 | -4.30904468 | 3.04320293 | 2.25676778  |
| 1 | -2.87153050 | 2.21208200 | 2.85733120  |

|   |             |            |             |
|---|-------------|------------|-------------|
| 6 | -3.18328010 | 4.18348840 | 3.70303016  |
| 1 | -3.54695444 | 5.17829021 | 3.40393255  |
| 1 | -2.15666763 | 4.29996046 | 4.07691465  |
| 1 | -3.80294637 | 3.84052500 | 4.54293079  |
| 5 | -1.76960693 | 0.94497858 | -0.01514126 |
| 9 | -2.42943451 | 0.23301910 | -0.95300805 |
| 9 | -1.77306431 | 0.50417442 | 1.26368454  |
| 9 | -0.43510416 | 1.32706932 | -0.44205634 |
| 5 | -1.15863098 | 2.89695437 | -0.77773996 |
| 9 | -1.21003850 | 2.89484706 | -2.12690374 |

**TS(12'-13a')**

$\nu = 208.09i \text{ cm}^{-1}$

|    |             |            |             |
|----|-------------|------------|-------------|
| 6  | -1.01725013 | 3.84546365 | 1.84420229  |
| 6  | -1.29833944 | 3.56370268 | -0.71090136 |
| 6  | -2.04612406 | 2.41101603 | 0.06089491  |
| 6  | -2.16762128 | 2.85761460 | 1.53989900  |
| 1  | -3.14469846 | 3.33685338 | 1.70288212  |
| 1  | -1.36902153 | 4.88587671 | 1.80116314  |
| 1  | -1.43977559 | 1.49741854 | -0.00323420 |
| 1  | -0.58052977 | 3.69463174 | 2.84173608  |
| 1  | -1.88577199 | 4.47742012 | -0.55600357 |
| 1  | -2.12838791 | 1.97809461 | 2.19644842  |
| 1  | -1.43199388 | 3.25963740 | -1.76908230 |
| 6  | -3.41330954 | 2.12291846 | -0.57807528 |
| 1  | -3.95184911 | 1.45390475 | 0.11377457  |
| 1  | -4.00045188 | 3.05614660 | -0.61742825 |
| 6  | -3.36186732 | 1.47126046 | -1.96186871 |
| 1  | -2.78459031 | 0.53569003 | -1.93876761 |
| 1  | -2.90370282 | 2.12855322 | -2.71613583 |
| 1  | -4.37315568 | 1.23322088 | -2.31880558 |
| 17 | -0.32295907 | 5.73560746 | -2.28511675 |
| 5  | 0.16433488  | 4.23095573 | -1.38322209 |
| 17 | 1.21019524  | 3.09966362 | -2.31059431 |
| 17 | 0.97196816  | 1.99310244 | 0.85753450  |
| 17 | 1.25657359  | 4.96302360 | 0.24478013  |
| 5  | 0.05689176  | 3.54768621 | 0.72493551  |

**TS(12-13b)**

$\nu = 237.79i \text{ cm}^{-1}$

|   |             |            |             |
|---|-------------|------------|-------------|
| 6 | -0.36956958 | 3.95535067 | 0.07297891  |
| 6 | -2.64182698 | 2.75198353 | -0.01044304 |
| 6 | -2.46757842 | 3.56047224 | 1.29844435  |
| 6 | -0.95870491 | 3.85745320 | 1.49377087  |
| 1 | 0.72391158  | 3.84215824 | 0.04971068  |
| 1 | -0.59487271 | 4.94485104 | -0.36667432 |
| 1 | -3.02662977 | 4.50702499 | 1.21905831  |
| 1 | -0.50907670 | 2.97426608 | 1.98143165  |
| 1 | -3.46653874 | 2.02233834 | 0.05941400  |
| 1 | -3.04968769 | 3.37224991 | -0.83351396 |

|   |             |            |             |
|---|-------------|------------|-------------|
| 5 | -1.81606784 | 0.95576433 | 0.02781088  |
| 9 | -2.40211345 | 0.22034628 | -0.94044475 |
| 9 | -1.99589532 | 0.59548292 | 1.31807979  |
| 9 | -0.43934450 | 1.28012685 | -0.26584841 |
| 5 | -1.12460953 | 2.86681837 | -0.78192827 |
| 9 | -1.07695663 | 2.74873211 | -2.12317304 |
| 6 | -0.67593816 | 5.07794951 | 2.37656944  |
| 1 | 0.41142472  | 5.25815008 | 2.38976015  |
| 1 | -1.12835663 | 5.96774952 | 1.90430177  |
| 6 | -1.18351215 | 4.94174771 | 3.81602975  |
| 1 | -0.74479795 | 4.06041768 | 4.30728172  |
| 1 | -2.27705342 | 4.83491514 | 3.85409321  |
| 1 | -0.91742239 | 5.82419482 | 4.41429417  |
| 1 | -2.88561751 | 3.01316344 | 2.15225784  |

### TS(12'-13b')

$\nu = 196.83i \text{ cm}^{-1}$

|    |             |            |             |
|----|-------------|------------|-------------|
| 6  | -0.35081436 | 3.17912691 | 1.11612567  |
| 6  | -1.22557836 | 2.94105865 | -1.32672704 |
| 6  | -2.20560128 | 2.25932093 | -0.32662135 |
| 6  | -1.88111311 | 2.85002905 | 1.06430319  |
| 1  | -2.48064858 | 3.74533978 | 1.27058060  |
| 1  | -0.16926373 | 3.36852937 | 2.19228171  |
| 1  | -1.97245456 | 1.18172456 | -0.29548870 |
| 1  | 0.17509258  | 2.25528358 | 0.84746741  |
| 1  | -1.73347061 | 3.28815715 | -2.23852974 |
| 1  | -2.08315011 | 2.12701399 | 1.86810002  |
| 1  | -0.44004651 | 2.24319982 | -1.64833938 |
| 6  | -3.69331694 | 2.40614234 | -0.67627232 |
| 1  | -4.29115451 | 2.06726071 | 0.18693884  |
| 1  | -3.92464214 | 3.47531064 | -0.81018661 |
| 6  | -4.11568183 | 1.61714560 | -1.91834307 |
| 1  | -3.93512094 | 0.54010509 | -1.78378154 |
| 1  | -3.55987993 | 1.93866643 | -2.81109478 |
| 1  | -5.18533441 | 1.75304668 | -2.12896750 |
| 17 | -1.68206358 | 5.63741168 | -0.36092903 |
| 5  | -0.62253040 | 4.18298182 | -0.55410155 |
| 17 | 1.14656556  | 4.74907997 | -1.06006788 |
| 17 | 2.48598478  | 3.38122892 | 1.34512187  |
| 17 | 0.80572486  | 5.86770960 | 1.86767977  |
| 5  | 0.97706200  | 4.32458969 | 0.95986627  |

### TS(15-16)

$\nu = 279.49i \text{ cm}^{-1}$

|    |             |             |             |
|----|-------------|-------------|-------------|
| 6  | 0.54071922  | 2.25227326  | 1.06216274  |
| 13 | 0.45693960  | 0.94371350  | -0.40725033 |
| 6  | -1.30174365 | 1.65677417  | -1.18477702 |
| 6  | -1.43571369 | 2.95303777  | -0.37086297 |
| 6  | -0.90531423 | 2.80907948  | 1.08006368  |
| 6  | 1.56126607  | -0.55629863 | -1.05527446 |

|    |             |             |             |
|----|-------------|-------------|-------------|
| 6  | 1.17956116  | -1.19324768 | -2.40466162 |
| 1  | 0.85965039  | 1.87497761  | 2.04424611  |
| 1  | 1.24791081  | 3.05923564  | 0.79162060  |
| 1  | -0.86283015 | 3.74641651  | -0.87994724 |
| 1  | -1.54954708 | 2.06035042  | 1.58172866  |
| 1  | 2.60491905  | -0.19470222 | -1.07715477 |
| 1  | 1.54994013  | -1.31807188 | -0.25411597 |
| 1  | 1.84654456  | -2.03087621 | -2.65824658 |
| 1  | 0.15162655  | -1.58122018 | -2.39718177 |
| 1  | 1.23943715  | -0.46822297 | -3.22860936 |
| 1  | -1.91493852 | 0.79023668  | -0.89984994 |
| 1  | -0.98377082 | 1.68410166  | -2.23302294 |
| 35 | -2.77192456 | -0.07834927 | -3.51092520 |
| 5  | -3.06661115 | 1.61555989  | -2.52130864 |
| 35 | -2.87345982 | 3.27476691  | -3.58034133 |
| 35 | -4.58860373 | 1.60095235  | -1.25525135 |
| 6  | -1.01664723 | 4.12166319  | 1.87654952  |
| 1  | -0.53211999 | 3.96968124  | 2.85464075  |
| 1  | -0.42127045 | 4.89457517  | 1.35939350  |
| 6  | -2.44591501 | 4.62919455  | 2.09978011  |
| 1  | -3.06292828 | 3.86624143  | 2.59771700  |
| 1  | -2.94278723 | 4.89696534  | 1.15770658  |
| 1  | -2.44537114 | 5.52407261  | 2.73777426  |
| 1  | -2.48291101 | 3.28611508  | -0.35114973 |

### TS(16-17)

$v = 56.88i \text{ cm}^{-1}$

|    |             |             |             |
|----|-------------|-------------|-------------|
| 6  | 0.44213685  | 2.51501656  | 0.27389331  |
| 13 | 0.11385170  | 0.91491287  | -0.83404813 |
| 6  | -1.90395751 | 1.89945718  | -1.24494399 |
| 6  | -2.03522611 | 3.01202923  | -0.21487234 |
| 6  | -0.93232373 | 2.91853939  | 0.87592081  |
| 6  | 0.83116398  | -0.90747114 | -0.99789441 |
| 6  | 1.77352558  | -1.14998419 | -2.19445318 |
| 1  | 1.17798810  | 2.33422313  | 1.07164875  |
| 1  | 0.84058311  | 3.33958901  | -0.34445589 |
| 1  | -1.96885246 | 3.97492877  | -0.74548861 |
| 1  | -1.24201767 | 2.11081289  | 1.56932182  |
| 1  | 1.35585953  | -1.10564160 | -0.04671066 |
| 1  | -0.02697581 | -1.59516458 | -1.04484616 |
| 1  | 2.13741900  | -2.18754799 | -2.19591639 |
| 1  | 1.25777689  | -0.97945649 | -3.14898028 |
| 1  | 2.65581442  | -0.49439214 | -2.16656355 |
| 1  | -1.84637861 | 0.89366630  | -0.72123403 |
| 1  | -1.00991262 | 2.11654040  | -1.89112082 |
| 35 | -1.75009229 | 0.07426675  | -3.46374922 |
| 5  | -2.94186406 | 1.51759484  | -2.44241290 |
| 35 | -3.28099708 | 3.10702776  | -3.63407273 |
| 35 | -4.62453205 | 0.67030930  | -1.72522499 |
| 6  | -0.83248826 | 4.21382217  | 1.70276662  |

|   |             |            |            |
|---|-------------|------------|------------|
| 1 | -0.01912231 | 4.09610992 | 2.43664445 |
| 1 | -0.52389535 | 5.03176147 | 1.02934910 |
| 6 | -2.12150578 | 4.60133803 | 2.43527170 |
| 1 | -2.46157472 | 3.79061666 | 3.09713781 |
| 1 | -2.93875619 | 4.83124576 | 1.73844835 |
| 1 | -1.95998179 | 5.49188661 | 3.05804042 |
| 1 | -3.03269495 | 2.96457541 | 0.24243287 |

**TS(17-18)**

$\nu = 129.96i \text{ cm}^{-1}$

|    |             |             |             |
|----|-------------|-------------|-------------|
| 6  | -0.39636286 | 2.92078102  | -0.92330113 |
| 13 | 0.30743135  | 1.28393280  | -1.90490445 |
| 6  | -3.01721807 | 1.71884045  | -0.84098029 |
| 6  | -2.65378204 | 2.81099195  | 0.17960527  |
| 6  | -1.13724044 | 2.84177142  | 0.41781529  |
| 6  | 0.80596921  | -0.27718721 | -0.79903269 |
| 6  | 1.35603568  | -1.49164602 | -1.56750699 |
| 1  | 0.68624553  | 3.10458223  | -0.71288764 |
| 1  | -0.68855614 | 3.80363783  | -1.50528796 |
| 1  | -2.98253032 | 3.79430807  | -0.19680241 |
| 1  | -0.85609890 | 1.89769035  | 0.92228382  |
| 1  | 1.56078519  | 0.08111824  | -0.07606367 |
| 1  | -0.06728727 | -0.57278369 | -0.19297009 |
| 1  | 1.64838560  | -2.30728745 | -0.88831103 |
| 1  | 0.60989404  | -1.90243650 | -2.26423687 |
| 1  | 2.23992606  | -1.22407876 | -2.16353259 |
| 1  | -4.11257721 | 1.68627009  | -0.98302247 |
| 1  | -2.72479563 | 0.73099828  | -0.45104253 |
| 35 | 1.75460329  | 1.95911011  | -3.58363899 |
| 5  | -2.37642983 | 1.96685308  | -2.24421210 |
| 35 | -2.81125392 | 3.49322210  | -3.35909692 |
| 35 | -1.71599686 | 0.35665201  | -3.29556939 |
| 6  | -0.71987354 | 3.99995735  | 1.35095152  |
| 1  | 0.37862934  | 3.99523263  | 1.43925441  |
| 1  | -0.98358963 | 4.95499158  | 0.86550816  |
| 6  | -1.32984030 | 3.94486400  | 2.75587108  |
| 1  | -1.11024420 | 2.98433625  | 3.24636187  |
| 1  | -2.42099121 | 4.07160732  | 2.73808896  |
| 1  | -0.91789135 | 4.74250638  | 3.38956175  |
| 1  | -3.19237579 | 2.63177626  | 1.12098578  |

**TS(21-22)**

$\nu = 348.30i \text{ cm}^{-1}$

|    |             |             |             |
|----|-------------|-------------|-------------|
| 6  | 0.65349391  | 2.44895227  | 0.91149612  |
| 13 | 0.42975019  | 1.02223064  | -0.42168567 |
| 6  | -1.41862649 | 1.69158689  | -1.03720700 |
| 6  | -1.69053913 | 2.90066253  | -0.11741493 |
| 6  | -0.82105912 | 2.83244571  | 1.17538935  |
| 6  | 1.41282520  | -0.54875863 | -1.08962682 |
| 6  | 2.72081374  | -0.89861759 | -0.35441181 |

|    |             |             |             |
|----|-------------|-------------|-------------|
| 1  | -0.89086349 | 3.79457732  | 1.70384448  |
| 1  | 1.18699922  | 2.18740047  | 1.83522160  |
| 1  | 1.19926281  | 3.29587468  | 0.45873161  |
| 1  | -1.36629410 | 3.79256289  | -0.68398014 |
| 1  | -1.27622924 | 2.08071359  | 1.84644409  |
| 1  | 0.71733503  | -1.40550738 | -1.08105576 |
| 1  | 1.60665644  | -0.36385041 | -2.16109054 |
| 1  | 3.21481980  | -1.77335601 | -0.80343405 |
| 1  | 3.44064903  | -0.06787843 | -0.38347001 |
| 1  | 2.54390100  | -1.13390897 | 0.70506078  |
| 1  | -1.97125785 | 0.75232076  | -0.91136949 |
| 1  | -0.95756234 | 1.86440243  | -2.02201757 |
| 6  | -3.17870701 | 3.08416933  | 0.23304705  |
| 1  | -3.75653357 | 3.13583329  | -0.69835843 |
| 1  | -3.53524502 | 2.18391502  | 0.76309985  |
| 6  | -3.48443576 | 4.33109076  | 1.07051528  |
| 1  | -3.09347139 | 5.23807073  | 0.58459036  |
| 1  | -3.05596663 | 4.27860854  | 2.08058590  |
| 1  | -4.57032047 | 4.45807679  | 1.18113486  |
| 35 | -1.55340588 | 0.27710094  | -3.91848167 |
| 5  | -2.65782646 | 1.55988735  | -2.84337857 |
| 35 | -2.70776332 | 3.41351518  | -3.54213298 |
| 35 | -4.40536815 | 0.80534147  | -2.29219255 |

### TS(22-23)

$\nu = 123.41 \text{ i cm}^{-1}$

|    |             |             |             |
|----|-------------|-------------|-------------|
| 6  | -0.28412774 | 2.63884426  | -1.17832460 |
| 13 | -0.07013134 | 0.85133141  | -2.12385667 |
| 6  | -3.14750676 | 2.22657748  | -1.06866785 |
| 6  | -2.50548241 | 3.20123223  | -0.05798131 |
| 6  | -1.04036322 | 2.78949962  | 0.14319481  |
| 6  | -0.01041819 | -0.75920977 | -0.97838321 |
| 6  | 0.16321247  | -2.09960454 | -1.71403676 |
| 1  | 0.80324067  | 2.52061572  | -0.95146834 |
| 1  | -0.31560198 | 3.55053148  | -1.78610858 |
| 1  | -2.51824367 | 4.21205431  | -0.50428065 |
| 1  | -1.00934833 | 1.84336041  | 0.71243886  |
| 1  | 0.82738796  | -0.60790399 | -0.27403167 |
| 1  | -0.92052330 | -0.78157114 | -0.35495955 |
| 1  | 0.22829031  | -2.94583115 | -1.01280245 |
| 1  | -0.68101980 | -2.30349564 | -2.38978850 |
| 1  | 1.07537230  | -2.10679671 | -2.32728958 |
| 1  | -4.20791642 | 2.50137622  | -1.21826668 |
| 1  | -3.14602614 | 1.20757646  | -0.64776298 |
| 35 | 1.48768736  | 1.06242919  | -3.82529917 |
| 5  | -2.47239881 | 2.24428079  | -2.47572242 |
| 35 | -2.46309633 | 3.79829321  | -3.63605927 |
| 35 | -2.28903382 | 0.48407456  | -3.47679818 |
| 6  | -3.30773506 | 3.25057741  | 1.25367738  |
| 1  | -4.35978380 | 3.46902128  | 1.00793021  |

|   |             |            |            |
|---|-------------|------------|------------|
| 1 | -3.30236660 | 2.24647127 | 1.71217924 |
| 6 | -2.80932019 | 4.28486177 | 2.26861715 |
| 1 | -2.78039079 | 5.29180653 | 1.82582917 |
| 1 | -1.80052954 | 4.05058238 | 2.63517733 |
| 1 | -3.47436270 | 4.32492077 | 3.14243689 |
| 1 | -0.53611013 | 3.54105802 | 0.77205009 |

**TS(24-25)**

$\nu = 394.73i \text{ cm}^{-1}$

|    |             |             |             |
|----|-------------|-------------|-------------|
| 6  | 0.41058594  | 3.09194143  | -0.17792333 |
| 13 | 0.96500279  | 1.69934280  | -1.63517895 |
| 6  | -2.42339405 | 1.68454065  | -0.78568689 |
| 6  | -2.11519195 | 3.12297588  | -0.35341868 |
| 6  | -0.90178838 | 3.27111803  | 0.59560421  |
| 6  | 1.29594540  | -0.19551599 | -1.20283594 |
| 6  | 2.18001811  | -0.95353442 | -2.21135728 |
| 1  | 1.20670896  | 2.59072952  | 0.40034266  |
| 1  | 0.63708881  | 3.87095336  | -0.91969889 |
| 1  | -1.95840409 | 3.75592266  | -1.24117406 |
| 1  | -0.95094220 | 2.45382953  | 1.33735838  |
| 1  | 1.73955128  | -0.23910919 | -0.19333163 |
| 1  | 0.31404436  | -0.69291873 | -1.11934773 |
| 1  | 2.29822588  | -2.01081568 | -1.92991604 |
| 1  | 1.75104438  | -0.92720375 | -3.22295618 |
| 1  | 3.18828451  | -0.51859885 | -2.27451482 |
| 1  | -2.53278465 | 1.03130133  | 0.10015316  |
| 1  | -1.57632588 | 1.22960540  | -1.33857160 |
| 35 | 0.28010873  | 2.27358228  | -3.76554381 |
| 5  | -3.67095040 | 1.42981315  | -1.69825182 |
| 35 | -4.81928515 | 2.84446410  | -2.32746907 |
| 35 | -4.10363876 | -0.37979447 | -2.22657395 |
| 6  | -0.97157156 | 4.60303207  | 1.37672981  |
| 1  | -0.01077948 | 4.76981535  | 1.88442235  |
| 1  | -1.08902632 | 5.43508648  | 0.66311626  |
| 6  | -2.08652880 | 4.65071880  | 2.42636815  |
| 1  | -1.97058841 | 3.83914200  | 3.16033075  |
| 1  | -3.08847935 | 4.56351661  | 1.98379541  |
| 1  | -2.05562987 | 5.60160700  | 2.97560799  |
| 1  | -3.00365954 | 3.52806328  | 0.15063849  |
| 35 | 2.83840391  | 3.57233738  | 2.12137476  |
| 5  | 2.21027022  | 4.07114550  | 0.31537992  |
| 35 | 3.22264647  | 3.00629570  | -1.20623520 |
| 35 | 2.13974989  | 5.99494757  | -0.06736304 |

**TS(26-30a)**

$\nu = 210.74i \text{ cm}^{-1}$

|   |             |            |             |
|---|-------------|------------|-------------|
| 6 | -0.06800831 | 4.08598688 | -0.07702656 |
| 6 | -1.73913248 | 2.62170722 | -1.40892398 |
| 6 | -2.40174669 | 3.27511611 | -0.17701508 |
| 6 | -1.22044779 | 3.52349275 | 0.77954879  |

|    |             |            |             |
|----|-------------|------------|-------------|
| 1  | -0.16421979 | 5.15896548 | -0.31330432 |
| 1  | 0.81654824  | 4.16456890 | 0.59435122  |
| 1  | -2.81170091 | 4.25665017 | -0.47823802 |
| 1  | -0.90581153 | 2.56718385 | 1.22966915  |
| 1  | -2.38553713 | 2.62404363 | -2.29650375 |
| 1  | -1.51768028 | 1.56991519 | -1.16362681 |
| 5  | -0.39667080 | 3.45922802 | -1.61452760 |
| 35 | -0.30845827 | 4.79405085 | -3.09066828 |
| 35 | 1.27374721  | 1.96116861 | -2.08133616 |
| 35 | 2.07428613  | 1.98963342 | 1.13618075  |
| 5  | 1.72287502  | 3.12031050 | -0.44904681 |
| 35 | 3.00499941  | 4.54726045 | -0.85706517 |
| 6  | -3.54138395 | 2.44427171 | 0.42600027  |
| 1  | -4.27346077 | 2.22918136 | -0.36906872 |
| 1  | -3.13554803 | 1.46794171 | 0.74271660  |
| 6  | -4.25673469 | 3.11629000 | 1.60281474  |
| 1  | -4.66340033 | 4.09629665 | 1.31127405  |
| 1  | -3.58129220 | 3.27376335 | 2.45569553  |
| 1  | -5.09529992 | 2.50096733 | 1.95732330  |
| 1  | -1.45915304 | 4.21002411 | 1.60398331  |

### TS(26-30b)

$\nu = 204.62i \text{ cm}^{-1}$

|    |             |            |             |
|----|-------------|------------|-------------|
| 6  | -0.08727060 | 4.08036716 | -0.08013367 |
| 6  | -1.75111110 | 2.62574430 | -1.42984649 |
| 6  | -2.40648878 | 3.30172023 | -0.21091070 |
| 6  | -1.25549176 | 3.54139262 | 0.78347973  |
| 1  | -0.17487376 | 5.15567076 | -0.31624212 |
| 1  | 0.78656982  | 4.15782263 | 0.60697798  |
| 1  | -2.84981571 | 4.26949258 | -0.50011061 |
| 1  | -0.94340123 | 2.56099603 | 1.18584038  |
| 1  | -2.38230369 | 2.63868860 | -2.32751572 |
| 1  | -1.54594948 | 1.57243920 | -1.18476037 |
| 5  | -0.39486137 | 3.45000325 | -1.61470094 |
| 35 | -0.27658515 | 4.77588043 | -3.09777291 |
| 35 | 1.27267578  | 1.94141372 | -2.04017326 |
| 6  | -1.57923496 | 4.46834344 | 1.96297109  |
| 1  | -0.66436763 | 4.62290280 | 2.55872846  |
| 1  | -1.86389449 | 5.45959016 | 1.57012623  |
| 6  | -2.68861922 | 3.93748686 | 2.87692466  |
| 1  | -2.43178922 | 2.94444559 | 3.27465348  |
| 1  | -3.64616559 | 3.84989213 | 2.34542450  |
| 1  | -2.84495201 | 4.60935742 | 3.73194436  |
| 1  | -3.20881766 | 2.69101145 | 0.22568090  |
| 35 | 2.04210748  | 2.00058304 | 1.18541974  |
| 5  | 1.70335615  | 3.11939809 | -0.41378076 |
| 35 | 2.99466078  | 4.53870856 | -0.82121978 |

### TS(27-28)

$\nu = 354.92i \text{ cm}^{-1}$



|    |            |             |             |
|----|------------|-------------|-------------|
| 6  | 4.62948759 | 3.55331218  | -1.80701293 |
| 13 | 5.76549382 | 2.93348326  | -3.41222791 |
| 6  | 3.89785134 | 0.81786170  | -3.04150654 |
| 6  | 3.33609118 | 1.31155167  | -1.68538810 |
| 6  | 4.30159822 | 2.29331607  | -0.99525309 |
| 6  | 7.47852027 | 2.00706488  | -3.13681863 |
| 6  | 7.90624040 | 1.04187980  | -4.25826545 |
| 1  | 5.50308050 | 4.16034631  | -1.52670034 |
| 1  | 3.89650775 | 3.98455390  | -2.49949031 |
| 1  | 2.38968399 | 1.84220738  | -1.88400446 |
| 1  | 5.23499295 | 1.75852948  | -0.74744258 |
| 1  | 8.22610124 | 2.81418494  | -3.03053970 |
| 1  | 7.45920724 | 1.49464264  | -2.16145270 |
| 1  | 8.90543803 | 0.62516495  | -4.06380968 |
| 1  | 7.21288463 | 0.19380063  | -4.35561022 |
| 1  | 7.94123941 | 1.54599336  | -5.23369727 |
| 1  | 4.90811708 | 0.39237975  | -2.91288342 |
| 1  | 3.94561756 | 1.67276178  | -3.76377301 |
| 35 | 5.18118111 | 3.72895714  | -5.47792691 |
| 5  | 3.00952085 | -0.20475610 | -3.84893084 |
| 35 | 1.16138916 | 0.18598221  | -4.22080070 |
| 35 | 3.75998283 | -1.83581512 | -4.54672363 |
| 6  | 3.02917760 | 0.10642125  | -0.77207042 |
| 1  | 2.39998302 | -0.60367991 | -1.33446318 |
| 1  | 3.97074994 | -0.42761568 | -0.55489185 |
| 6  | 2.31361107 | 0.45504183  | 0.53685599  |
| 1  | 1.39587056 | 1.02882386  | 0.34438509  |
| 1  | 2.94376740 | 1.04797250  | 1.21253850  |
| 1  | 2.03154689 | -0.46150916 | 1.07264294  |
| 1  | 3.86673444 | 2.59353032  | -0.03164197 |
| 35 | 4.44470013 | 6.68415438  | -1.98577764 |
| 5  | 3.90646255 | 5.16248555  | -0.80694928 |
| 35 | 1.93897641 | 4.86044447  | -0.67711995 |
| 35 | 4.82865579 | 5.13670462  | 0.96646227  |

### TS(28-29)

$\nu = 236.45i \text{ cm}^{-1}$

|    |            |             |             |
|----|------------|-------------|-------------|
| 6  | 4.75864277 | 2.81142301  | -1.80520970 |
| 13 | 5.92335767 | 2.98144890  | -3.50908041 |
| 6  | 3.59255261 | -0.01684202 | -2.69490686 |
| 6  | 3.13087141 | 0.82631966  | -1.48941294 |
| 6  | 4.28670759 | 1.66781796  | -0.91280735 |
| 6  | 7.87279216 | 2.71335665  | -3.42713305 |
| 6  | 8.67731601 | 3.22288575  | -4.63723916 |
| 1  | 5.56004429 | 3.40132309  | -1.32559437 |
| 1  | 3.94653945 | 3.33497634  | -2.33481104 |
| 1  | 2.34039659 | 1.51701498  | -1.83130346 |
| 1  | 5.14024302 | 1.00491243  | -0.69247855 |
| 1  | 8.23845894 | 3.17942711  | -2.49605025 |
| 1  | 8.03582105 | 1.62828595  | -3.29783797 |

|    |            |             |             |
|----|------------|-------------|-------------|
| 1  | 9.74973768 | 2.99868761  | -4.53382377 |
| 1  | 8.33152067 | 2.76265354  | -5.57338754 |
| 1  | 8.58164456 | 4.31176988  | -4.75793595 |
| 1  | 4.35446757 | -0.74906545 | -2.37988888 |
| 1  | 4.10650785 | 0.63298759  | -3.43591253 |
| 35 | 4.81771450 | 2.63488881  | -5.50646691 |
| 5  | 2.50806215 | -0.73070555 | -3.56641443 |
| 35 | 0.75281077 | 0.02805205  | -3.85586234 |
| 35 | 2.92174988 | -2.37890582 | -4.48908614 |
| 6  | 2.51917371 | -0.08675783 | -0.40674185 |
| 1  | 1.82752808 | -0.78985249 | -0.89850322 |
| 1  | 3.32043208 | -0.70718782 | 0.03150216  |
| 6  | 1.75813962 | 0.64513195  | 0.70303652  |
| 1  | 0.95160277 | 1.26381658  | 0.28338737  |
| 1  | 2.40924041 | 1.30114972  | 1.29730067  |
| 1  | 1.30132858 | -0.07378634 | 1.39703417  |
| 1  | 3.97224403 | 2.08613288  | 0.05719537  |
| 35 | 5.40256889 | 5.54352407  | -2.86400823 |
| 5  | 4.39009986 | 4.81844567  | -1.18096071 |
| 35 | 2.46481646 | 5.19596312  | -1.18509239 |
| 35 | 5.32167722 | 5.17853097  | 0.51689309  |

### TS(33-34a)

$\nu = 231.33i \text{ cm}^{-1}$

|    |             |             |             |
|----|-------------|-------------|-------------|
| 6  | -3.43519756 | -0.87066883 | 1.46240784  |
| 13 | -1.36102195 | -1.09161715 | 1.51161964  |
| 6  | -1.08537786 | 0.36528028  | -0.10650867 |
| 6  | -2.40726555 | 1.09483572  | 0.26442387  |
| 6  | -3.64027283 | 0.17871271  | 0.31211780  |
| 6  | 2.35544566  | -2.40062099 | 0.29352863  |
| 6  | 1.86039401  | -1.17162281 | -0.50253933 |
| 13 | -0.08606001 | -1.47246572 | -0.74189629 |
| 6  | -0.08647655 | -2.75319262 | 1.01551329  |
| 6  | 1.39593381  | -2.67297128 | 1.47002450  |
| 6  | -0.55812976 | -0.26569428 | 3.13996173  |
| 6  | -1.46587542 | 0.55591307  | 4.07234094  |
| 6  | -0.87540523 | -2.27659786 | -2.38041229 |
| 6  | 0.03640791  | -3.33877697 | -3.03045786 |
| 1  | 2.30512349  | -3.28335169 | -0.37487517 |
| 6  | 4.42953208  | -3.50596936 | 1.39685900  |
| 1  | -4.49637862 | 0.81351224  | 0.60445313  |
| 6  | -5.37996172 | -1.02006824 | -1.16434793 |
| 1  | -4.43155928 | -1.36282751 | 1.47092509  |
| 1  | 2.42146501  | -1.06561934 | -1.44399259 |
| 1  | 2.05508282  | -0.25679156 | 0.08531457  |
| 1  | -0.19648980 | -3.52395381 | 0.22418428  |
| 1  | -2.59631855 | 1.92020846  | -0.44110981 |
| 1  | 1.51880872  | -1.87090680 | 2.21660715  |
| 1  | 1.66895531  | -3.61321413 | 1.97274935  |
| 1  | -1.86283355 | -2.71844749 | -2.17475432 |

|    |             |             |             |
|----|-------------|-------------|-------------|
| 1  | -1.06230429 | -1.46553193 | -3.10710482 |
| 1  | -0.38915048 | -3.72862814 | -3.96825569 |
| 1  | 1.03171639  | -2.93426299 | -3.26855894 |
| 1  | 0.19208537  | -4.20436697 | -2.36816902 |
| 1  | 4.35149338  | -4.37680404 | 0.72815386  |
| 1  | 5.49533920  | -3.35281758 | 1.61813739  |
| 1  | 3.93295889  | -3.76496407 | 2.34235241  |
| 1  | -3.48842030 | -0.35876153 | 2.44122416  |
| 6  | 3.82029003  | -2.25737391 | 0.74847901  |
| 1  | -1.04714676 | 0.38824341  | -1.21705247 |
| 1  | -0.23294351 | 0.98298298  | 0.21491680  |
| 1  | -0.68453186 | -3.23626536 | 1.80997211  |
| 1  | -2.28388884 | 1.56531924  | 1.25376841  |
| 6  | -3.97271322 | -0.42469395 | -1.06070721 |
| 1  | -0.10588572 | -1.08785873 | 3.71982226  |
| 1  | 0.29317816  | 0.35630190  | 2.81122423  |
| 1  | -0.91455745 | 0.94165530  | 4.94397791  |
| 1  | -1.90662483 | 1.42798868  | 3.56511688  |
| 1  | -2.29831942 | -0.04823755 | 4.46278983  |
| 1  | -6.14522623 | -0.26608697 | -0.92611839 |
| 1  | -5.57391087 | -1.38258631 | -2.18315479 |
| 1  | -5.52414097 | -1.87272938 | -0.48688162 |
| 1  | -3.22773620 | -1.18986362 | -1.32483663 |
| 1  | -3.87090549 | 0.37898687  | -1.81009924 |
| 1  | 3.88723723  | -1.40372188 | 1.44541377  |
| 1  | 4.42250197  | -1.97884717 | -0.13144756 |
| 17 | -2.70800959 | -3.11146998 | 3.35682059  |
| 5  | -3.73441818 | -2.89725471 | 1.84583918  |
| 17 | -3.21132266 | -3.82079738 | 0.37200857  |
| 17 | -5.51741014 | -3.16403914 | 2.23498096  |

### TS(33-34b)

$\nu = 348.53i \text{ cm}^{-1}$

|    |             |             |             |
|----|-------------|-------------|-------------|
| 6  | -3.39000314 | -1.11861776 | 0.60241430  |
| 13 | -1.63541034 | -0.91427107 | 1.49215158  |
| 6  | -0.88343718 | 0.43212220  | -0.02103513 |
| 6  | -2.27973954 | 1.11824203  | 0.14857284  |
| 6  | -3.49963894 | 0.21637902  | -0.18962900 |
| 6  | 2.68074572  | -2.38112767 | 0.13611166  |
| 6  | 2.14380092  | -1.04668576 | -0.42533169 |
| 13 | 0.20395958  | -1.41873738 | -0.48869039 |
| 6  | 0.37440877  | -2.72164795 | 1.31237437  |
| 6  | 1.91165893  | -2.74087421 | 1.42539711  |
| 6  | -1.19731705 | -0.21706740 | 3.30081022  |
| 6  | -2.43445474 | -0.08081020 | 4.21110918  |
| 6  | -0.60093808 | -2.42876431 | -2.00253805 |
| 6  | -0.41371361 | -1.77230797 | -3.38556081 |
| 1  | 2.47573672  | -3.17948884 | -0.60531687 |
| 6  | 4.82374591  | -3.70787987 | 0.76469987  |
| 1  | -4.38637486 | 0.77015988  | 0.16456111  |

|    |             |             |             |
|----|-------------|-------------|-------------|
| 6  | -4.99678610 | -0.61722746 | -2.09816979 |
| 1  | -3.43914228 | -1.99719090 | -0.05483532 |
| 1  | 2.59725387  | -0.81839443 | -1.40220546 |
| 1  | 2.40994851  | -0.22202470 | 0.25820911  |
| 1  | -0.15197432 | -3.48979765 | 0.73495154  |
| 1  | -2.30087825 | 2.04353515  | -0.44933623 |
| 1  | 2.19173618  | -2.01534859 | 2.20683602  |
| 1  | 2.23063746  | -3.72793806 | 1.79181646  |
| 1  | -0.10315759 | -3.41552031 | -2.00530749 |
| 1  | -1.66646675 | -2.65017844 | -1.82969341 |
| 1  | -0.80257842 | -2.40204315 | -4.20107920 |
| 1  | -0.93408524 | -0.80397354 | -3.45885339 |
| 1  | 0.64777712  | -1.58016942 | -3.60339204 |
| 1  | 4.58758542  | -4.48552789 | 0.02264205  |
| 1  | 5.91846080  | -3.63092201 | 0.82666136  |
| 1  | 4.46419867  | -4.05845591 | 1.74175555  |
| 1  | -4.19903322 | -1.23298925 | 1.33764409  |
| 6  | 4.20424997  | -2.36243140 | 0.36904666  |
| 1  | -0.68600882 | 0.44784605  | -1.11316191 |
| 1  | -0.10518565 | 1.06483928  | 0.43010624  |
| 1  | -0.12248874 | -2.29660028 | 2.19192150  |
| 1  | -2.38190905 | 1.45454912  | 1.19876935  |
| 6  | -3.66213076 | 0.02227905  | -1.70630428 |
| 1  | -0.44325166 | -0.84460163 | 3.80198708  |
| 1  | -0.71226161 | 0.76597765  | 3.16645039  |
| 1  | -2.17275452 | 0.34814410  | 5.19035873  |
| 1  | -3.20481751 | 0.56878359  | 3.76791458  |
| 1  | -2.90388904 | -1.05701469 | 4.39823486  |
| 1  | -5.84268492 | 0.00605878  | -1.77165593 |
| 1  | -5.07184087 | -0.74138993 | -3.18727194 |
| 1  | -5.11786102 | -1.60915103 | -1.64050413 |
| 1  | -2.83541560 | -0.59802891 | -2.08792190 |
| 1  | -3.57186586 | 1.00359340  | -2.20369145 |
| 1  | 4.42810635  | -1.60483153 | 1.14039771  |
| 1  | 4.68214203  | -2.00391566 | -0.55678721 |
| 17 | -2.13742363 | -3.82372135 | 2.52845615  |
| 5  | -0.34051956 | -4.23857062 | 2.60636797  |
| 17 | 0.43800460  | -3.91199971 | 4.20838000  |
| 17 | 0.11850570  | -5.81307264 | 1.84363391  |

### The 3 $\zeta$ basis set

|    | basis                 | basis2        |
|----|-----------------------|---------------|
| H  | {5s2p}/[3s1p]         | {5s2p}        |
| B  | {11s6p2d}/[6s3p2d]    | {10s3p3d1f}   |
| C  | {11s6p2d}/[6s3p2d]    | {10s3p3d1f}   |
| F  | {11s6p2d}/[6s3p2d]    | {10s3p3d1f}   |
| Al | {15s11p2d}/[10s6p2d]  | {14s3p3d1f1g} |
| Cl | {15s11p2d}/[10s6p2d]  | {14s3p3d1f1g} |
| Br | {18s14p9d}/[13s10p5d] | {18s3p3d1f1g} |

\$BASIS

default=3z

set=3z

|   | 1 | 4           |             |  |
|---|---|-------------|-------------|--|
| 0 | 3 | 2.951830e+1 | 2.663542e-2 |  |
|   |   | 4.459397e+0 | 1.992677e-1 |  |
|   |   | 1.020214e+0 | 8.443136e-1 |  |
| 0 | 1 | 2.789184e-1 | 1.0         |  |
| 0 | 1 | 8.185002e-2 | 1.0         |  |
| 1 | 1 | 1.020214e+0 | 1.0         |  |

|   | 5 | 11          |             |  |
|---|---|-------------|-------------|--|
| 0 | 6 | 1.358868e+4 | 4.892238e-4 |  |
|   |   | 2.036685e+3 | 3.795693e-3 |  |
|   |   | 4.634536e+2 | 1.979014e-2 |  |
|   |   | 1.310157e+2 | 8.118179e-2 |  |
|   |   | 4.229295e+1 | 2.713876e-1 |  |
|   |   | 1.468394e+1 | 7.086939e-1 |  |
| 0 | 1 | 5.272553e+0 | 1.0         |  |
| 0 | 1 | 1.917192e+0 | 1.0         |  |
| 0 | 1 | 6.072388e-1 | 1.0         |  |
| 0 | 1 | 2.069688e-1 | 1.0         |  |
| 0 | 1 | 6.607158e-2 | 1.0         |  |
| 1 | 4 | 1.468394e+1 | 2.156235e-2 |  |
|   |   | 5.272553e+0 | 5.694623e-2 |  |
|   |   | 1.917192e+0 | 2.686221e-1 |  |
|   |   | 6.072388e-1 | 7.674997e-1 |  |
| 1 | 1 | 2.069688e-1 | 1.0         |  |
| 1 | 1 | 6.607158e-2 | 1.0         |  |
| 2 | 1 | 6.072388e-1 | 1.0         |  |
| 2 | 1 | 2.069688e-1 | 1.0         |  |

|   | 6 | 11          |             |  |
|---|---|-------------|-------------|--|
| 0 | 6 | 2.192464e+4 | 4.524117e-4 |  |

|   |   |             |             |
|---|---|-------------|-------------|
|   |   | 3.285791e+3 | 3.511161e-3 |
|   |   | 7.474901e+2 | 1.834054e-2 |
|   |   | 2.109105e+2 | 7.595411e-2 |
|   |   | 6.756323e+1 | 2.620972e-1 |
|   |   | 2.308674e+1 | 7.228794e-1 |
| 0 | 1 | 8.151221e+0 | 1.0         |
| 0 | 1 | 2.947252e+0 | 1.0         |
| 0 | 1 | 9.660187e-1 | 1.0         |
| 0 | 1 | 3.231446e-1 | 1.0         |
| 0 | 1 | 1.010825e-1 | 1.0         |
| 1 | 4 | 2.308674e+1 | 2.068355e-2 |
|   |   | 8.151221e+0 | 6.066722e-2 |
|   |   | 2.947252e+0 | 2.747077e-1 |
|   |   | 9.660187e-1 | 7.569660e-1 |
| 1 | 1 | 3.231446e-1 | 1.0         |
| 1 | 1 | 1.010825e-1 | 1.0         |
| 2 | 1 | 9.660187e-1 | 1.0         |
| 2 | 1 | 3.231446e-1 | 1.0         |

9 11

|   |   |             |             |
|---|---|-------------|-------------|
| 0 | 6 | 5.708712e+4 | 3.900913e-4 |
|   |   | 8.554214e+3 | 3.028942e-3 |
|   |   | 1.944314e+3 | 1.588079e-2 |
|   |   | 5.453350e+2 | 6.713141e-2 |
|   |   | 1.708447e+2 | 2.467701e-1 |
|   |   | 5.590937e+1 | 7.474134e-1 |
| 0 | 1 | 1.888258e+1 | 1.0         |
| 0 | 1 | 6.650594e+0 | 1.0         |
| 0 | 1 | 2.215890e+0 | 1.0         |
| 0 | 1 | 7.191028e-1 | 1.0         |
| 0 | 1 | 2.115702e-1 | 1.0         |
| 1 | 4 | 5.590937e+1 | 1.993210e-2 |
|   |   | 1.888258e+1 | 7.061877e-2 |
|   |   | 6.650594e+0 | 3.007673e-1 |
|   |   | 2.215890e+0 | 7.277287e-1 |
| 1 | 1 | 7.191028e-1 | 1.0         |
| 1 | 1 | 2.115702e-1 | 1.0         |
| 2 | 1 | 2.215890e+0 | 1.0         |
| 2 | 1 | 7.191028e-1 | 1.0         |

13 18

|   |   |             |             |
|---|---|-------------|-------------|
| 0 | 6 | 2.382966e+5 | 3.811725e-4 |
|   |   | 3.569645e+4 | 2.962297e-3 |
|   |   | 8.116019e+3 | 1.557456e-2 |
|   |   | 2.284096e+3 | 6.609540e-2 |
|   |   | 7.300537e+2 | 2.418684e-1 |
|   |   | 2.546557e+2 | 7.476854e-1 |
| 0 | 1 | 9.502825e+1 | 1.0         |
| 0 | 1 | 3.741167e+1 | 1.0         |

|   |   |             |             |
|---|---|-------------|-------------|
| 0 | 1 | 1.536696e+1 | 1.0         |
| 0 | 1 | 6.290235e+0 | 1.0         |
| 0 | 1 | 2.543955e+0 | 1.0         |
| 0 | 1 | 1.012528e+0 | 1.0         |
| 0 | 1 | 3.453793e-1 | 1.0         |
| 0 | 1 | 1.253362e-1 | 1.0         |
| 0 | 1 | 4.096564e-2 | 1.0         |
| 1 | 6 | 7.300537e+2 | 1.232426e-3 |
|   |   | 2.546557e+2 | 5.132843e-3 |
|   |   | 9.502825e+1 | 2.674667e-2 |
|   |   | 3.741167e+1 | 9.921941e-2 |
|   |   | 1.536696e+1 | 3.081204e-1 |
|   |   | 6.290235e+0 | 6.701420e-1 |
| 1 | 1 | 2.543955e+0 | 1.0         |
| 1 | 1 | 1.012528e+0 | 1.0         |
| 1 | 1 | 3.453793e-1 | 1.0         |
| 1 | 1 | 1.253362e-1 | 1.0         |
| 1 | 1 | 4.096564e-2 | 1.0         |
| 2 | 1 | 3.453793e-1 | 1.0         |
| 2 | 1 | 1.253362e-1 | 1.0         |

17 18

|   |   |             |             |
|---|---|-------------|-------------|
| 0 | 6 | 4.886680e+5 | 3.683119e-4 |
|   |   | 7.319565e+4 | 2.862919e-3 |
|   |   | 1.663917e+4 | 1.506844e-2 |
|   |   | 4.678381e+3 | 6.424228e-2 |
|   |   | 1.491358e+3 | 2.379472e-1 |
|   |   | 5.186839e+2 | 7.529444e-1 |
| 0 | 1 | 1.935542e+2 | 1.0         |
| 0 | 1 | 7.648497e+1 | 1.0         |
| 0 | 1 | 3.167528e+1 | 1.0         |
| 0 | 1 | 1.322806e+1 | 1.0         |
| 0 | 1 | 5.558031e+0 | 1.0         |
| 0 | 1 | 2.335902e+0 | 1.0         |
| 0 | 1 | 8.433804e-1 | 1.0         |
| 0 | 1 | 3.183365e-1 | 1.0         |
| 0 | 1 | 1.082213e-1 | 1.0         |
| 1 | 6 | 1.491358e+3 | 1.074090e-3 |
|   |   | 5.186839e+2 | 4.581779e-3 |
|   |   | 1.935542e+2 | 2.412967e-2 |
|   |   | 7.648497e+1 | 9.277696e-2 |
|   |   | 3.167528e+1 | 2.982536e-1 |
|   |   | 1.322806e+1 | 6.822171e-1 |
| 1 | 1 | 5.558031e+0 | 1.0         |
| 1 | 1 | 2.335902e+0 | 1.0         |
| 1 | 1 | 8.433804e-1 | 1.0         |
| 1 | 1 | 3.183365e-1 | 1.0         |
| 1 | 1 | 1.082213e-1 | 1.0         |
| 2 | 1 | 8.433804e-1 | 1.0         |
| 2 | 1 | 3.183365e-1 | 1.0         |

35 28

|   |   |             |             |
|---|---|-------------|-------------|
| 0 | 6 | 4.183132e+6 | 3.518723e-4 |
|   |   | 6.264457e+5 | 2.736140e-3 |
|   |   | 1.424236e+5 | 1.441783e-2 |
|   |   | 4.008375e+4 | 6.165851e-2 |
|   |   | 1.281741e+4 | 2.308731e-1 |
|   |   | 4.483365e+3 | 7.608863e-1 |
| 0 | 1 | 1.686773e+3 | 1.0         |
| 0 | 1 | 6.705166e+2 | 1.0         |
| 0 | 1 | 2.774937e+2 | 1.0         |
| 0 | 1 | 1.186309e+2 | 1.0         |
| 0 | 1 | 5.205105e+1 | 1.0         |
| 0 | 1 | 2.339561e+1 | 1.0         |
| 0 | 1 | 1.059655e+1 | 1.0         |
| 0 | 1 | 4.688213e+0 | 1.0         |
| 0 | 1 | 2.015214e+0 | 1.0         |
| 0 | 1 | 7.912240e-1 | 1.0         |
| 0 | 1 | 3.004622e-1 | 1.0         |
| 0 | 1 | 1.010219e-1 | 1.0         |
| 1 | 5 | 1.281741e+4 | 2.089890e-3 |
|   |   | 4.483365e+3 | 9.199630e-3 |
|   |   | 1.686773e+3 | 4.878943e-2 |
|   |   | 6.705166e+2 | 2.120892e-1 |
|   |   | 2.774937e+2 | 7.960288e-1 |
| 1 | 1 | 1.186309e+2 | 1.0         |
| 1 | 1 | 5.205105e+1 | 1.0         |
| 1 | 1 | 2.339561e+1 | 1.0         |
| 1 | 1 | 1.059655e+1 | 1.0         |
| 1 | 1 | 4.688213e+0 | 1.0         |
| 1 | 1 | 2.015214e+0 | 1.0         |
| 1 | 1 | 7.912240e-1 | 1.0         |
| 1 | 1 | 3.004622e-1 | 1.0         |
| 1 | 1 | 1.010219e-1 | 1.0         |
| 2 | 5 | 2.774937e+2 | 5.848704e-3 |
|   |   | 1.186309e+2 | 2.303397e-2 |
|   |   | 5.205105e+1 | 1.032942e-1 |
|   |   | 2.339561e+1 | 3.140592e-1 |
|   |   | 1.059655e+1 | 6.729262e-1 |
| 2 | 1 | 4.688213e+0 | 1.0         |
| 2 | 1 | 2.015214e+0 | 1.0         |
| 2 | 1 | 7.912240e-1 | 1.0         |
| 2 | 1 | 3.004622e-1 | 1.0         |

\$END

\$Basis2



default=3z

set=3z

1 7

|   |   |                |     |
|---|---|----------------|-----|
| 0 | 1 | 2.04937577e-01 | 1.0 |
| 0 | 1 | 5.52861763e-01 | 1.0 |
| 1 | 1 | 5.52861763e-01 | 1.0 |
| 0 | 1 | 1.49145966e+00 | 1.0 |
| 1 | 1 | 1.49145966e+00 | 1.0 |
| 0 | 1 | 4.02352281e+00 | 1.0 |
| 0 | 1 | 1.08542901e+01 | 1.0 |

5 17

|   |   |                |     |
|---|---|----------------|-----|
| 0 | 1 | 1.28115547e-01 | 1.0 |
| 0 | 1 | 3.23423392e-01 | 1.0 |
| 1 | 1 | 3.23423392e-01 | 1.0 |
| 2 | 1 | 3.23423392e-01 | 1.0 |
| 0 | 1 | 8.16471480e-01 | 1.0 |
| 1 | 1 | 8.16471480e-01 | 1.0 |
| 2 | 1 | 8.16471480e-01 | 1.0 |
| 3 | 1 | 8.16471480e-01 | 1.0 |
| 0 | 1 | 2.06115480e+00 | 1.0 |
| 1 | 1 | 2.06115480e+00 | 1.0 |
| 2 | 1 | 2.06115480e+00 | 1.0 |
| 0 | 1 | 5.20331602e+00 | 1.0 |
| 0 | 1 | 1.31355964e+01 | 1.0 |
| 0 | 1 | 3.31603715e+01 | 1.0 |
| 0 | 1 | 8.37122431e+01 | 1.0 |
| 0 | 1 | 2.11328744e+02 | 1.0 |
| 0 | 1 | 5.33492309e+02 | 1.0 |

6 17

|   |   |                |     |
|---|---|----------------|-----|
| 0 | 1 | 1.75774940e-01 | 1.0 |
| 0 | 1 | 4.40360864e-01 | 1.0 |
| 1 | 1 | 4.40360864e-01 | 1.0 |
| 2 | 1 | 4.40360864e-01 | 1.0 |
| 0 | 1 | 1.10321580e+00 | 1.0 |
| 1 | 1 | 1.10321580e+00 | 1.0 |
| 2 | 1 | 1.10321580e+00 | 1.0 |
| 3 | 1 | 1.10321580e+00 | 1.0 |
| 0 | 1 | 2.76383573e+00 | 1.0 |
| 1 | 1 | 2.76383573e+00 | 1.0 |
| 2 | 1 | 2.76383573e+00 | 1.0 |
| 0 | 1 | 6.92411041e+00 | 1.0 |
| 0 | 1 | 1.73466550e+01 | 1.0 |
| 0 | 1 | 4.34577760e+01 | 1.0 |
| 0 | 1 | 1.08872765e+02 | 1.0 |

|   |   |                |     |
|---|---|----------------|-----|
| 0 | 1 | 2.72753926e+02 | 1.0 |
| 0 | 1 | 6.83317851e+02 | 1.0 |

9 17

|   |   |                |     |
|---|---|----------------|-----|
| 0 | 1 | 3.44930222e-01 | 1.0 |
| 0 | 1 | 8.78520791e-01 | 1.0 |
| 1 | 1 | 8.78520791e-01 | 1.0 |
| 2 | 1 | 8.78520791e-01 | 1.0 |
| 0 | 1 | 2.23755047e+00 | 1.0 |
| 1 | 1 | 2.23755047e+00 | 1.0 |
| 2 | 1 | 2.23755047e+00 | 1.0 |
| 3 | 1 | 2.23755047e+00 | 1.0 |
| 0 | 1 | 5.69893411e+00 | 1.0 |
| 1 | 1 | 5.69893411e+00 | 1.0 |
| 2 | 1 | 5.69893411e+00 | 1.0 |
| 0 | 1 | 1.45149128e+01 | 1.0 |
| 0 | 1 | 3.69687893e+01 | 1.0 |
| 0 | 1 | 9.41577396e+01 | 1.0 |
| 0 | 1 | 2.39815263e+02 | 1.0 |
| 0 | 1 | 6.10798014e+02 | 1.0 |
| 0 | 1 | 1.55567335e+03 | 1.0 |

13 22

|   |   |                |     |
|---|---|----------------|-----|
| 0 | 1 | 6.36338538e-02 | 1.0 |
| 0 | 1 | 1.46064791e-01 | 1.0 |
| 1 | 1 | 1.46064791e-01 | 1.0 |
| 2 | 1 | 1.46064791e-01 | 1.0 |
| 0 | 1 | 3.35276303e-01 | 1.0 |
| 1 | 1 | 3.35276303e-01 | 1.0 |
| 2 | 1 | 3.35276303e-01 | 1.0 |
| 3 | 1 | 3.35276303e-01 | 1.0 |
| 4 | 1 | 3.35276303e-01 | 1.0 |
| 0 | 1 | 7.69591345e-01 | 1.0 |
| 1 | 1 | 7.69591345e-01 | 1.0 |
| 2 | 1 | 7.69591345e-01 | 1.0 |
| 0 | 1 | 1.76651566e+00 | 1.0 |
| 0 | 1 | 4.05485013e+00 | 1.0 |
| 0 | 1 | 9.30748025e+00 | 1.0 |
| 0 | 1 | 2.13643380e+01 | 1.0 |
| 0 | 1 | 4.90395816e+01 | 1.0 |
| 0 | 1 | 1.12565181e+02 | 1.0 |
| 0 | 1 | 2.58381484e+02 | 1.0 |
| 0 | 1 | 5.93087410e+02 | 1.0 |
| 0 | 1 | 1.36136951e+03 | 1.0 |
| 0 | 1 | 3.12487995e+03 | 1.0 |

17 22

|   |   |                |     |
|---|---|----------------|-----|
| 0 | 1 | 2.01070734e-01 | 1.0 |
|---|---|----------------|-----|

|   |   |                |     |
|---|---|----------------|-----|
| 0 | 1 | 4.40284706e-01 | 1.0 |
| 1 | 1 | 4.40284706e-01 | 1.0 |
| 2 | 1 | 4.40284706e-01 | 1.0 |
| 0 | 1 | 9.64091681e-01 | 1.0 |
| 1 | 1 | 9.64091681e-01 | 1.0 |
| 2 | 1 | 9.64091681e-01 | 1.0 |
| 3 | 1 | 9.64091681e-01 | 1.0 |
| 4 | 1 | 9.64091681e-01 | 1.0 |
| 0 | 1 | 2.11107213e+00 | 1.0 |
| 1 | 1 | 2.11107213e+00 | 1.0 |
| 2 | 1 | 2.11107213e+00 | 1.0 |
| 0 | 1 | 4.62261589e+00 | 1.0 |
| 0 | 1 | 1.01221448e+01 | 1.0 |
| 0 | 1 | 2.21644664e+01 | 1.0 |
| 0 | 1 | 4.85335452e+01 | 1.0 |
| 0 | 1 | 1.06273933e+02 | 1.0 |
| 0 | 1 | 2.32708094e+02 | 1.0 |
| 0 | 1 | 5.09561051e+02 | 1.0 |
| 0 | 1 | 1.11578613e+03 | 1.0 |
| 0 | 1 | 2.44323756e+03 | 1.0 |
| 0 | 1 | 5.34995874e+03 | 1.0 |

35 26

|   |   |                |     |
|---|---|----------------|-----|
| 0 | 1 | 1.57524529e-01 | 1.0 |
| 0 | 1 | 3.17148739e-01 | 1.0 |
| 1 | 1 | 3.17148739e-01 | 1.0 |
| 2 | 1 | 3.17148739e-01 | 1.0 |
| 0 | 1 | 6.38524826e-01 | 1.0 |
| 1 | 1 | 6.38524826e-01 | 1.0 |
| 2 | 1 | 6.38524826e-01 | 1.0 |
| 3 | 1 | 6.38524826e-01 | 1.0 |
| 4 | 1 | 6.38524826e-01 | 1.0 |
| 0 | 1 | 1.28556070e+00 | 1.0 |
| 1 | 1 | 1.28556070e+00 | 1.0 |
| 2 | 1 | 1.28556070e+00 | 1.0 |
| 0 | 1 | 2.58825692e+00 | 1.0 |
| 0 | 1 | 5.21101332e+00 | 1.0 |
| 0 | 1 | 1.04914854e+01 | 1.0 |
| 0 | 1 | 2.11228143e+01 | 1.0 |
| 0 | 1 | 4.25271794e+01 | 1.0 |
| 0 | 1 | 8.56212133e+01 | 1.0 |
| 0 | 1 | 1.72383691e+02 | 1.0 |
| 0 | 1 | 3.47065125e+02 | 1.0 |
| 0 | 1 | 6.98756360e+02 | 1.0 |
| 0 | 1 | 1.40682660e+03 | 1.0 |
| 0 | 1 | 2.83240512e+03 | 1.0 |
| 0 | 1 | 5.70256402e+03 | 1.0 |
| 0 | 1 | 1.14811388e+04 | 1.0 |
| 0 | 1 | 2.31153124e+04 | 1.0 |

**Table S4.** Energy effects and activation barriers of reactions calculated by PBE/3 $\zeta$ , PBE/6-31G(d,p), PBE(GD3)/6-31G(d,p), PBE0/6-31G(d,p), PBE0(GD3)/6-31G(d,p) methods.

| Reaction         | $\Delta E_r$ , kcal/mol |                |                     |                 |                      | $\Delta E^\ddagger$ , kcal/mol |                |                     |                 |                      |
|------------------|-------------------------|----------------|---------------------|-----------------|----------------------|--------------------------------|----------------|---------------------|-----------------|----------------------|
|                  | PBE/3 $\zeta$           | PBE/6-31G(d,p) | PBE(GD3)/6-31G(d,p) | PBE0/6-31G(d,p) | PBE0(GD3)/6-31G(d,p) | PBE/3 $\zeta$                  | PBE/6-31G(d,p) | PBE(GD3)/6-31G(d,p) | PBE0/6-31G(d,p) | PBE0(GD3)/6-31G(d,p) |
| <b>3+4→5a</b>    | -1.4                    | -6.2           | -8.7                | -5.3            | -7.8                 |                                |                |                     |                 |                      |
| <b>5a→6a</b>     | -20.3                   | -20.5          | -21.0               | -20.4           | -21.0                | 0.3                            | -1.4           | -1.9                | -1.0            | -1.5                 |
| <b>6a→7a</b>     | -15.2                   | -16.5          | -15.9               | -17.9           | -17.1                | -2.8                           | -6.8           | -7.3                | -6.5            | -7.0                 |
| <b>7a→8+9</b>    | 10.0                    | 16.8           | 19.1                | 17.3            | 19.7                 |                                |                |                     |                 |                      |
| <b>3+4→5b</b>    | -1.1                    | -5.2           | -7.5                | -4.5            | -6.7                 |                                |                |                     |                 |                      |
| <b>5b→6b</b>     | -20.7                   | -21.8          | -22.8               | -21.7           | -22.8                | 1.0                            | -1.6           | -2.2                | -1.0            | -1.7                 |
| <b>6b→7b</b>     | -15.1                   | -16.0          | -15.2               | -17.4           | -16.4                | 4.5                            | 1.0            | 0.9                 | 1.7             | 1.6                  |
| <b>7b→8+9</b>    | 10.0                    | 16.7           | 19.0                | 17.3            | 19.6                 |                                |                |                     |                 |                      |
| <b>6a+4→10a</b>  | -1.1                    | -2.6           | -4.3                | -2.3            | -3.9                 |                                |                |                     |                 |                      |
| <b>10a→11a</b>   | -22.0                   | -26.5          | -27.6               | -26.9           | -28.1                | 4.6                            | -2.1           | -3.9                | -0.9            | -2.8                 |
| <b>11a→8+12</b>  | 9.0                     | 16.6           | 19.5                | 16.8            | 19.7                 |                                |                |                     |                 |                      |
| <b>12→13a</b>    | 6.1                     | 8.0            | 9.7                 | 7.2             | 9.1                  | 27.7                           | 24.0           | 23.6                | 25.6            | 25.1                 |
| <b>13a→4+9</b>   | 2.7                     | 4.8            | 6.0                 | 4.6             | 5.9                  |                                |                |                     |                 |                      |
| <b>6b+4→10b</b>  | -1.1                    | -2.7           | -4.6                | -2.4            | -4.2                 |                                |                |                     |                 |                      |
| <b>10b→11b</b>   | -22.9                   | -27.6          | -28.4               | -28.2           | -29.0                | 3.5                            | -3.2           | -4.5                | -2.4            | -3.8                 |
| <b>11b→8+12</b>  | 10.1                    | 18.3           | 21.2                | 18.6            | 21.5                 |                                |                |                     |                 |                      |
| <b>12→13b</b>    | 6.1                     | 8.0            | 9.7                 | 7.2             | 9.1                  | 26.4                           | 23.2           | 23.0                | 24.6            | 24.3                 |
| <b>13b→4+9</b>   | 2.7                     | 4.8            | 6.0                 | 4.6             | 5.9                  |                                |                |                     |                 |                      |
| <b>3+4'→5a'</b>  | -0.9                    | -1.6           | -4.7                | -1.4            | -4.4                 |                                |                |                     |                 |                      |
| <b>5a'→6a'</b>   | -33.1                   | -33.8          | -36.2               | -35.9           | -38.6                | 3.4                            | 3.0            | 0.7                 | 4.1             | 1.7                  |
| <b>6a'→7a'</b>   | -23.2                   | -22.8          | -21.8               | -24.5           | -23.3                | 2.7                            | 1.7            | 0.5                 | 2.3             | 0.9                  |
| <b>7a'→8'+9'</b> | 7.9                     | 9.6            | 13.0                | 9.8             | 13.3                 |                                |                |                     |                 |                      |
| <b>3+4'→5b'</b>  | -1.2                    | -1.8           | -4.8                | -1.6            | -4.6                 |                                |                |                     |                 |                      |
| <b>5b'→6b'</b>   | -31.8                   | -32.8          | -35.8               | -34.8           | -38.0                | 3.8                            | 3.3            | 1.2                 | 4.5             | 2.2                  |
| <b>6b'→7b'</b>   | -23.4                   | -22.5          | -21.1               | -24.4           | -22.8                | 6.4                            | 6.2            | 6.0                 | 7.2             | 6.9                  |
| <b>7b'→8'+9'</b> | 7.1                     | 8.6            | 12.1                | 8.8             | 12.5                 |                                |                |                     |                 |                      |

|                             |       |       |       |       |       |      |       |       |       |       |
|-----------------------------|-------|-------|-------|-------|-------|------|-------|-------|-------|-------|
| <b>6a'+4'&gt;10a'</b>       | -0.1  | -0.7  | -3.1  | -0.5  | -2.9  |      |       |       |       |       |
| <b>10a'→11a'</b>            | -26.6 | -27.0 | -29.2 | -28.8 | -31.0 | 10.0 | 8.9   | 5.3   | 10.1  | 6.4   |
| <b>11a'→8'+12'</b>          | 6.9   | 8.2   | 12.4  | 8.3   | 12.6  |      |       |       |       |       |
| <b>12'→13a'</b>             | 3.6   | 5.2   | 7.7   | 5.1   | 8.0   | 35.2 | 35.7  | 35.3  | 37.3  | 36.5  |
| <b>13a'→4'+9'</b>           | 1.0   | 1.2   | 3.4   | 1.1   | 3.2   |      |       |       |       |       |
| <b>6b'+4'→10b'</b>          | -0.7  | -1.3  | -3.6  | -1.1  | -3.4  |      |       |       |       |       |
| <b>10b'→11b'</b>            | -28.8 | -28.9 | -28.8 | -30.8 | -30.8 | 15.2 | 15.7  | 14.1  | 17.1  | 15.4  |
| <b>11b'→8'+12'</b>          | 8.6   | 9.9   | 12.3  | 10.0  | 12.6  |      |       |       |       |       |
| <b>12'→13b'</b>             | 3.6   | 5.1   | 7.7   | 5.1   | 8.0   | 35.9 | 36.4  | 36.2  | 38.0  | 37.4  |
| <b>13b'→4'+9'</b>           | 1.0   | 1.2   | 3.4   | 1.2   | 3.3   |      |       |       |       |       |
| <b>3+14→15</b>              | -0.4  | -1.9  | -4.3  | -1.7  | -4.1  |      |       |       |       |       |
| <b>15→16</b>                | -1.3  | -4.7  | -8.1  | -6.1  | -10.0 | 9.2  | 5.9   | 2.9   | 6.6   | 3.2   |
| <b>16→17</b>                | -33.3 | -36.6 | -35.7 | -37.4 | -36.3 | 1.6  | 0.8   | 1.3   | 1.4   | 1.9   |
| <b>17→18</b>                | -26.8 | -37.8 | -37.6 | -40.2 | -40.0 | -0.3 | -10.4 | -12.5 | -10.0 | -12.2 |
| <b>18→19+20</b>             | 7.3   | 18.9  | 22.3  | 18.9  | 22.6  |      |       |       |       |       |
| <b>3+14→21</b>              | -0.2  | -1.7  | -3.9  | -1.5  | -3.7  |      |       |       |       |       |
| <b>21→22</b>                | -34.1 | -40.7 | -44.3 | -43.0 | -46.7 | 14.3 | 9.2   | 5.5   | 10.1  | 5.9   |
| <b>22→23</b>                | -27.5 | -38.5 | -37.5 | -40.9 | -39.8 | -1.4 | -11.4 | -12.6 | -11.0 | -12.4 |
| <b>23→19+20</b>             | 7.3   | 18.8  | 22.2  | 18.9  | 22.5  |      |       |       |       |       |
| <b>17+14→24</b>             | -1.2  | -4.2  | -7.1  | -4.0  | -6.9  |      |       |       |       |       |
| <b>24→25</b>                | -29.7 | -43.3 | -45.0 | -46.0 | -48.1 | 15.5 | 4.8   | 1.2   | 6.0   | 1.9   |
| <b>25→26+19</b>             | 7.8   | 19.1  | 21.9  | 19.4  | 22.6  |      |       |       |       |       |
| <b>22+14→27</b>             | -0.9  | -2.7  | -5.6  | -2.5  | -5.3  |      |       |       |       |       |
| <b>27→28</b>                | 12.9  | 8.1   | 4.1   | 7.6   | 3.0   | 16.1 | 11.0  | 7.5   | 11.6  | 7.4   |
| <b>28→29</b>                | -44.7 | -55.7 | -53.8 | -57.8 | -55.7 | -0.3 | -4.4  | -2.7  | -2.8  | -0.9  |
| <b>29→26+19</b>             | 8.9   | 21.2  | 25.2  | 21.4  | 25.7  |      |       |       |       |       |
| <b>26→30a</b>               | 2.7   | 6.1   | 8.9   | 6.2   | 9.3   | 28.6 | 25.1  | 24.8  | 26.8  | 26.2  |
| <b>30a→14+20</b>            | 0.9   | 3.3   | 5.9   | 3.2   | 5.7   |      |       |       |       |       |
| <b>26→30b</b>               | 2.9   | 6.7   | 9.1   | 6.8   | 9.6   | 28.6 | 25.1  | 24.5  | 26.8  | 25.8  |
| <b>30b→14+20</b>            | 0.7   | 2.8   | 5.7   | 2.5   | 5.4   |      |       |       |       |       |
| <b>33+4'→34a</b>            | -28.4 | -30.0 | -35.1 | -31.7 | -36.9 | 16.7 | 15.2  | 7.7   | 16.0  | 8.1   |
| <b>33+4'→34b</b>            | -33.2 | -33.0 | -35.6 | -34.6 | -37.2 | 21.3 | 20.3  | 14.8  | 22.9  | 17.2  |
| <b>6a+THF→<br/>7a+THF</b>   | -27.1 | -25.3 | -23.2 | -27.2 | -24.9 | 16.8 | 16.7  | 14.6  | 17.8  | 15.5  |
| <b>6a+2THF→<br/>7a+2THF</b> | -24.8 | -22.2 | -18.6 | -22.4 | -17.9 | 20.0 | 21.4  | 22.7  | 24.3  | 25.8  |

|                                    |       |       |       |       |       |      |      |      |      |      |
|------------------------------------|-------|-------|-------|-------|-------|------|------|------|------|------|
| <b>6b+THF</b> →<br><b>7b+THF</b>   | -29.7 | -28.1 | -25.5 | -30.0 | -27.2 | 14.0 | 14.2 | 13.2 | 15.1 | 13.9 |
| <b>6b+2THF</b> →<br><b>7b+2THF</b> | -5.2  | -1.7  | 2.3   | 0.8   | 5.7   | 15.7 | 17.6 | 19.3 | 20.2 | 22.1 |

It follows from Table S4 the results are not very sensitive to the functional and basis set.

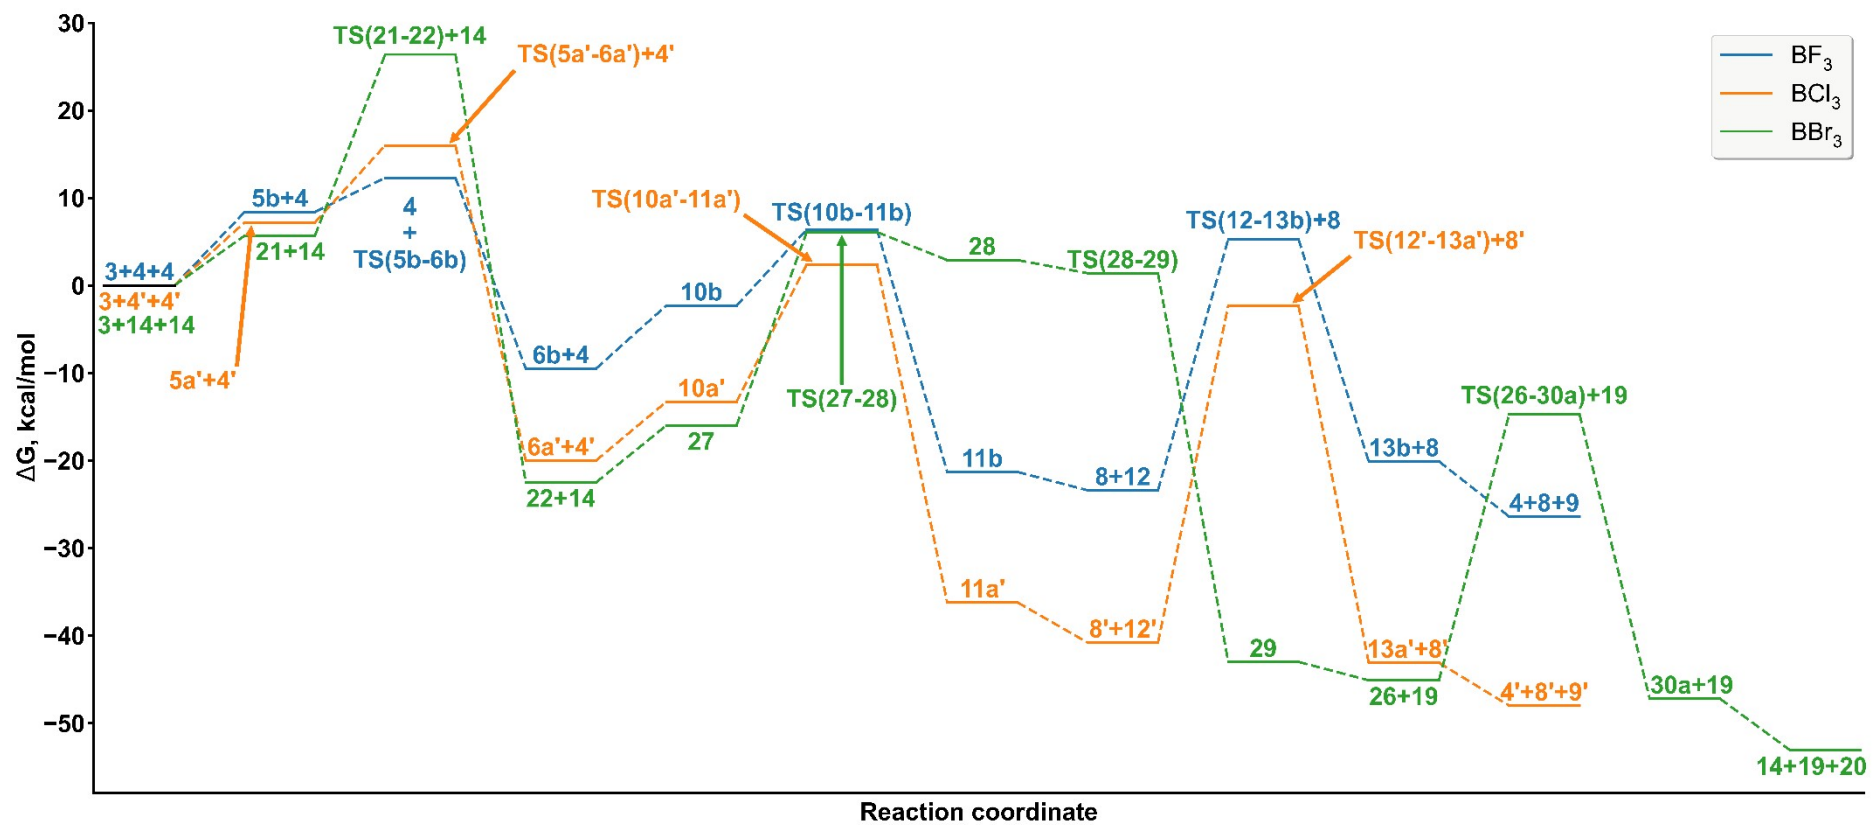

Figure S1. Energy diagram of route 2 of the reaction between 1,3-diethylalumolane and BHal<sub>3</sub>.
